# Supplementary material for: Asymmetric construction of trifluoromethylated pyrrolidines via Cu(i)-catalyzed 1,3-dipolar cycloaddition of azomethine ylides with 4,4,4-trifluorocrotonates
Source: Royal Society of Chemistry journal article supplement (doi:10.1039/c1cc14295j), 2011-01-01
Supplement: c1cc14295j.pdf [file c1cc14295j.pdf]

**Asymmetric construction of trifluoromethylated pyrrolidines via  
Cu(I)-catalyzed 1,3-dipolar cycloaddition of azomethine ylides with  
4,4,4-trifluorocrotonates**

Qing-Hua Li, Min-Chao Tong, Jun Li, Hai-Yan Tao, and Chun-Jiang Wang\*

*College of Chemistry and Molecular Sciences, Wuhan University, 430072, China*

E-mail: cjwang@whu.edu.cn

**Supporting Information**

Table of Contents

|       |                                                                                                                                                                                          |         |
|-------|------------------------------------------------------------------------------------------------------------------------------------------------------------------------------------------|---------|
| I.    | General Remarks.....                                                                                                                                                                     | S2      |
| II.   | General Procedure for racemic 1,3-Dipolar Cycloaddition of Azomethine Ylides with <i>trans</i> or <i>cis</i> -4,4,4-Trifluorocrotonates.....                                             | S2      |
| III.  | General Procedure for Asymmetric 1,3-Dipolar Cycloaddition of Azomethine Ylides with <i>trans</i> or <i>cis</i> -4,4,4-Trifluorocrotonates.....                                          | S3-15   |
| IV.   | X-ray crystal structures of (2 <i>R</i> ,3 <i>S</i> ,4 <i>R</i> ,5 <i>S</i> )- <b>6cg</b> and (2 <i>R</i> ,3 <i>S</i> ,4 <i>S</i> ,5 <i>S</i> )- <b>7cg</b> .....                        | S16     |
| V.    | Proposed Transition States of the <i>endo</i> -Selectivity for Asymmetric 1,3-Dipolar Cycloaddition of Azomethine Ylides with <i>trans</i> or <i>cis</i> -4,4,4-Trifluorocrotonates..... | S17     |
| VI.   | References.....                                                                                                                                                                          | S18     |
| VII.  | <sup>1</sup> H NMR and <sup>13</sup> C NMR Spectra.....                                                                                                                                  | S19-60  |
| VIII. | HPLC Chromatograms.....                                                                                                                                                                  | S61-102 |

## General Remarks.

$^1\text{H}$  NMR spectra were recorded on a VARIAN Mercury 300 MHz spectrometer in  $\text{CDCl}_3$ . Chemical shifts are reported in ppm with the internal TMS signal at 0.0 ppm as a standard. The data are reported as (s = single, d = double, t = triple, q = quartet, m = multiple or unresolved, brs = broad single, coupling constant(s) in Hz, integration).  $^{13}\text{C}$  NMR spectra were recorded on a VARIAN Mercury 75 or VARIAN Mercury 150 MHz spectrometer in  $\text{CDCl}_3$ . Chemical shifts are reported in ppm with the internal chloroform signal at 77.0 ppm as a standard. Commercially obtained reagents were used without further purification. All reactions were monitored by TLC with silica gel-coated plates. Diastereomeric ratios were determined from crude  $^1\text{H}$  NMR or HPLC analysis. Enantiomeric ratios were determined by HPLC, using a chiralcel AD-H column, a chiralpak AS-H column with hexane and *i*-PrOH as solvents. Ligands **L3-L7** were prepared according to the literature procedure reported by us.<sup>1</sup> *trans* and *cis*-4,4,4-Trifluorocrotonates were prepared according to the literature procedure.<sup>2</sup> The racemic adducts were obtained by using  $\text{AgOAc}/\text{PPh}_3$  as the catalyst. The absolute configuration of (2*R*,3*S*,4*R*,5*S*)-**6cg** and (2*R*,3*S*,4*S*,5*S*)-**7cg** achieved by  $\text{Cu}(\text{CH}_3\text{CN})_4\text{BF}_4/(\text{S})\text{-TF-BiphamPhos}$  **L7** was determined unequivocally according to the X-ray diffraction analysis, and those of other adducts were deduced on the basis of these results.

## General Procedure for racemic 1,3-Dipolar Cycloaddition of Azomethine Ylides with *trans* or *cis*-4,4,4-Trifluorocrotonates Catalyzed by $\text{AgOAc}/\text{PPh}_3$ Complex

Under argon atmosphere,  $\text{PPh}_3$  (6.6 mg, 0.0253 mmol) and  $\text{AgOAc}$  (3.8 mg, 0.023 mmol) were dissolved in 2 mL DCM, and stirred at room temperature for about 1h. Then, imine substrate (0.35 mmol),  $\text{Et}_3\text{N}$  (0.03 mmol) and *trans* or *cis*-4,4,4-Trifluorocrotonates (0.23 mmol) were added sequentially. Once starting material was consumed (monitored by TLC), the organic solvent was removed and the residue was purified by column chromatography to give the cycloaddition product, which was used as the racemic sample for the chiral HPLC analysis.

### General Procedure for Asymmetric 1,3-Dipolar Cycloaddition of Azomethine Ylides with *trans* or *cis*-4,4,4-Trifluorocrotonates Catalyzed by $\text{Cu}(\text{CH}_3\text{CN})_4\text{BF}_4$ /(*S*)-TF-BiphamPhos Complex

Under argon atmosphere (*S*)-TF-BiphamPhos **L7** (6.1 mg, 0.0076 mmol) and  $\text{Cu}(\text{CH}_3\text{CN})_4\text{BF}_4$  (2.1 mg, 0.0069 mmol) were dissolved in 2 mL DCM, and stirred at room temperature for about 1h. Then, imine substrate (0.35 mmol),  $\text{Et}_3\text{N}$  (0.03 mmol) and *trans* or *cis*-4,4,4-Trifluorocrotonates (0.23 mmol) were added sequentially. Once starting material was consumed (monitored by TLC), the mixture was filtered through celite and the filtrate was concentrated to dryness. The product purified by column chromatography to give the corresponding cycloaddition product, which was then directly analyzed by chiral HPLC to determine the enantiomeric excess.

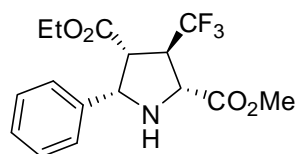

**(3aa)**

#### **(2*R*,3*R*,4*R*,5*S*)-4-ethyl 2-methyl 5-phenyl-3-(trifluoromethyl)pyrrolidine-2,4-dicarboxylate**

The title compound was prepared according to the general procedure as described above in 85% yield. m.p. 57 °C;  $[\alpha]_D^{25} = -30.7$  (*c* 0.88,  $\text{CHCl}_3$ );  $^1\text{H}$  NMR ( $\text{CDCl}_3$ , TMS, 300 MHz)  $\delta$  7.24 (m, 5H), 4.55 (d, *J* = 7.8 Hz, 1H), 3.99 (d, *J* = 6.3 Hz, 1H), 3.78 (s, 3H), 3.70-3.60 (m, 1H), 3.56-3.48 (m, 2H); 3.33-3.30 (m, 1H); 2.87 (brs, 1H), 0.68 (t, *J* = 7.2 Hz, 3H);  $^{13}\text{C}$  NMR ( $\text{CDCl}_3$ , TMS, 75 MHz)  $\delta$  171.17, 170.87, 136.73, 128.49, 128.30, 126.69, 126.32 (q,  $J_{\text{CF}} = 270.4\text{Hz}$ ), 65.82, 61.00, 60.40, 52.79, 50.89, 50.11 (q,  $J_{\text{CF}} = 27.2\text{Hz}$ ), 13.36; IR (KBr)  $\nu$  3683, 3622, 3021, 2975, 2400, 1731, 1516, 1426, 1215, 1045, 929, 756  $\text{cm}^{-1}$ . The product was analyzed by HPLC to determine the enantiomeric excess: 86% ee (Chiralcel AS-H, *i*-propanol/hexane = 2/98, flow rate 1.0 mL/min,  $\lambda$  = 220 nm);  $t_r$  = 5.64 and 6.68 min.

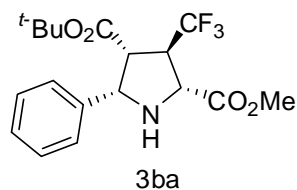

**(3ba)**

**(2R,3R,4R,5S)-4-tert-butyl 2-methyl 5-phenyl-3-(trifluoromethyl)pyrrolidine-2,4-dicarboxylate**

The title compound was prepared according to the general procedure as described above in 82% yield. m.p. 85 °C;  $[\alpha]_D^{25} = -29.0$  (*c* 1.0, CHCl<sub>3</sub>); <sup>1</sup>H NMR (CDCl<sub>3</sub>, TMS, 300 MHz) δ 7.27-7.20 (m, 5H), 4.51 (d, *J* = 7.5 Hz, 1H), 3.95 (d, *J* = 6.6 Hz, 1H), 3.78 (s, 3H), 3.48-3.41 (m, 1H), 3.29-3.26 (m, 1H); 2.77 (brs, 1H), 0.93 (s, 9H); <sup>13</sup>C NMR (CDCl<sub>3</sub>, TMS, 150 MHz) δ 171.18, 169.91, 136.82, 128.18, 127.70, 126.97, 126.40 (q, *J*<sub>CF</sub> = 277.2 Hz), 81.63, 65.51, 60.45, 52.73, 51.31, 50.91 (q, *J*<sub>CF</sub> = 28.4 Hz), 27.26; IR (KBr) ν 3684, 3622, 3019, 2977, 2439, 1746, 1715, 1520, 1477, 1370, 1216, 1046, 929, 849, 754, 744, 669 cm<sup>-1</sup>. HRMS: calcd. for C<sub>18</sub>H<sub>22</sub>F<sub>3</sub>NO<sub>4</sub>: 373.1501, found. 373.1502. The product was analyzed by HPLC to determine the enantiomeric excess: 93% ee (Chiralcel AS-H, *i*-propanol/hexane = 2/98, flow rate 1.0 mL/min, λ = 220 nm); t<sub>r</sub> = 5.84 and 7.81 min.

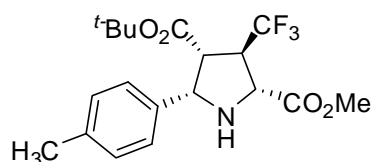

**(3bb)**

**(2R,3R,4R,5S)-4-tert-butyl 2-methyl 5-p-tolyl-3-(trifluoromethyl)pyrrolidine-2,4-dicarboxylate**

The title compound was prepared according to the general procedure as described above in 72% yield. m.p. 82 °C;  $[\alpha]_D^{25} = -52.1$  (*c* 0.36, CHCl<sub>3</sub>); <sup>1</sup>H NMR (CDCl<sub>3</sub>, TMS, 300 MHz) δ 7.24-7.13 (m, 4H), 4.60 (d, *J* = 6.9 Hz, 1H), 4.08 (d, *J* = 6.9 Hz, 1H), 3.87 (s, 3H), 3.52-3.47 (m, 1H), 3.36-3.34 (m, 1H), 2.33 (s, 3H), 1.04 (s, 9H); <sup>13</sup>C NMR (CDCl<sub>3</sub>, TMS, 75 MHz) δ 171.21, 170.00, 137.44, 133.71, 128.84, 126.87, 126.42 (q, *J*<sub>CF</sub> = 277.2 Hz), 81.66, 65.42, 60.54, 52.78, 51.46, 51.03 (q, *J*<sub>CF</sub> = 27.2 Hz),



27.35, 20.98; IR (KBr)  $\nu$  3684, 3621, 3019, 2898, 2400, 1744, 1521, 1423, 1216, 1045, 929, 776  $\text{cm}^{-1}$ . HRMS: calcd. for  $\text{C}_{19}\text{H}_{24}\text{F}_3\text{NO}_4$ : 387.1657, found. 387.1655 The product was analyzed by HPLC to determine the enantiomeric excess: 93% ee (Chiralcel AS-H, *i*-propanol/hexane = 2/98, flow rate 1.0 mL/min,  $\lambda$  = 220 nm);  $t_r$  = 4.17 and 4.78 min.

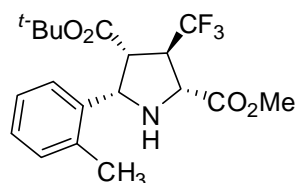

**(3bc)**

**(2R,3R,4R,5S)-4-tert-butyl 2-methyl 5-o-tolyl-3-(trifluoromethyl)pyrrolidine-2,4-dicarboxylate**

The title compound was prepared according to the general procedure as described above in 87% yield. m.p. 73 °C;  $[\alpha]_D^{25} = -68.9$  (*c* 0.65,  $\text{CHCl}_3$ );  $^1\text{H}$  NMR ( $\text{CDCl}_3$ , TMS, 300 MHz)  $\delta$  7.40-7.37 (m, 1H), 7.22-7.18 (m, 3H), 4.69 (d,  $J$  = 7.5 Hz, 1H), 4.06 (d,  $J$  = 6.9 Hz, 1H), 3.88 (s, 3H), 3.67-3.60 (m, 1H), 3.45-3.41 (m, 1H), 2.38 (s, 3H), 0.96 (s, 9H);  $^{13}\text{C}$  NMR ( $\text{CDCl}_3$ , TMS, 75 MHz)  $\delta$  171.24, 170.04, 137.79, 136.66, 128.45, 128.16, 127.58, 126.46 (q,  $J_{\text{CF}}$  = 276.7 Hz), 124.10, 81.60, 65.63, 60.56, 52.78, 51.41, 51.00 (q,  $J_{\text{CF}}$  = 27.2 Hz), 27.34, 21.30; IR (KBr)  $\nu$  3684, 3620, 3019, 2977, 2400, 1746, 1521, 1423, 1221, 1046, 929, 782, 751, 669  $\text{cm}^{-1}$ . HRMS: calcd. for  $\text{C}_{19}\text{H}_{24}\text{F}_3\text{NO}_4$ : 387.1657, found. 387.1659. The product was analyzed by HPLC to determine the enantiomeric excess: 93% ee (Chiralcel AS-H, *i*-propanol/hexane = 2/98, flow rate 1.0 mL/min,  $\lambda$  = 220 nm);  $t_r$  = 5.40 and 7.44 min.

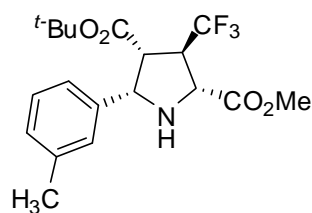

**(3bd)**

**(2R,3R,4R,5S)-4-tert-butyl 2-methyl 5-m-tolyl-3-(trifluoromethyl)pyrrolidine-2,4-dicarboxylate**

The title compound was prepared according to the general procedure as described above in 88% yield. m.p. 82 °C;  $[\alpha]_D^{25} = -31.2$  (*c* 0.80, CHCl<sub>3</sub>); <sup>1</sup>H NMR (CDCl<sub>3</sub>, TMS, 300 MHz) δ 7.26-7.08 (m, 4H), 4.59 (d, *J* = 7.2 Hz, 1H), 4.07 (d, *J* = 6.3 Hz, 1H), 3.87 (s, 3H), 3.54-3.47 (m, 1H), 3.37-3.33 (m, 1H), 2.34 (s, 3H), 1.03 (s, 9H); <sup>13</sup>C NMR (CDCl<sub>3</sub>, TMS, 75 MHz) 171.21, 170.02, 137.78, 136.61, 128.45, 128.16, 127.55, 126.37 (q, *J*<sub>CF</sub> = 267.8 Hz), 124.07, 81.60, 65.61, 60.52, 52.78, 51.38, 50.97 (q, *J*<sub>CF</sub> = 26.1 Hz), 27.32, 21.30; IR (KBr) ν 3685, 3624, 3017, 2977, 2400, 1735, 1519, 1420, 1215, 1046, 929, 753 cm<sup>-1</sup>. HRMS: calcd. for C<sub>19</sub>H<sub>24</sub>F<sub>3</sub>NO<sub>4</sub>: 387.1657, found. 387.1656. The product was analyzed by HPLC to determine the enantiomeric excess: 90% ee (Chiralcel AS-H, *i*-propanol/hexane = 2/98, flow rate 1.0 mL/min, λ = 220 nm); *t*<sub>r</sub> = 5.36 and 6.83 min.

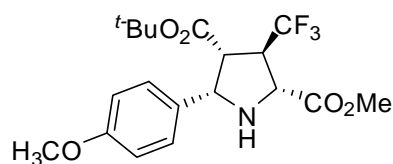

**(3be)**

**(2R,3R,4R,5S)-4-tert-butyl 2-methyl 5-(4-methoxyphenyl)-3-(trifluoromethyl)pyrrolidine-2,4-dicarboxylate**

The title compound was prepared according to the general procedure as described above in 88% yield. m.p. 74 °C;  $[\alpha]_D^{25} = -32.3$  (*c* 0.85, CHCl<sub>3</sub>); <sup>1</sup>H NMR (CDCl<sub>3</sub>, TMS, 300 MHz) δ 7.29-7.26 (d, *J* = 7.8 Hz, 2H), 6.89-6.86 (d, *J* = 8.1 Hz, 2H), 4.57 (d, *J* = 7.2 Hz, 1H), 4.05 (d, *J* = 6.3 Hz, 1H), 3.87 (s, 3H), 3.80 (s, 3H), 3.52 (m, 1H), 3.35-3.32 (m, 1H), 1.06 (s, 9H); <sup>13</sup>C NMR (CDCl<sub>3</sub>, TMS, 75 MHz) δ 171.21, 170.01, 159.26, 128.91, 128.14, 126.73 (q, *J*<sub>CF</sub> = 268.8 Hz), 113.64, 81.67, 65.08, 60.43, 55.30, 52.79, 51.41, 50.91 (q, *J*<sub>CF</sub> = 27.2 Hz), 27.41; IR (KBr) ν 3684, 3622, 3019, 2977, 2435, 2400, 1745, 1518, 1424, 1216, 1046, 929, 754, 731, 669 cm<sup>-1</sup>. HRMS: calcd. for C<sub>19</sub>H<sub>24</sub>F<sub>3</sub>NO<sub>5</sub>: 403.1607, found. 403.1610 The product was analyzed by HPLC to determine the enantiomeric excess: 99% ee (Chiralcel AS-H,

*i*-propanol/hexane = 2/98, flow rate 1.0 mL/min,  $\lambda$  = 220 nm);  $t_r$  = 5.58 and 6.50 min.

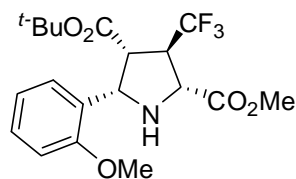

**(3bf)**

**(2*R*,3*R*,4*R*,5*S*)-4-*tert*-butyl 2-methyl 5-(2-methoxyphenyl)-3-(trifluoromethyl)pyrrolidine-2,4-dicarboxylate**

The title compound was prepared according to the general procedure as described above in 74% yield. m.p. 80 °C;  $[\alpha]_D^{25} = -79.0$  (*c* 0.88, CHCl<sub>3</sub>); <sup>1</sup>H NMR (CDCl<sub>3</sub>, TMS, 300 MHz)  $\delta$  7.31-7.26 (m, 2H), 6.96-6.86 (m, 2H), 4.67 (d, *J* = 7.2 Hz, 1H), 4.02 (d, *J* = 6.9 Hz, 1H), 3.87 (s, 3H), 3.87 (s, 3H), 3.61-3.58 (m, 1H), 3.50 (m, 1H), 0.97 (s, 9H); <sup>13</sup>C NMR (CDCl<sub>3</sub>, TMS, 75 MHz) 171.31, 170.51, 156.96, 128.77, 126.59 (q, *J*<sub>CF</sub> = 277.1 Hz), 126.30, 125.17, 120.32, 109.76, 81.10, 61.44, 60.28, 55.16, 52.72, 51.03 (q, *J*<sub>CF</sub> = 27.2 Hz), 49.48, 27.30; IR (KBr)  $\nu$  3683, 3621, 3019, 2977, 2400, 1731, 1521, 1423, 1216, 1046, 929, 770, 629 cm<sup>-1</sup>. HRMS: calcd. for C<sub>19</sub>H<sub>24</sub>F<sub>3</sub>NO<sub>5</sub>: 403.1607, found. 403.1609 The product was analyzed by HPLC to determine the enantiomeric excess: 95% ee (Chiralcel AS-H, *i*-propanol/hexane = 2/98, flow rate 1.0 mL/min,  $\lambda$  = 220 nm);  $t_r$  = 6.27 and 8.60 min.

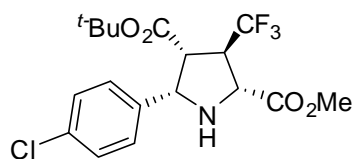

**(3bg)**

**(2*R*,3*R*,4*R*,5*S*)-4-*tert*-butyl 2-methyl 5-(4-chlorophenyl)-3-(trifluoromethyl)pyrrolidine-2,4-dicarboxylate**

The title compound was prepared according to the general procedure as described above in 76% yield. m.p. 71 °C;  $[\alpha]_D^{25} = -32.9$  (*c* 0.76, CHCl<sub>3</sub>); <sup>1</sup>H NMR (CDCl<sub>3</sub>, TMS, 300 MHz)  $\delta$  7.32 (m, 4H), 4.60 (d, *J* = 6.0 Hz, 1H), 4.08 (d, *J* = 6.0 Hz, 1H), 3.87 (s, 3H), 3.54 (m, 1H), 3.34 (m, 1H); 1.06 (s, 9H); <sup>13</sup>C NMR (CDCl<sub>3</sub>, TMS, 150

MHz)  $\delta$  171.06, 169.64, 135.59, 133.59, 128.47, 128.31, 126.33 (q,  $J_{\text{CF}} = 277.2$  Hz), 81.95, 64.78, 60.30, 52.81, 51.10, 50.46 (q,  $J_{\text{CF}} = 26.9$  Hz), 27.37; IR (KBr)  $\nu$  3683, 3583, 3020, 2400, 2361, 1744, 1522, 1421, 1216, 1016, 929, 770, 669  $\text{cm}^{-1}$ . HRMS: calcd. for  $\text{C}_{18}\text{H}_{21}\text{ClF}_3\text{NO}_4$ : 407.1111, found. 407.1108 The product was analyzed by HPLC to determine the enantiomeric excess: 93% ee (Chiralcel AS-H, *i*-propanol/hexane = 2/98, flow rate 1.0 mL/min,  $\lambda = 220$  nm);  $t_r = 4.91$  and 5.72 min.

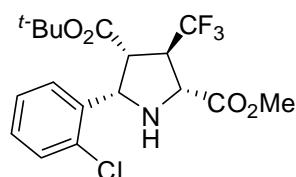

**(3bh)**

**(2R,3R,4R,5S)-4-tert-butyl 2-methyl 5-(2-chlorophenyl)-3-(trifluoromethyl)pyrrolidine-2,4-dicarboxylate**

The title compound was prepared according to the general procedure as described above in 85% yield. m.p. 104 °C;  $[\alpha]_{\text{D}}^{25} = -74.7$  (*c* 0.61,  $\text{CHCl}_3$ );  $^1\text{H}$  NMR ( $\text{CDCl}_3$ , TMS, 300 MHz)  $\delta$  7.51-7.24 (m, 4H), 4.79 (d,  $J = 7.2$  Hz, 1H), 4.00 (d,  $J = 6.3$  Hz, 1H), 3.85 (s, 3H), 3.66-3.64 (m, 2H), 0.98 (s, 9H);  $^{13}\text{C}$  NMR ( $\text{CDCl}_3$ , TMS, 150 MHz)  $\delta$  171.03, 169.72, 134.94, 133.90, 129.21, 128.97, 127.62, 126.79, 126.47 (q,  $J_{\text{CF}} = 277.1$  Hz), 81.58, 62.53, 59.62, 52.82, 49.89 (q,  $J_{\text{CF}} = 25.8$  Hz), 48.37, 27.28; IR (KBr)  $\nu$  3684, 3622, 3019, 2977, 2400, 1747, 1520, 1423, 1216, 1046, 929, 757, 669  $\text{cm}^{-1}$ . HRMS: calcd. for  $\text{C}_{18}\text{H}_{21}\text{ClF}_3\text{NO}_4$ : 407.1111, found. 407.1110 The product was analyzed by HPLC to determine the enantiomeric excess: 94% ee (Chiralcel AS-H, *i*-propanol/hexane = 2/98, flow rate 1.0 mL/min,  $\lambda = 220$  nm);  $t_r = 6.13$  and 9.23 min.

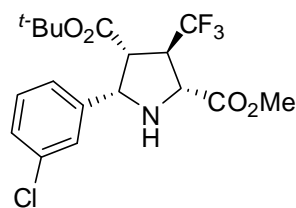

**(3bi)**

**(2R,3R,4R,5S)-4-tert-butyl 2-methyl 5-(3-chlorophenyl)-3-(trifluoromethyl)pyrrolidine-2,4-dicarboxylate**

### pyrrolidine-2,4-dicarboxylate

The title compound was prepared according to the general procedure as described above in 80% yield. m.p. 115 °C;  $[\alpha]_D^{25} = -68.0$  (*c* 0.25, CHCl<sub>3</sub>); <sup>1</sup>H NMR (CDCl<sub>3</sub>, TMS, 300 MHz) δ 7.37-7.26 (m, 4H), 4.73 (d, *J* = 6.0 Hz, 1H), 4.25 (d, *J* = 6.3 Hz, 1H), 3.91 (s, 3H), 3.55-3.43 (m, 2H), 1.11 (s, 9H); <sup>13</sup>C NMR (CDCl<sub>3</sub>, TMS, 75 MHz) δ 170.98, 169.58, 139.15, 134.26, 129.58, 127.97, 127.40, 125.26, 124.53, 82.05, 64.88, 60.31, 52.87, 51.05, 27.39; IR (KBr) ν 3615, 3584, 3019, 2965, 2400, 1747, 1520, 1422, 1216, 1046, 929, 772, 757, 669 cm<sup>-1</sup>. HRMS: calcd. for C<sub>18</sub>H<sub>21</sub>ClF<sub>3</sub>NO<sub>4</sub>: 407.1111, found. 407.1114 The product was analyzed by HPLC to determine the enantiomeric excess: 91% ee (Chiralcel AS-H, *i*-propanol/hexane = 2/98, flow rate 1.0 mL/min, λ = 220 nm); t<sub>r</sub> = 6.88 and 9.57 min.

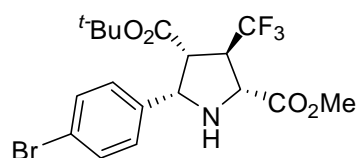

**(3b<sub>j</sub>)**

### (2*R*,3*R*,4*R*,5*S*)-4-*tert*-butyl 2-methyl 5-(4-bromophenyl)-3-(trifluoromethyl)

### pyrrolidine-2,4-dicarboxylate

The title compound was prepared according to the general procedure as described above in 83% yield. m.p. 108 °C;  $[\alpha]_D^{25} = -32.9$  (*c* 0.52, CHCl<sub>3</sub>); <sup>1</sup>H NMR (CDCl<sub>3</sub>, TMS, 300 MHz) δ 7.50-7.47 (m, 2H), 7.28-7.25 (m, 2H), 4.57 (d, *J* = 7.5 Hz, 1H), 4.06 (d, *J* = 5.7 Hz, 1H), 3.87 (s, 3H), 3.54 (m, 1H), 3.36-3.34 (m, 1H); 1.07 (s, 9H); <sup>13</sup>C NMR (CDCl<sub>3</sub>, TMS, 150 MHz) δ 171.01, 169.59, 136.05, 131.27, 128.82, 126.30 (q, *J*<sub>CF</sub> = 276.0 Hz), 121.65, 81.99, 64.79, 60.27, 52.85, 51.04, 50.60 (q, *J*<sub>CF</sub> = 27.0 Hz), 27.37; IR (KBr) ν 36845, 3622, 3019, 2977, 2400, 1745, 1521, 1423, 1216, 1046, 929, 773, 669 cm<sup>-1</sup>. HRMS: calcd. for C<sub>18</sub>H<sub>21</sub>BrF<sub>3</sub>NO<sub>4</sub>: 451.0606, found. 451.0611 The product was analyzed by HPLC to determine the enantiomeric excess: 92% ee (Chiralcel AS-H, *i*-propanol/hexane = 2/98, flow rate 1.0 mL/min, λ = 220 nm); t<sub>r</sub> = 5.07 and 6.02 min.

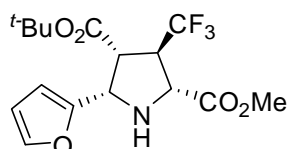

**(3bk)**

**((2*R*,3*R*,4*R*,5*S*))-4-*tert*-butyl 2-methyl 5-(furan-2-yl)-3-(trifluoromethyl)pyrrolidine-2,4-di-carboxylate**

The title compound was prepared according to the general procedure as described above in 90% yield. m.p. 76 °C;  $[\alpha]_D^{25} = +7.4$  (*c* 0.61, CHCl<sub>3</sub>); <sup>1</sup>H NMR (CDCl<sub>3</sub>, TMS, 300 MHz) δ 7.33 (m, 1H), 6.32-6.26 (m, 2H), 4.64 (d, *J* = 7.2 Hz, 1H), 4.02 (d, *J* = 5.7 Hz, 1H), 3.80-3.75 (m, 4H), 3.41-3.37 (m, 1H), 1.24 (s, 9H); <sup>13</sup>C NMR (CDCl<sub>3</sub>, TMS, 150 MHz) 171.73, 168.84, 151.51, 141.96, 126.51 (q, *J*<sub>CF</sub> = 277.2 Hz), 110.35, 107.54, 81.88, 60.19, 59.26, 52.84, 50.34, 49.14 (q, *J*<sub>CF</sub> = 26.9 Hz), 27.53; IR (KBr) ν 3684, 3621, 3019, 2977, 2400, 1742, 1522, 1423, 1217, 1046, 929, 770, 669 cm<sup>-1</sup>. HRMS: calcd. for C<sub>16</sub>H<sub>20</sub>F<sub>3</sub>NO<sub>5</sub>: 363.1294, found. 363.1292. The product was analyzed by HPLC to determine the enantiomeric excess: 88% ee (Chiralcel AS-H, *i*-propanol/hexane = 2/98, flow rate 1.0 mL/min, λ = 220 nm); *t*<sub>r</sub> = 7.41 and 10.39 min.

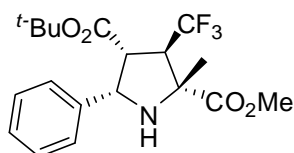

**(3bl)**

**(2*R*,3*R*,4*R*,5*S*))-4-*tert*-butyl 2-methyl 2-methyl-5-phenyl-3-(trifluoromethyl)pyrrolidine-2,4-dicarboxylate**

The title compound was prepared according to the general procedure as described above in 65% yield. m.p. 88 °C;  $[\alpha]_D^{25} = -22.2$  (*c* 0.35, CHCl<sub>3</sub>); <sup>1</sup>H NMR (CDCl<sub>3</sub>, TMS, 300 MHz) δ 7.35-7.30 (m, 5H), 4.82 (d, *J* = 9.0 Hz, 1H), 3.92-3.86 (m, 4H), 3.51-3.46 (m, 1H), 1.60 (s, 3H), 0.99 (s, 9H); <sup>13</sup>C NMR (CDCl<sub>3</sub>, TMS, 150 MHz) 173.57, 169.64, 137.90, 128.17, 127.93, 127.75, 126.08 (q, *J*<sub>CF</sub> = 277.1 Hz), 81.40, 65.91, 62.66, 52.98, 52.73 (q, *J*<sub>CF</sub> = 28.1 Hz), 51.08, 27.25, 19.79; IR (KBr) ν 3684,

3621, 3019, 2977, 2400, 1731, 1522, 1423, 1216, 1046, 929, 770, 669  $\text{cm}^{-1}$ . HRMS: calcd. for  $\text{C}_{19}\text{H}_{24}\text{F}_3\text{NO}_4$ : 387.1657, found. 387.1654 The product was analyzed by HPLC to determine the enantiomeric excess: 94% ee (Chiralcel AS-H, *i*-propanol/hexane = 2/98, flow rate 1.0 mL/min,  $\lambda$  = 220 nm);  $t_r$  = 5.66 and 7.00 min.

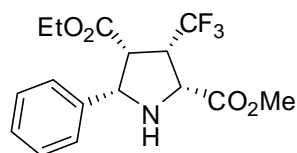

**(4ca)**

**(2*R*,3*S*,4*R*,5*S*)- 4-ethyl 2-methyl 5-phenyl-3-(trifluoromethyl)pyrrolidine  
-2,4-dicarboxylate**

The title compound was prepared according to the general procedure as described above in 87% yield. m.p. 118 °C;  $[\alpha]_D^{25}$  = -44.3 (*c* 1.05,  $\text{CHCl}_3$ );  $^1\text{H}$  NMR ( $\text{CDCl}_3$ , TMS, 300 MHz)  $\delta$  7.36-7.29 (m, 5H), 4.49 (d,  $J$  = 3.9 Hz, 1H), 4.32 (d,  $J$  = 9.6 Hz, 1H), 3.84- 3.80 (m, 5H), 3.74-3.69 (m, 1H), 3.56-3.52 (m, 1H), 3.25 (brs, 1H), 0.91 (t,  $J$  = 7.5 Hz, 3H);  $^{13}\text{C}$  NMR ( $\text{CDCl}_3$ , TMS, 150 MHz) 169.97, 168.82, 136.11, 128.36, 127.64, 126.18, 125.04 (q,  $J_{\text{CF}}$  = 277.2 Hz), 64.70, 60.68, 58.56, 52.55, 50.20, 13.51; IR (KBr)  $\nu$  3684, 3622, 3019, 2977, 2400, 1750, 1522, 1437, 1216, 1046, 929, 770, 669  $\text{cm}^{-1}$ . HRMS: calcd. for  $\text{C}_{16}\text{H}_{18}\text{F}_3\text{NO}_4$ : 345.1188, found. 345.1192. The product was analyzed by HPLC to determine the enantiomeric excess: 99% ee 96:4 dr (Chiralcel AS-H, *i*-propanol/hexane = 5/95, flow rate 1.0 mL/min,  $\lambda$  = 220 nm);  $t_r$  = 11.02 and 35.62 min.

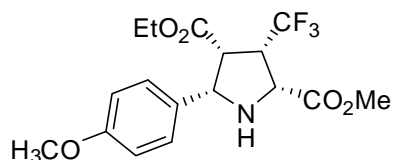

**(4ce)**

**(2*R*,3*S*,4*R*,5*S*)-4-ethyl 2-methyl 5-(4-methoxyphenyl)-3-(trifluoromethyl)  
pyrrolidine-2,4-dicarboxylate**

The title compound was prepared according to the general procedure as described

above in 82% yield. m.p. 120 °C;  $[\alpha]_D^{25} = -34.7$  (*c* 0.56, CHCl<sub>3</sub>); <sup>1</sup>H NMR (CDCl<sub>3</sub>, TMS, 300 MHz) δ 7.29-7.26 (m, 2H), 6.89-6.86 (m, 2H), 4.42 (d, *J* = 4.2 Hz, 1H), 4.30 (d, *J* = 10.2 Hz, 1H), 3.88- 3.80 (m, 8H), 3.70-3.61 (m, 1H), 3.50-3.48 (m, 1H), 0.96 (t, *J* = 7.2 Hz, 3H); <sup>13</sup>C NMR (CDCl<sub>3</sub>, TMS, 150 MHz) 169.97, 168.89, 158.87, 128.11, 127.25, 125.03 (q, *J*<sub>CF</sub> = 277.1 Hz) 113.59, 64.17, 60.50, 58.46, 55.04, 52.52 (q, *J*<sub>CF</sub> = 28.1 Hz), 52.35, 50.18, 13.48; IR (KBr) ν 3684, 3621, 3019, 2976, 2400, 1744, 1518, 1424, 1216, 1045, 929, 758, 669 cm<sup>-1</sup>. HRMS: calcd. for C<sub>17</sub>H<sub>20</sub>F<sub>3</sub>NO<sub>5</sub>: 375.1294, found. 375.1296. The product was analyzed by HPLC to determine the enantiomeric excess: 98% ee >98:2 dr (Chiralcel AS-H, *i*-propanol/hexane = 10/90, flow rate 1.0 mL/min, λ = 220 nm); t<sub>r</sub> = 12.54 and 26.19 min.

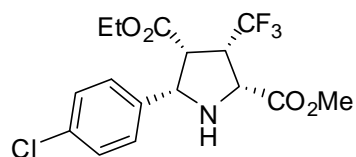

**(4c9)**

**(2R,3S,4R,5S)-4-ethyl 2-methyl 5-(4-chlorophenyl)-3-(trifluoromethyl)pyrrolidine-2,4-dicarboxylate**

The title compound was prepared according to the general procedure as described above in 78% yield. m.p. 118 °C;  $[\alpha]_D^{25} = -36.0$  (*c* 0.22, CHCl<sub>3</sub>); <sup>1</sup>H NMR (CDCl<sub>3</sub>, TMS, 300 MHz) δ 7.30-7.18 (m, 4H), 4.33 (d, *J* = 4.2 Hz, 1H), 4.19 (d, *J* = 9.9 Hz, 1H), 3.86-3.71 (m, 5H), 3.63-3.51 (m, 1H), 3.47-3.41 (m, 1H), 2.96 (brs, 1H), 0.88 (d, *J* = 7.2 Hz, 3H); <sup>13</sup>C NMR (CDCl<sub>3</sub>, TMS, 150 MHz) 169.84, 168.71, 134.78, 133.57, 128.59, 127.69, 124.95 (q, *J*<sub>CF</sub> = 277.1 Hz), 64.17, 60.93, 58.56, 52.72 (q, *J*<sub>CF</sub> = 27.0 Hz), 49.95, 13.63; IR (KBr) ν 3681, 3583, 3019, 2400, 1710, 1523, 1421, 1216, 1018, 929, 773, 669 cm<sup>-1</sup>. HRMS: calcd. for C<sub>16</sub>H<sub>17</sub>ClF<sub>3</sub>NO<sub>4</sub>: 379.0798, found. 379.0794. The product was analyzed by HPLC to determine the enantiomeric excess: 99% ee 96:4 dr (Chiralcel AS-H, *i*-propanol/hexane = 10/90, flow rate 1.0 mL/min, λ = 220 nm); t<sub>r</sub> = 9.30 and 17.09 min.



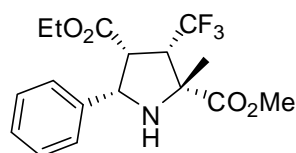

**(4cl)**

**(2R,3S,4R,5S)-4-ethyl 2-methyl 2-methyl-5-phenyl-3-(trifluoromethyl)pyrrolidine-2,4-dicarboxylate**

The title compound was prepared according to the general procedure as described above in 83% yield.  $[\alpha]_D^{25} = -59.0$  (*c* 0.10, CHCl<sub>3</sub>); <sup>1</sup>H NMR (CDCl<sub>3</sub>, TMS, 300 MHz)  $\delta$  7.35-7.27 (m, 5H), 4.55 (d, *J* = 4.8 Hz, 1H), 3.84-3.78 (m, 5H), 3.54-3.50 (m, 1H), 3.23-3.17 (m, 1H), 1.69 (s, 3H), 0.88 (t, *J* = 6.9 Hz, 3H); <sup>13</sup>C NMR (CDCl<sub>3</sub>, TMS, 75 MHz) 172.46, 168.80, 136.27, 128.31, 127.58, 126.25, 125.18 (q, *J*<sub>CF</sub> = 278.3 Hz), 65.37, 62.85, 60.69 (q, *J*<sub>CF</sub> = 26.2 Hz), 52.75, 52.23, 29.61, 29.33, 13.52; IR (KBr)  $\nu$  3684, 3622, 3019, 2977, 2400, 1746, 1522, 1424, 1216, 1046, 929, 773, 669 cm<sup>-1</sup>. HRMS: calcd. for C<sub>17</sub>H<sub>20</sub>F<sub>3</sub>NO<sub>4</sub>: 359.1344, found. 359.1342. The product was analyzed by HPLC to determine the enantiomeric excess: 89% ee >98:2 dr (Chiralcel AS-H, *i*-propanol/hexane = 2/98, flow rate 1.0 mL/min,  $\lambda$  = 220 nm); *t*<sub>r</sub> = 7.68 and 9.19 min.

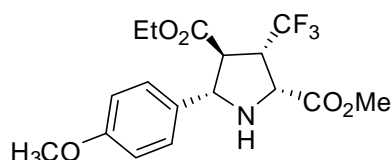

**(5ce)**

**(2R,3S,4S,5S)-4-ethyl 2-methyl 5-(4-methoxyphenyl)-3-(trifluoromethyl)pyrrolidine-2,4-dicarboxylate**

The title compound was prepared according to the general procedure as described above in 75% yield.  $[\alpha]_D^{25} = +18.0$  (*c* 0.14, CHCl<sub>3</sub>); <sup>1</sup>H NMR (CDCl<sub>3</sub>, TMS, 300 MHz)  $\delta$  7.37 (d, *J* = 8.7 Hz, 2H), 6.90 (d, *J* = 8.4 Hz, 2H), 4.25-4.23 (m, 1H), 4.17-4.10 (m, 3H), 3.81(s, 3H), 3.80 (s, 3H), 3.69-3.60 (m, 1H), 3.16-3.10 (m, 1H), 2.50 (brs, 1H), 1.17 (t, *J* = 7.5 Hz, 3H); <sup>13</sup>C NMR (CDCl<sub>3</sub>, TMS, 75 MHz) 171.46, 170.48, 159.59, 130.74, 128.09, 125.88 (q, *J*<sub>CF</sub> = 278.3 Hz), 114.11, 66.40, 61.38,

60.13, 55.16, 52.44, 51.02, 13.93; IR (KBr)  $\nu$  3682, 3583, 3020, 2400, 1735, 1518, 1476, 1425, 1216, 929, 758, 669  $\text{cm}^{-1}$ . The product was analyzed by HPLC to determine the enantiomeric excess: 98% ee >98:2 dr (Chiralcel AD-H, *i*-propanol/hexane = 5/95, flow rate 1.0 mL/min,  $\lambda$  = 220 nm);  $t_r$  = 23.96 and 33.23 min.

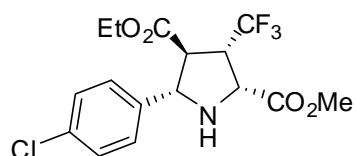

**(5cg)**

**(2*R*,3*S*,4*S*,5*S*)-4-ethyl 2-methyl 5-(4-chlorophenyl)-3-(trifluoromethyl)pyrrolidine-2,4-dicarboxylate**

The title compound was prepared according to the general procedure as described above in 85% yield.  $[\alpha]_D^{25} = +17.3$  (*c* 1.00,  $\text{CHCl}_3$ );  $^1\text{H}$  NMR ( $\text{CDCl}_3$ , TMS, 300 MHz)  $\delta$  7.42-7.33 (m, 4H), 4.29 (d,  $J$  = 9.0 Hz, 1H), 4.18-4.12 (m, 3H), 3.81 (s, 3H), 3.69-3.60 (m, 1H), 3.14-3.09 (m, 1H), 2.49 (brs, 1H), 1.19 (t,  $J$  = 7.5 Hz, 3H);  $^{13}\text{C}$  NMR ( $\text{CDCl}_3$ , TMS, 150 MHz) 171.18, 170.41, 137.60, 134.15, 128.92, 128.37, 125.74 (q,  $J_{\text{CF}}$  = 278.3 Hz), 65.93, 61.61, 60.12, 52.66, 52.55, 50.95 (q,  $J_{\text{CF}}$  = 26.9 Hz), 13.99; IR (KBr)  $\nu$  3681, 3583, 3020, 2400, 2256, 1735, 1523, 1216, 1089, 909, 765, 669  $\text{cm}^{-1}$ . The product was analyzed by HPLC to determine the enantiomeric excess: 99% ee (Chiralcel AS-H, *i*-propanol/hexane = 5/95, flow rate 1.0 mL/min,  $\lambda$  = 220 nm);  $t_r$  = 13.84 and 18.97 min.

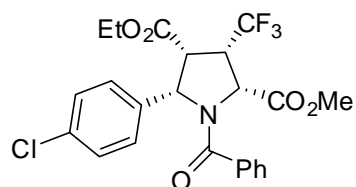

**(6cg)**

**(2*R*,3*S*,4*R*,5*S*)-4-ethyl 2-methyl 1-benzoyl-5-(4-chlorophenyl)-3-(trifluoromethyl)pyrrolidine-2,4-dicarboxylate**

The title compound was prepared according to the general procedure as described

above in 87% yield. m.p. 208 °C;  $[\alpha]_D^{25} = -32.5$  (*c* 1.16, CHCl<sub>3</sub>); <sup>1</sup>H NMR (CDCl<sub>3</sub>, TMS, 300 MHz) δ 7.48-7.24 (m, 9H), 5.61 (m, 1H), 4.82 (m, 1H), 3.87 (s, 3H), 3.75-3.54 (m, 3H), 3.40 (m, 1H), 0.83 (t, *J* = 7.2 Hz, 3H); <sup>13</sup>C NMR (CDCl<sub>3</sub>, TMS, 75 MHz) 171.31, 168.39, 167.55, 135.51, 135.21, 133.43, 130.26, 128.66, 128.34, 128.07, 126.47, 123.45 (q, *J*<sub>CF</sub> = 277.1 Hz), 64.24, 61.05, 60.29, 52.43, 48.33, 31.16, 13.35; IR (KBr) ν 3683, 3583, 3020, 2400, 1751, 1655, 1523, 1216, 1017, 929, 747, 669 cm<sup>-1</sup>. The product was analyzed by HPLC to determine the enantiomeric excess: 99% ee (Chiralcel AD-H, *i*-propanol/hexane = 10/90, flow rate 1.0 mL/min, λ = 220 nm); *t*<sub>r</sub> = 22.67 and 69.76 min.

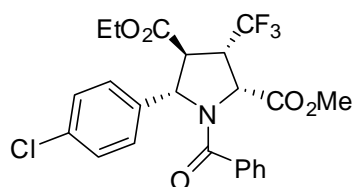

**(7cg)**

**(2*R*,3*S*,4*S*,5*S*)-4-ethyl 2-methyl 1-benzoyl-5-(4-chlorophenyl)-3-(trifluoromethyl)pyrrolidine-2,4-dicarboxylate**

The title compound was prepared according to the general procedure as described above in 88% yield. m.p. 160 °C;  $[\alpha]_D^{25} = -15.0$  (*c* 0.20, CHCl<sub>3</sub>); <sup>1</sup>H NMR (CDCl<sub>3</sub>, TMS, 300 MHz) δ 7.14 (m, 9H), 5.08 (m, 2H), 4.14-4.10 (m, 2H), 3.87 (s, 3H), 3.64-3.49 (m, 2H), 1.13 (t, *J* = 6.9 Hz, 3H); <sup>13</sup>C NMR (CDCl<sub>3</sub>, TMS, 150 MHz) 170.06, 169.41, 136.92, 134.97, 133.68, 129.92, 128.51, 127.98, 126.45, 123.87 (q, *J*<sub>CF</sub> = 277.2 Hz), 67.24, 61.91, 59.35, 52.88, 50.17, 47.15, 13.77; IR (KBr) ν 3684, 3586, 3019, 2400, 1724, 1650, 1525, 1216, 1019, 929, 747, 669 cm<sup>-1</sup>. The product was analyzed by HPLC to determine the enantiomeric excess: 98% ee (Chiralcel AS-H, *i*-propanol/hexane = 20/80, flow rate 1.0 mL/min, λ = 220 nm); *t*<sub>r</sub> = 16.50 and 26.73 min.

### X-ray crystal structures of (2*R*,3*S*,4*R*,5*S*)-**6cg** and (2*R*,3*S*,4*S*,5*S*)-**7cg**

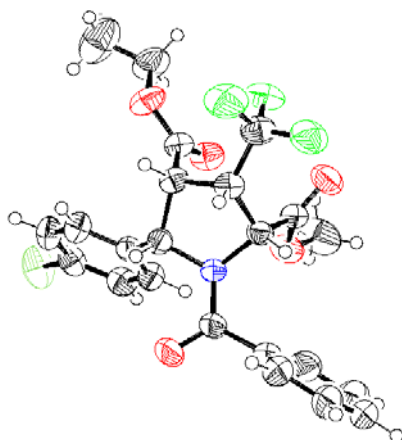

**Figure 1.** X-ray crystal of (2*R*,3*S*,4*R*,5*S*)-**6cg**.

For (2*R*,3*S*,4*R*,5*S*)-**6cg**: CCDC 827404, C<sub>23</sub>H<sub>21</sub>ClF<sub>3</sub>NO<sub>5</sub>,  $M_r$  = 483.86,  $T$  = 293 K, Orthorhombic, space group  $P2_12_12_1$ ,  $a$  = 8.6745(12),  $b$  = 13.3919(18),  $c$  = 19.262(3) Å,  $V$  = 2237.6(5) Å<sup>3</sup>,  $Z$  = 4, 12954 reflections measured, 3670 unique ( $R_{\text{int}}$  = 0.0353) which were used in all calculations. The final  $wR_2$  = 0.0845(all data), Flack  $\chi$  = 0.08(7).

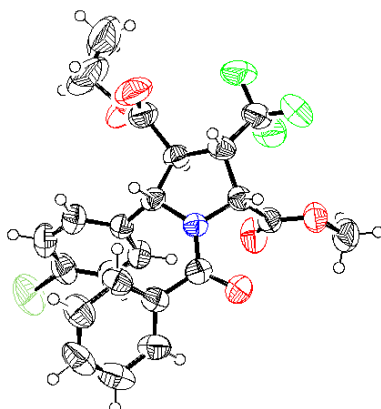

**Figure 2.** X-ray crystal of (2*R*,3*S*,4*R*,5*S*)-**7cg**.

For (2*R*,3*S*,4*S*,5*S*)-**7cg**: CCDC 827405, C<sub>23</sub>H<sub>21</sub>ClF<sub>3</sub>NO<sub>5</sub>,  $M_r$  = 483.86,  $T$  = 293 K, Orthorhombic, space group  $P2_12_12_1$ ,  $a$  = 14.7950(17),  $b$  = 15.6582(17),  $c$  = 20.390(2) Å,  $V$  = 4723.6(9) Å<sup>3</sup>,  $Z$  = 8, 26602 reflections measured, 6467 unique ( $R_{\text{int}}$  = 0.0422) which were used in all calculations. The final  $wR_2$  = 0.0945 (all data), Flack  $\chi$  = -0.02(6).

### Proposed transition states of the *endo*-selectivity for asymmetric 1,3-dipolar cycloaddition of azomethine ylides with *trans* or *cis*-4,4,4-Trifluorocrotonate

Based on the relative and absolute configuration of the cycloadducts, the high *endo*-selectivity observed in the  $\text{Cu}(\text{CH}_3\text{CN})_4\text{BF}_4/\text{TF-BiphamPhos}$  catalyzed asymmetric 1,3-dipolar cycloaddition reaction of azomethine ylide with *trans*- or *cis*-4,4,4-trifluorocrotonate can be rationalized by the proposed tetracoordinated complex<sup>3</sup> shown in Figure 3. The *in situ*-formed azomethine ylide is coordinated to the metallic center and oriented in such transition state because of the steric repulsion between the phenyl group in the ylide and the phenyl ring on the phosphorus atom of the chiral ligand. The highly steric congestion imposed by the latter effectively blocks the dipolarophiles (*trans*- or *cis*-4,4,4-trifluorocrotonate) approach from the *Re* (C=N) face of the azomethine ylide and forms the corresponding *endo*-(2*R*,3*R*,4*R*,5*S*) or *endo*-(2*R*,3*S*,4*R*,5*S*) adduct through *Si* face attack. The carbonyl group of the *trans*- or *cis*-4,4,4-trifluorocrotonate could coordinate with the Cu(I) center, which can stabilize the negatively charged oxygen atom in the proposed transition states.<sup>3</sup> It could not rule out the possible hydrogen bond interaction between the carbonyl group of dipolarophile **1a** and the  $\text{NH}_2$  group of the chiral (*S*)-TF-BiphamPhos ligand (**L1**), which also facilitates stabilizing the proposed transition states.<sup>3b,3c</sup>

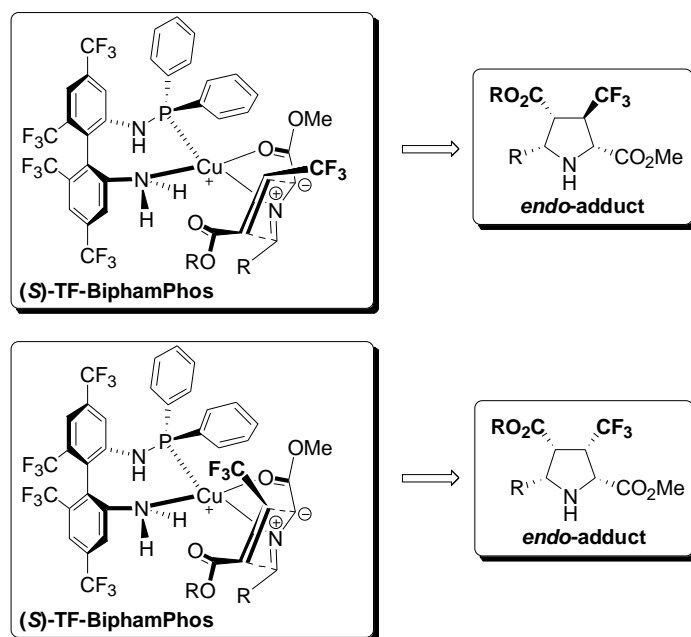

**Figure 3.** Proposed transition states leading to *endo*-adducts.

## References

1. C.-J. Wang, G. Liang, Z.-Y. Xue, F. Gao, *J. Am. Chem. Soc.* **2008**, *130*, 17250.
2. a) B.-L. Wang, F. Yu, X.-L. Qiu, Z. Jiang, F.-L. Qing, *J. Fluorine Chem.* **2006**, *127*, 580; b) E. T. Mcbee, M. J. Keogh, R. P. Levek, E. P. Wesseler, *J. Org. Chem.*, **1973**, *38*, 632; c) S. K. Guha, A. Shibayama, D. Abe, M. Sakaguchi, Y. Ukaji, K. Inomata, *Bull. Chem. Soc. Jpn.*, **2004**, *77*, 2147; d) P. F. Bevilacqua, D. D. Keith, J. L. Roberts, *J. Org. Chem.*, **1984**, *49*, 1430; e) B. C. Hamper, *Org. Synth.*, **1998**, *49*, 1430; f) J. Leroy, N. Fischer, C. Wakselman, *J. Chem. Soc. Perkin Trans. 1* **1990**, 1281.
3. a) S. Cabrera, R. G. Arrayás, B. Martín-Matute, F. P. Cossío, J. C. Carretero, *Tetrahedron* **2007**, *63*, 6587; b) C. Nájera, M. D. G. Retamosa, J. Sansano, *Angew. Chem., Int. Ed.* **2008**, *47*, 6055; c) X.-X. Yan, Q. Peng, Y. Zhang, K. Zhang, W. Hong, X.-L. Hou, Y.-D. Wu, *Angew. Chem., Int. Ed.* **2006**, *45*, 1979.

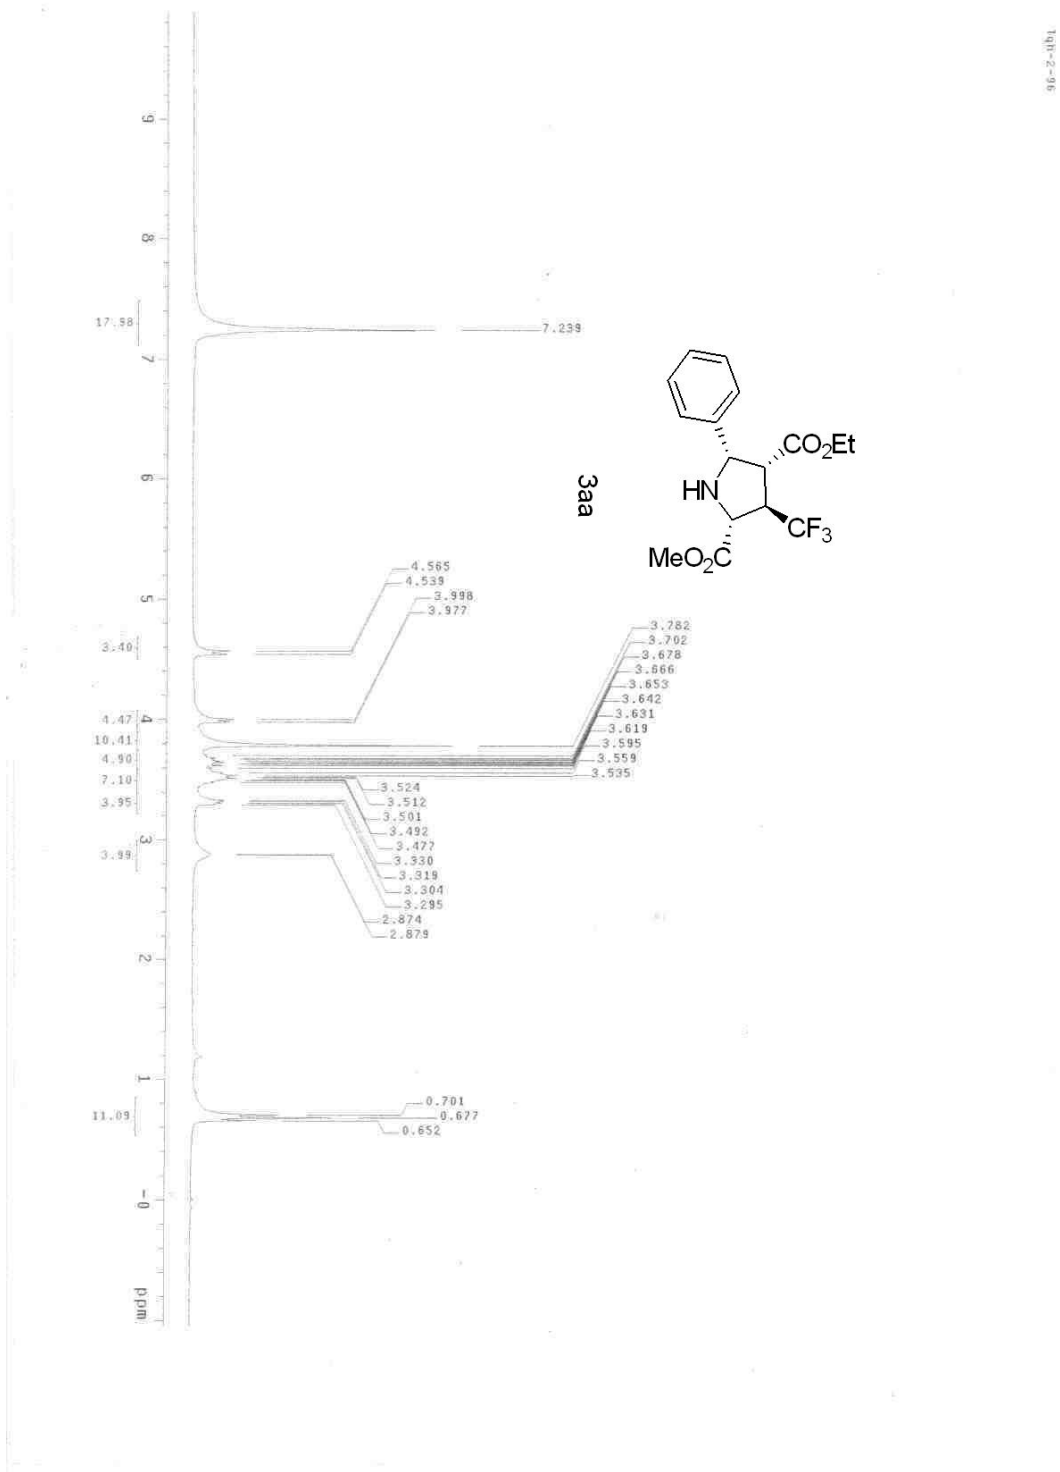

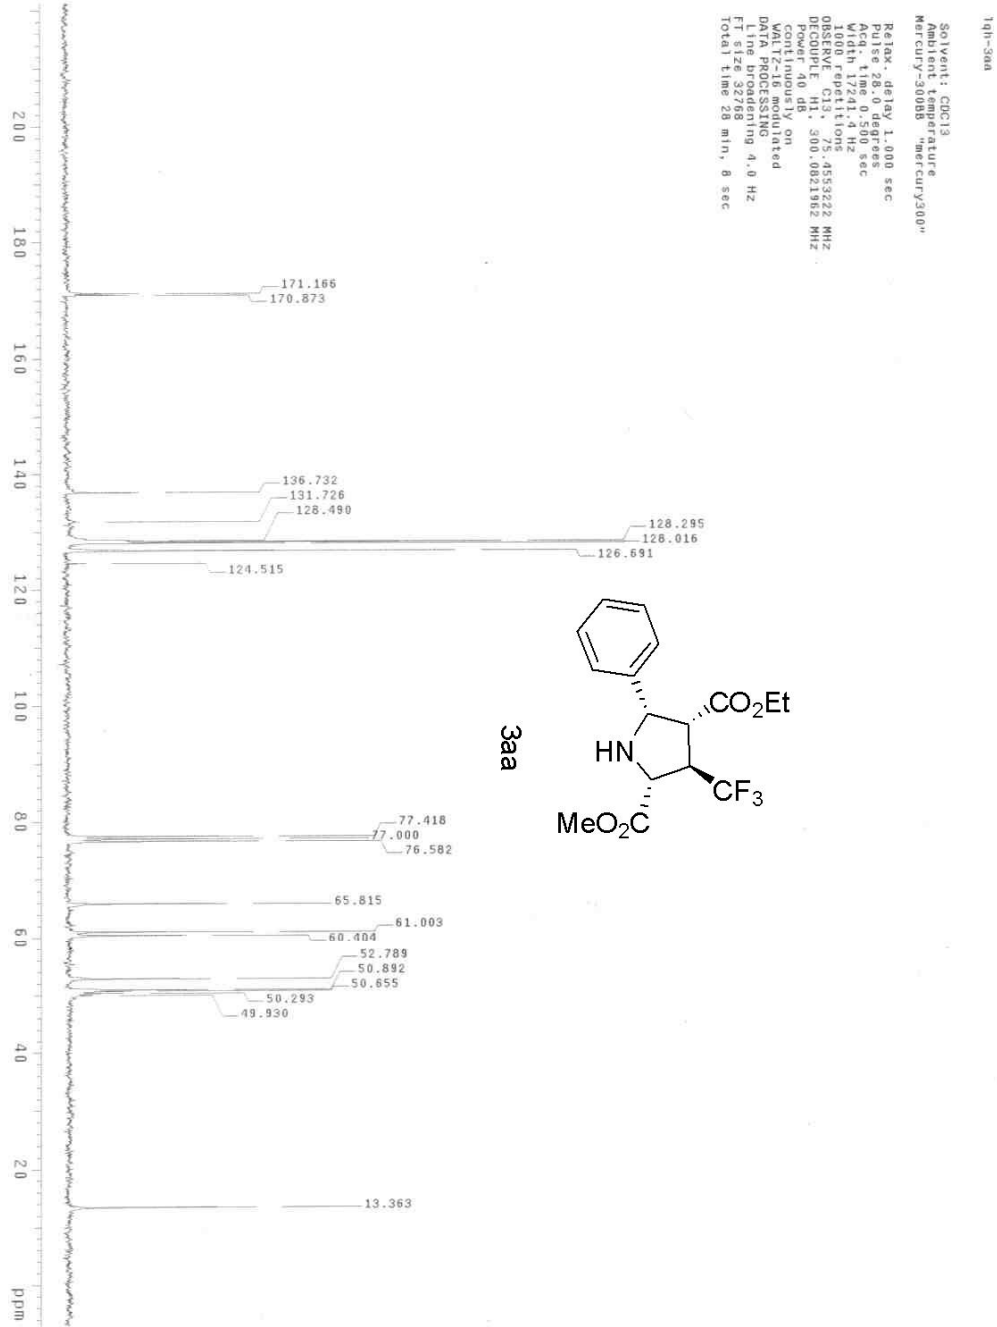



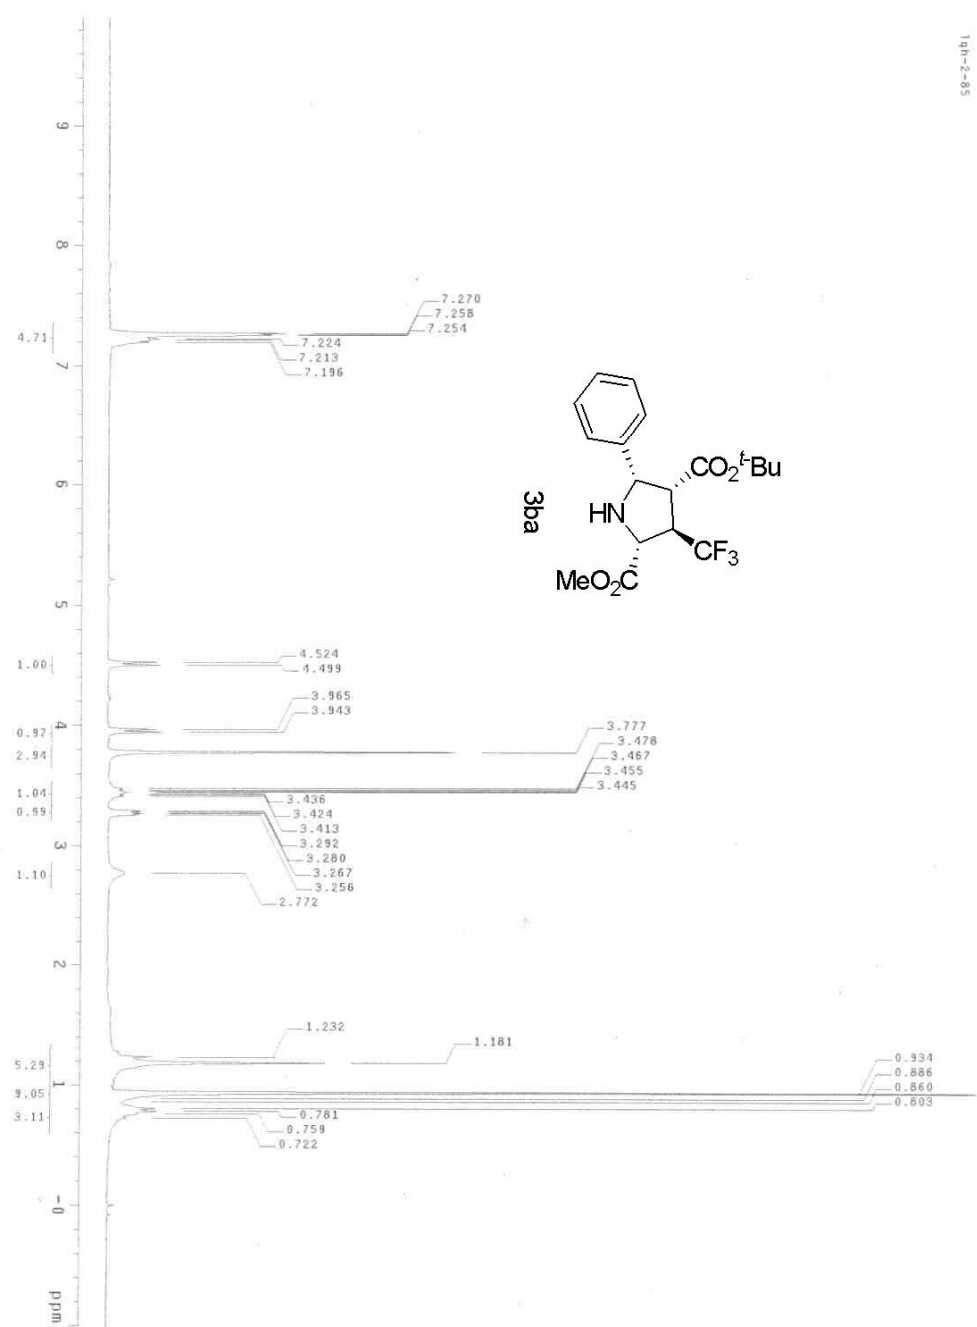

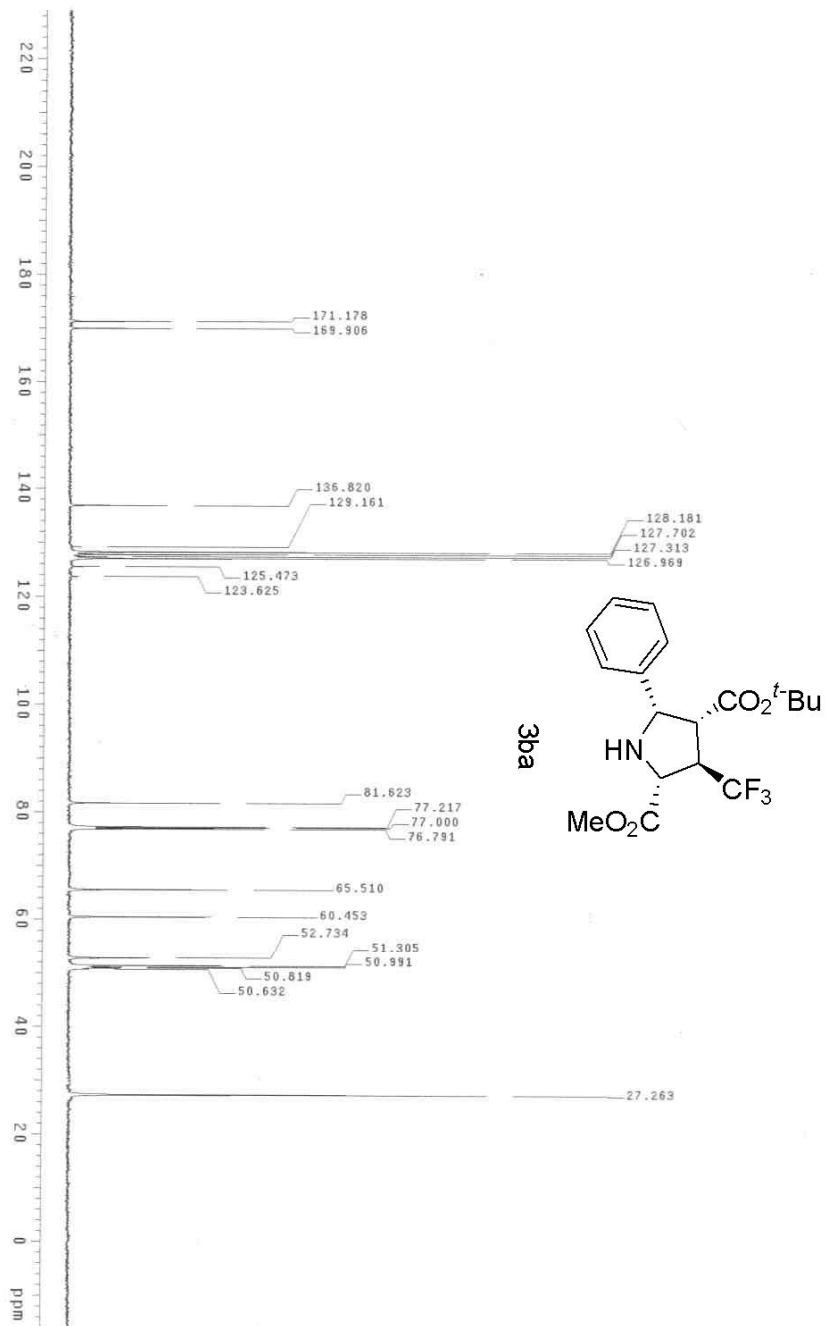

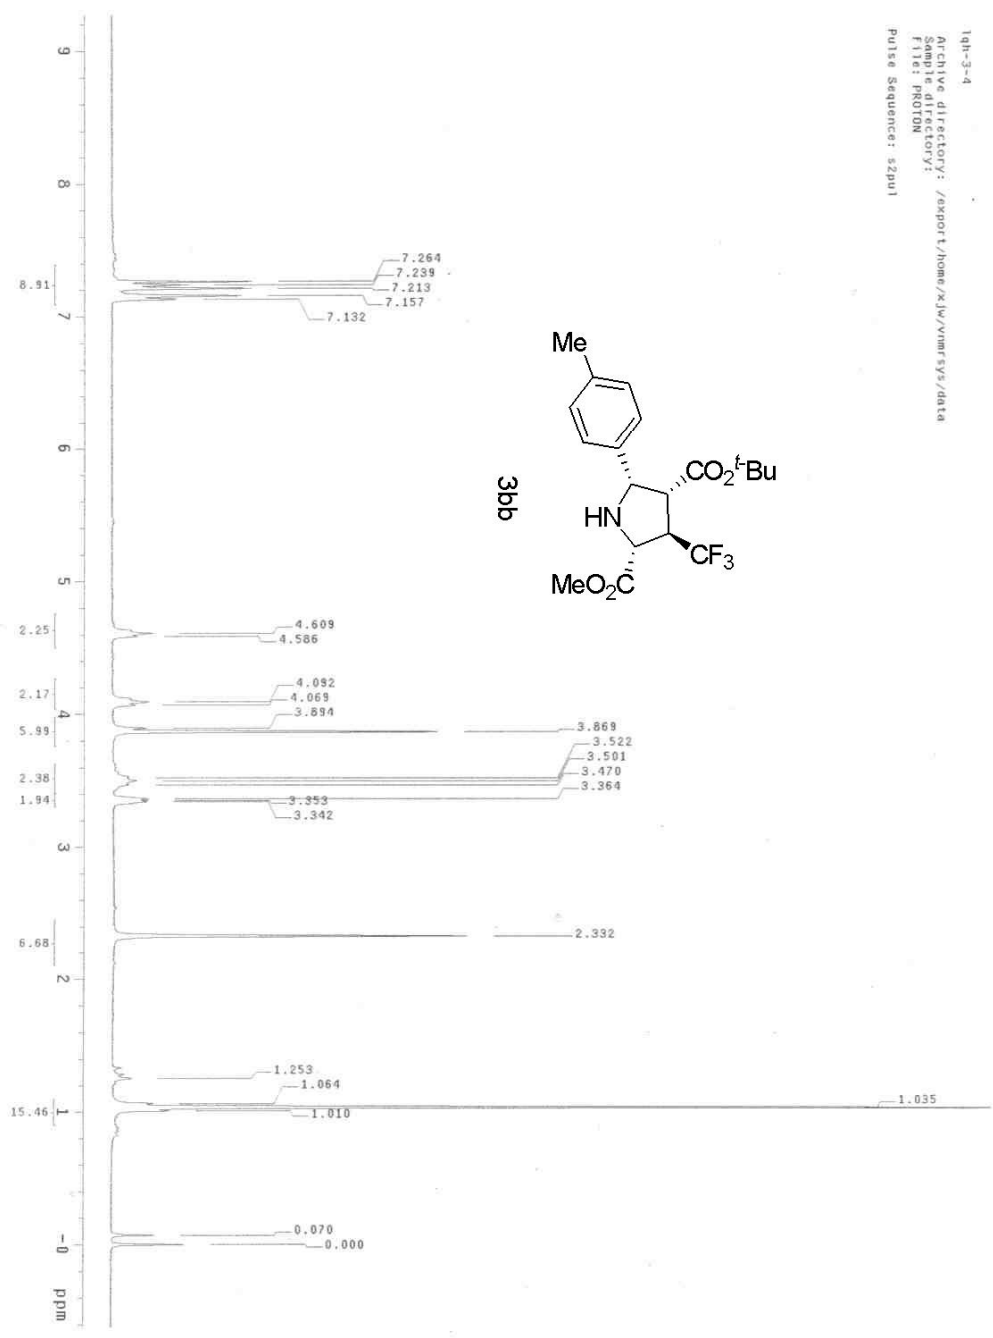

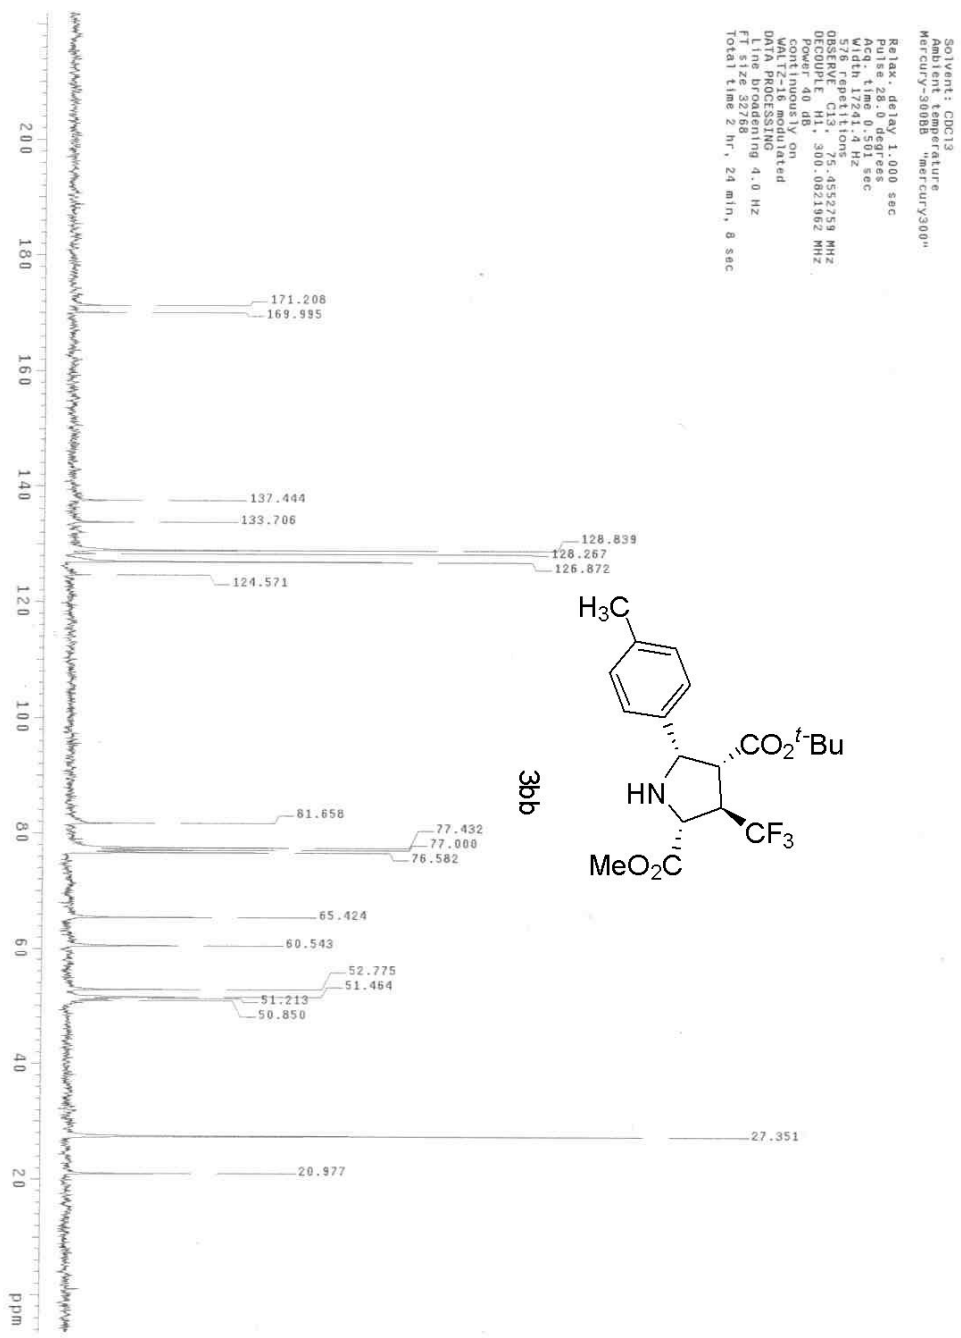

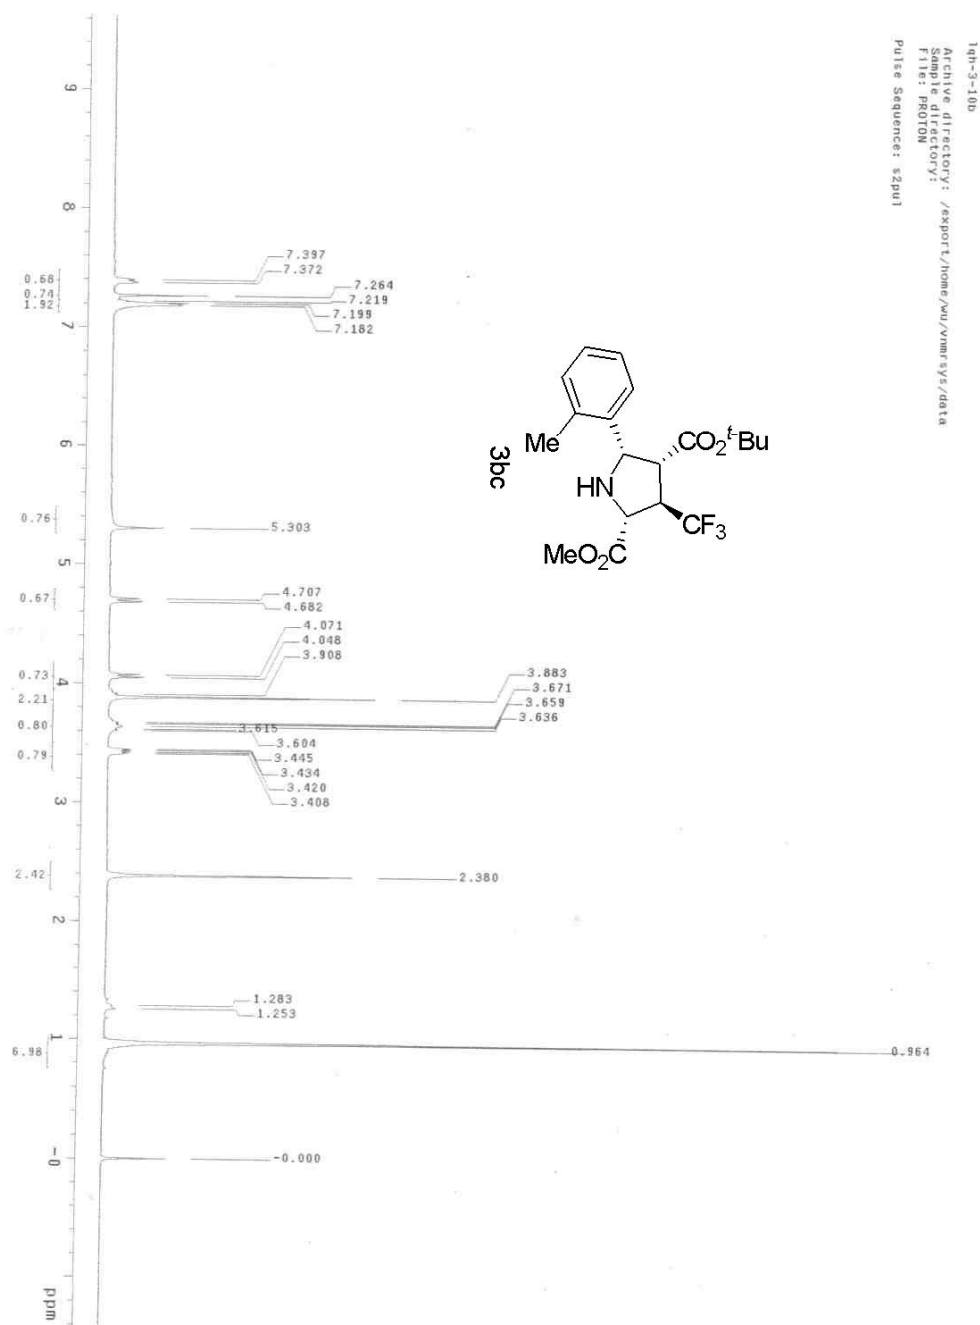

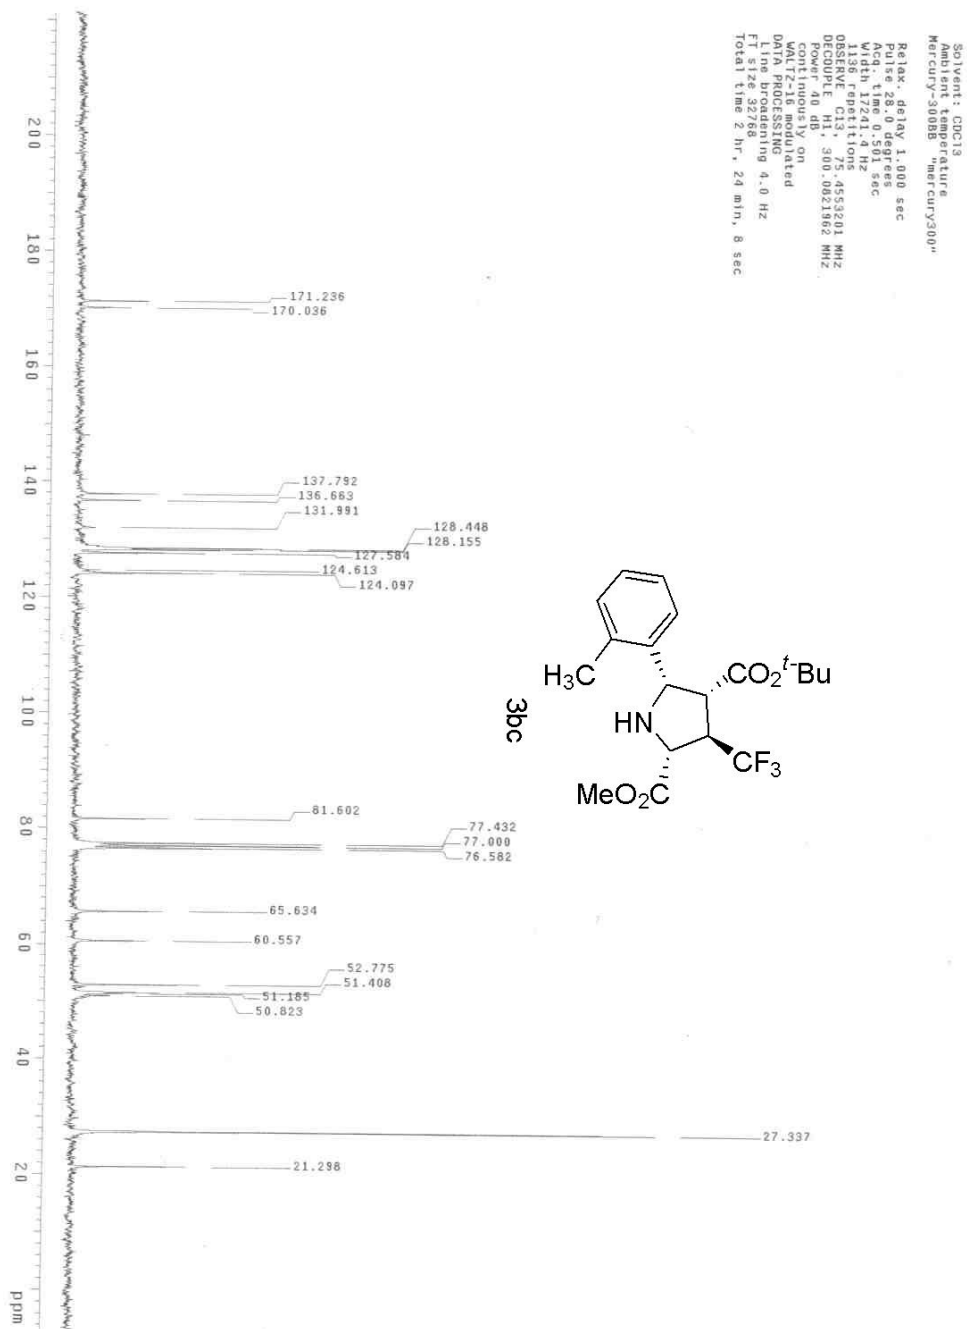

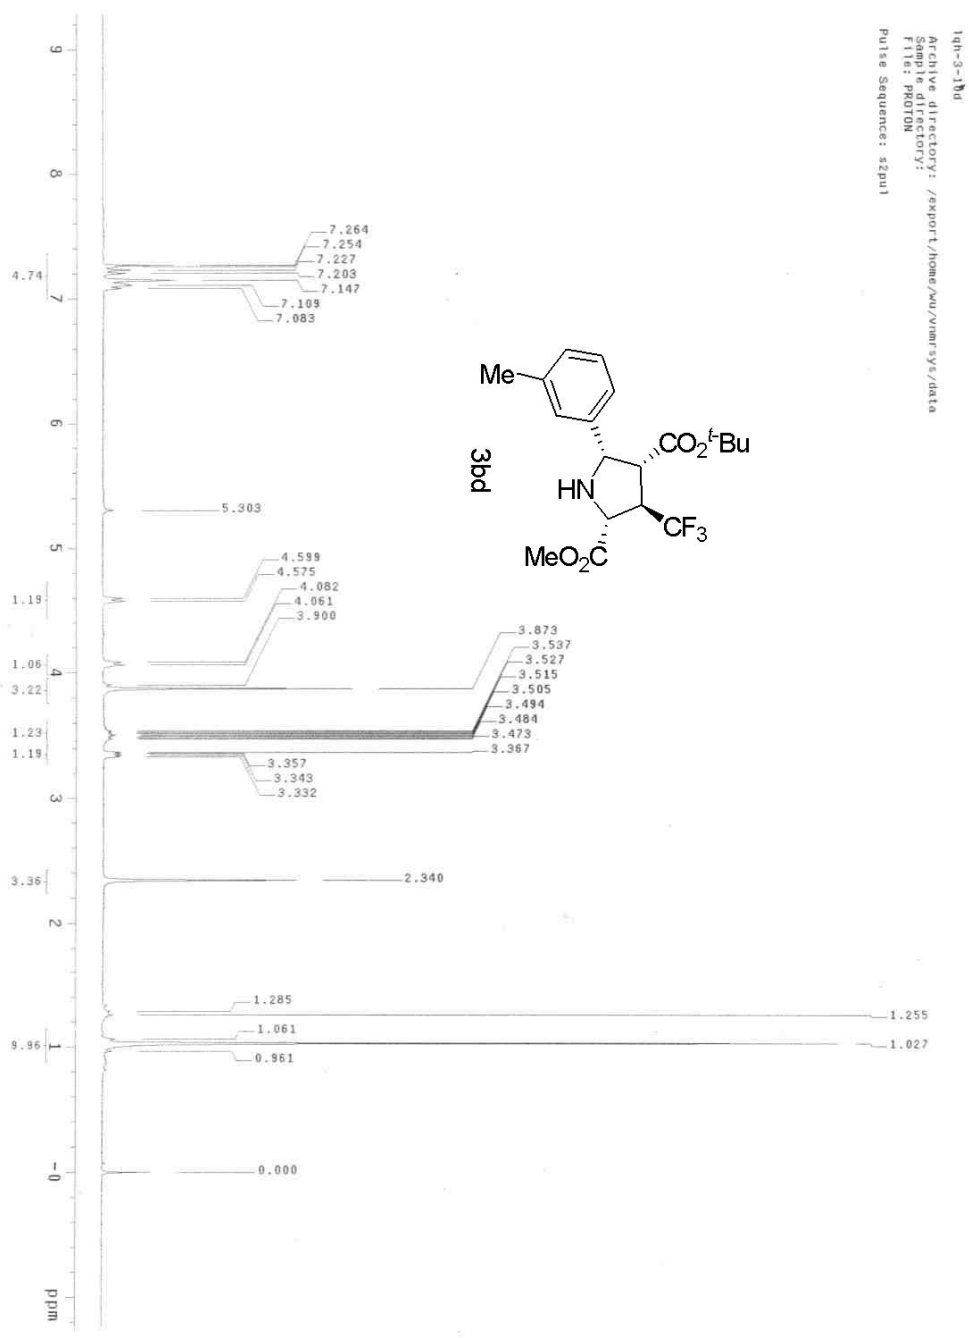

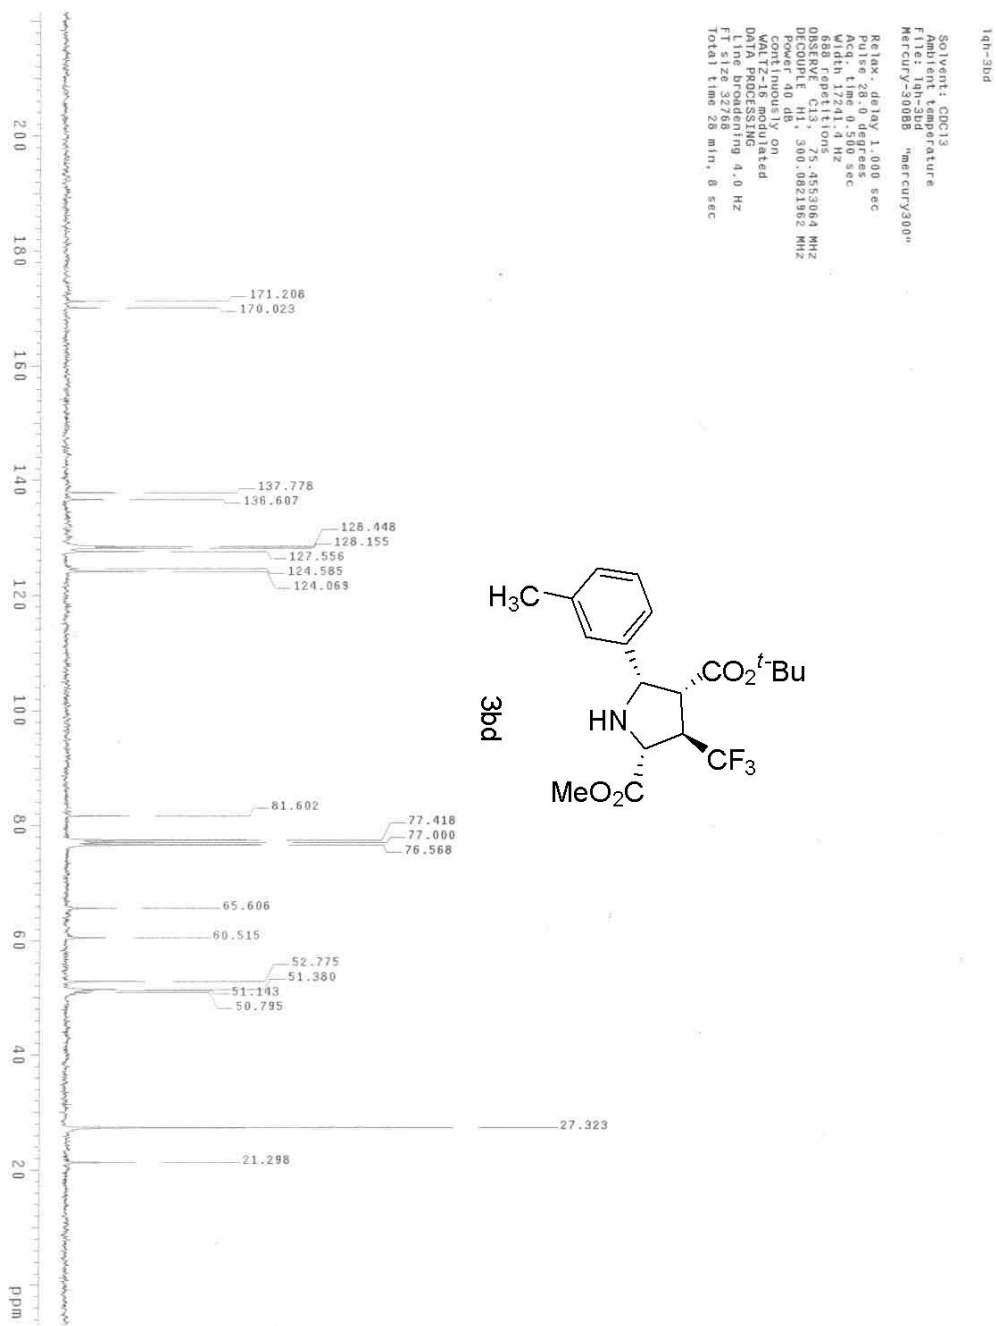



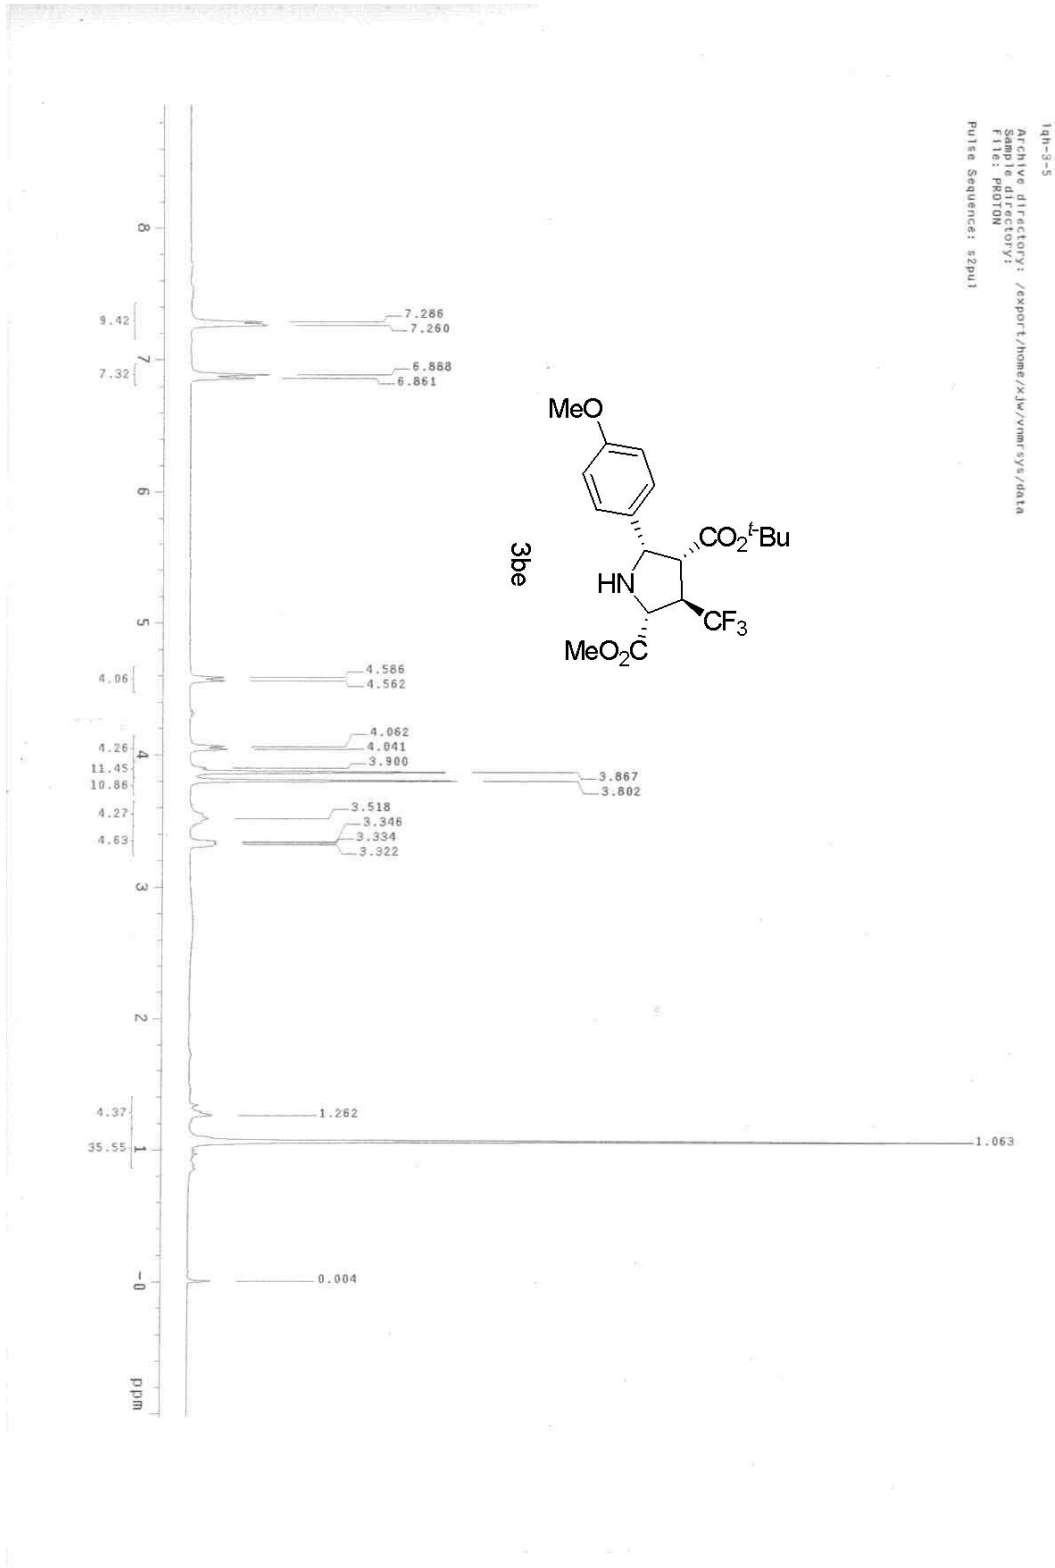

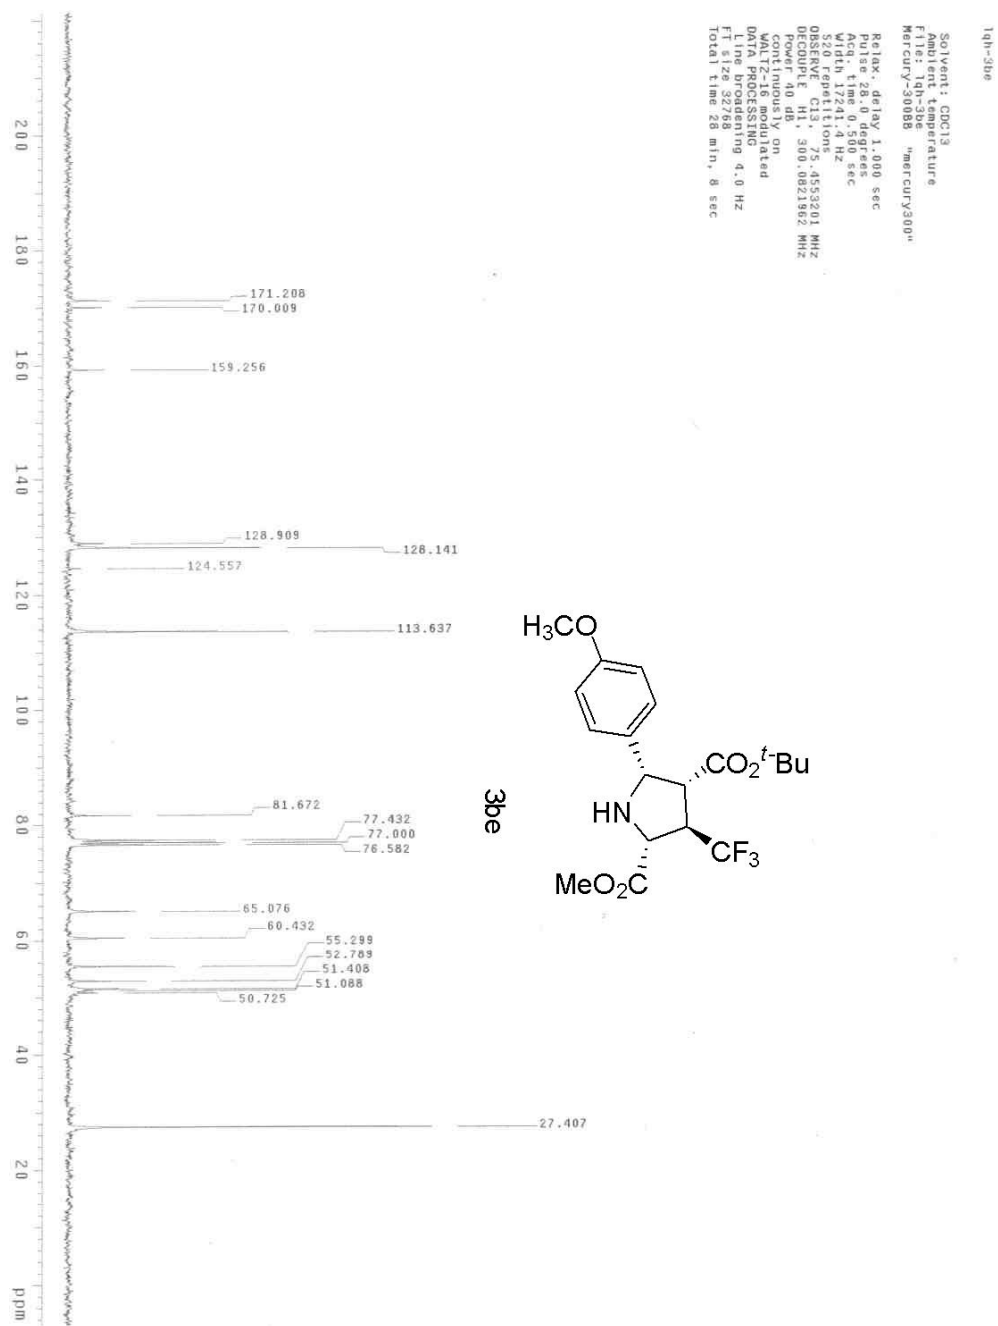

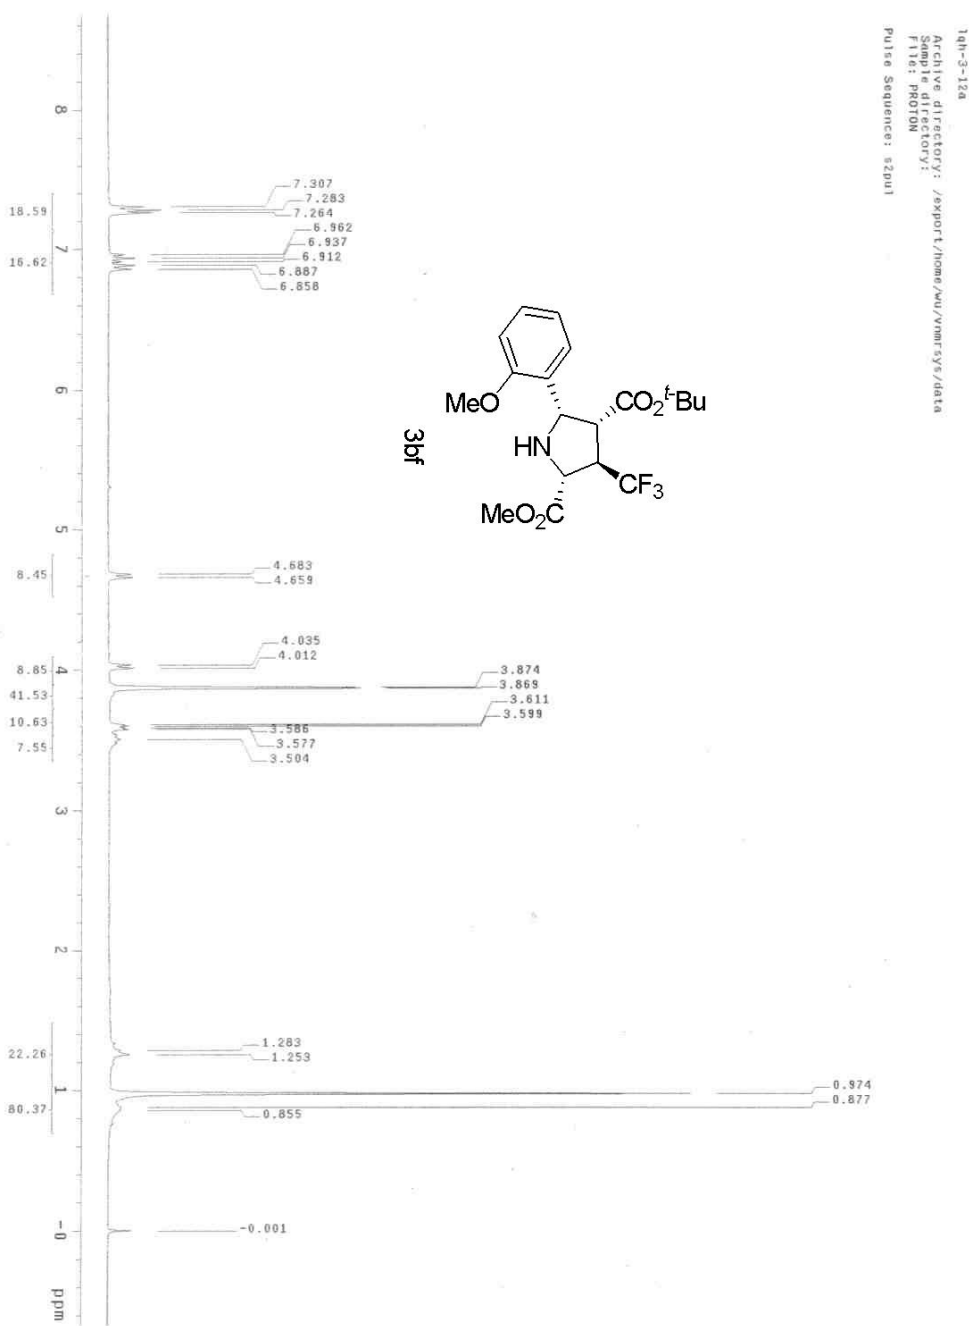

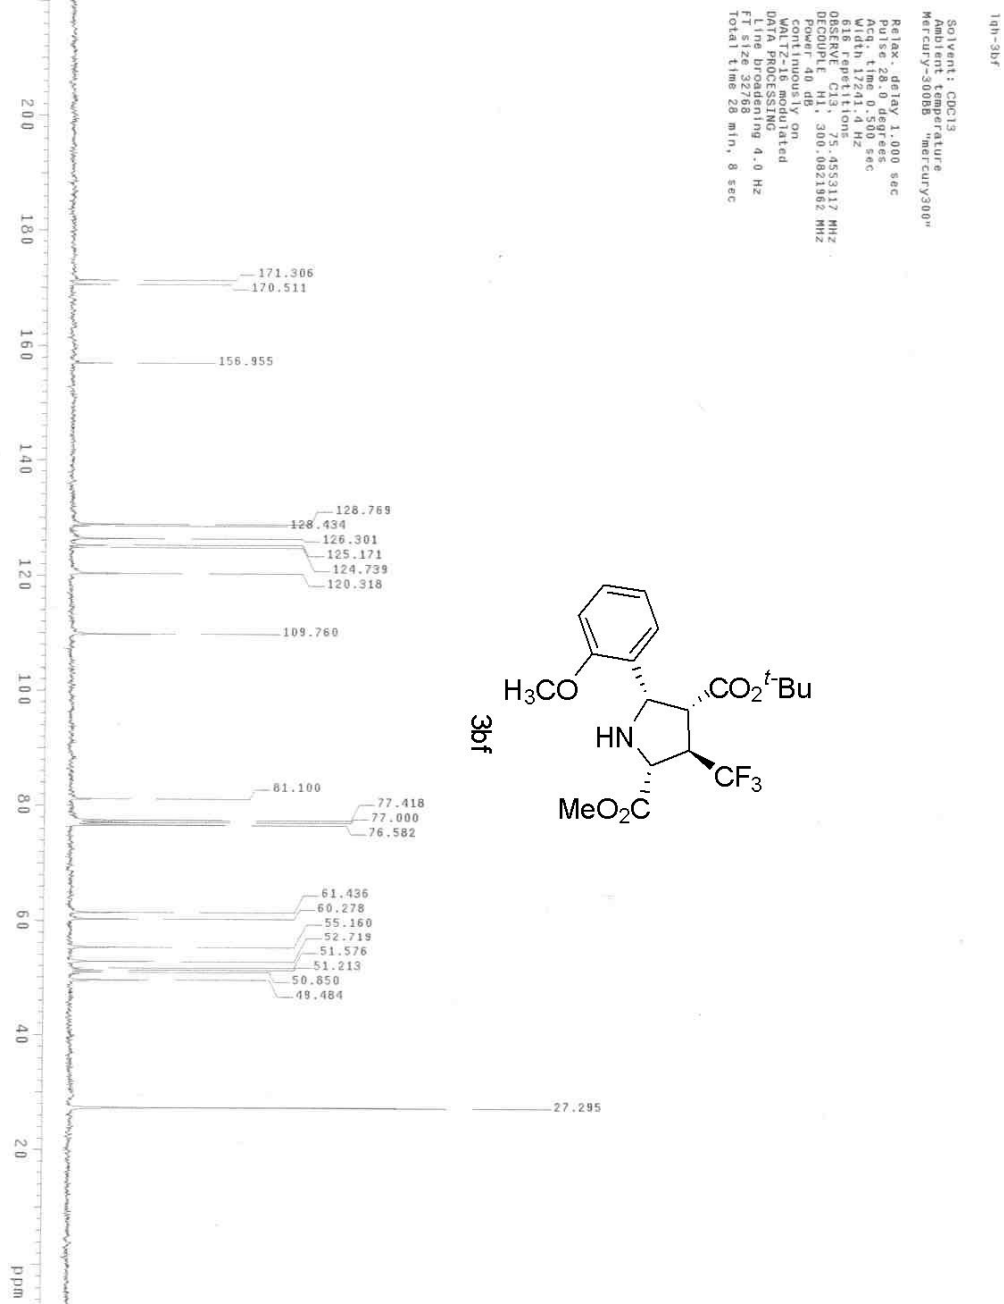

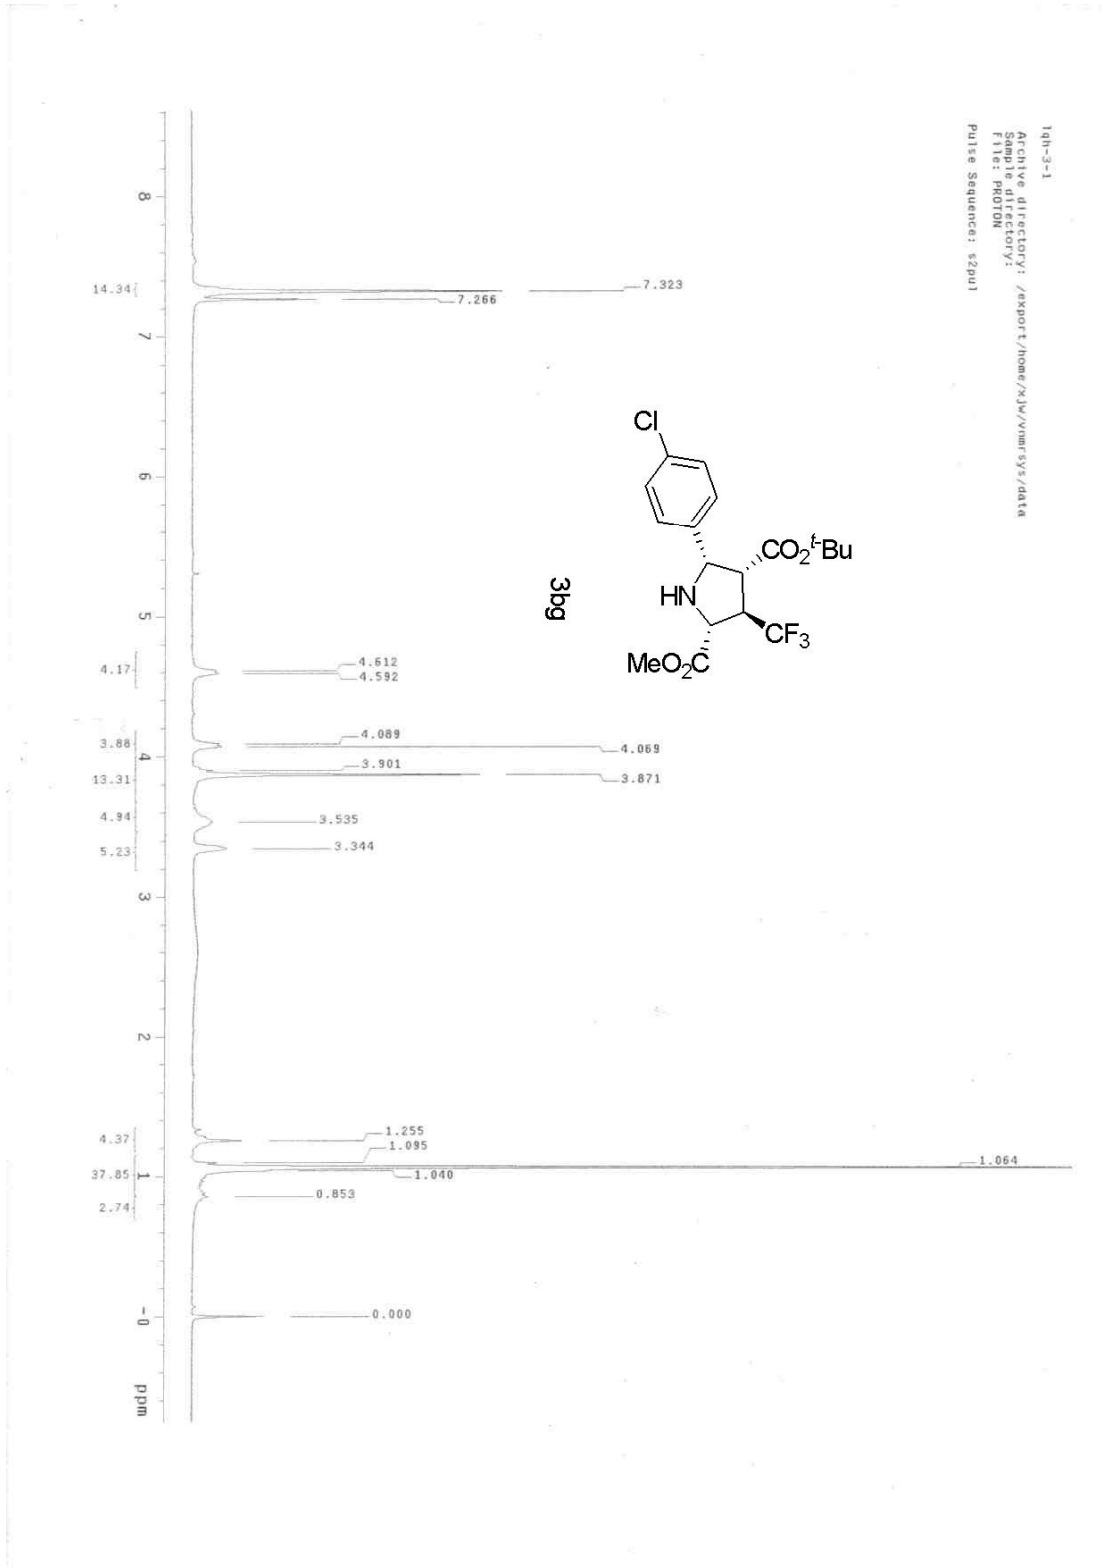

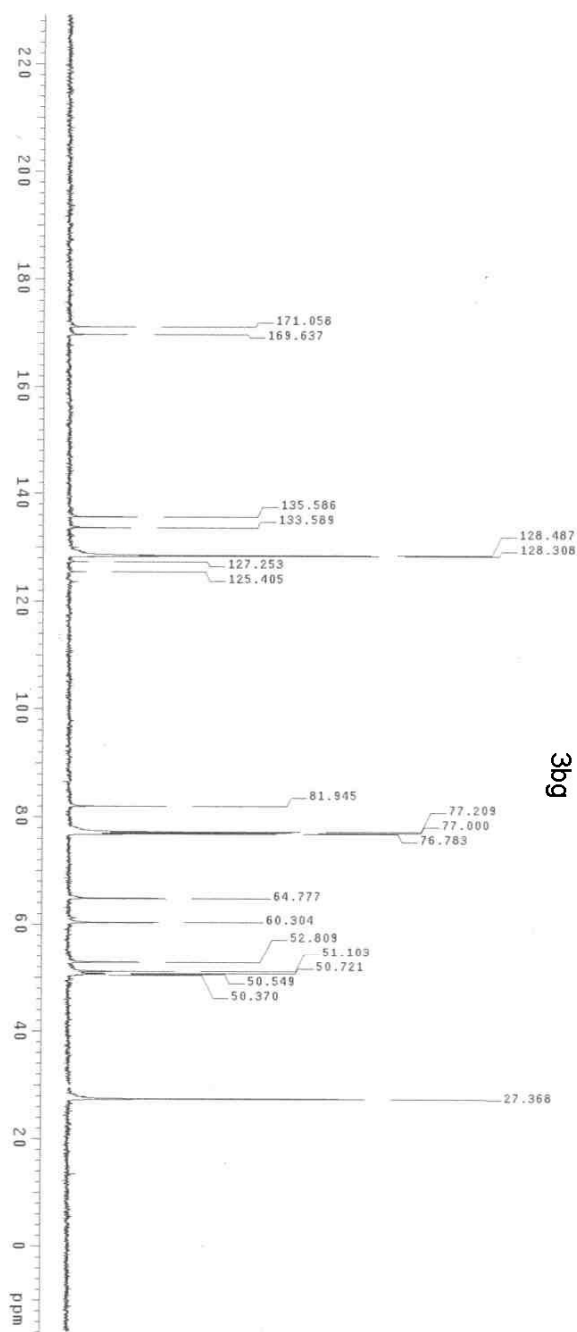

3bg

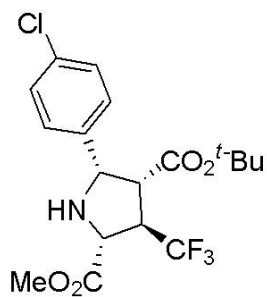

c13-1q1-3bg

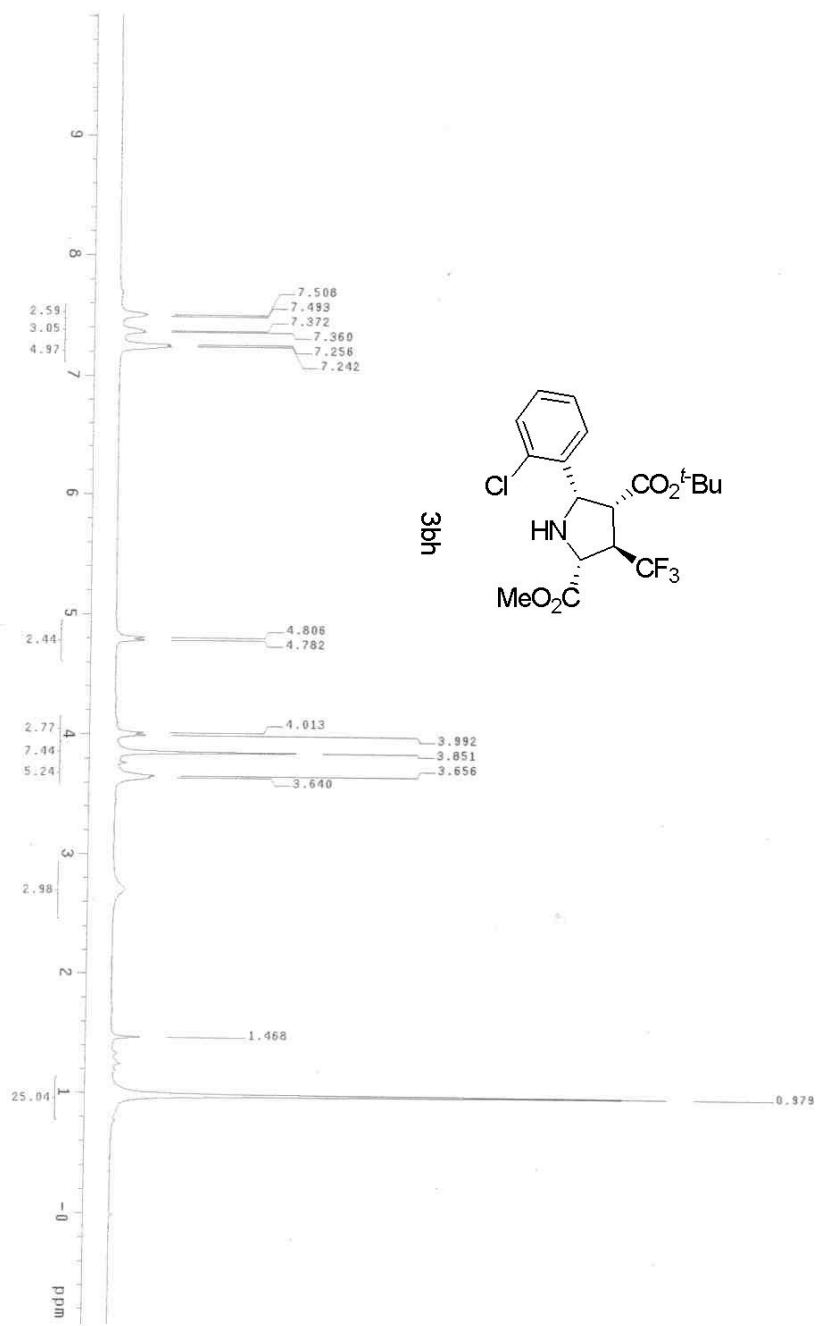

1qh-3-10a  
Archive directory: /export/home/nu/vmr/sys/data  
Sample directory:  
File: PROTON  
Pulse Sequence: szput

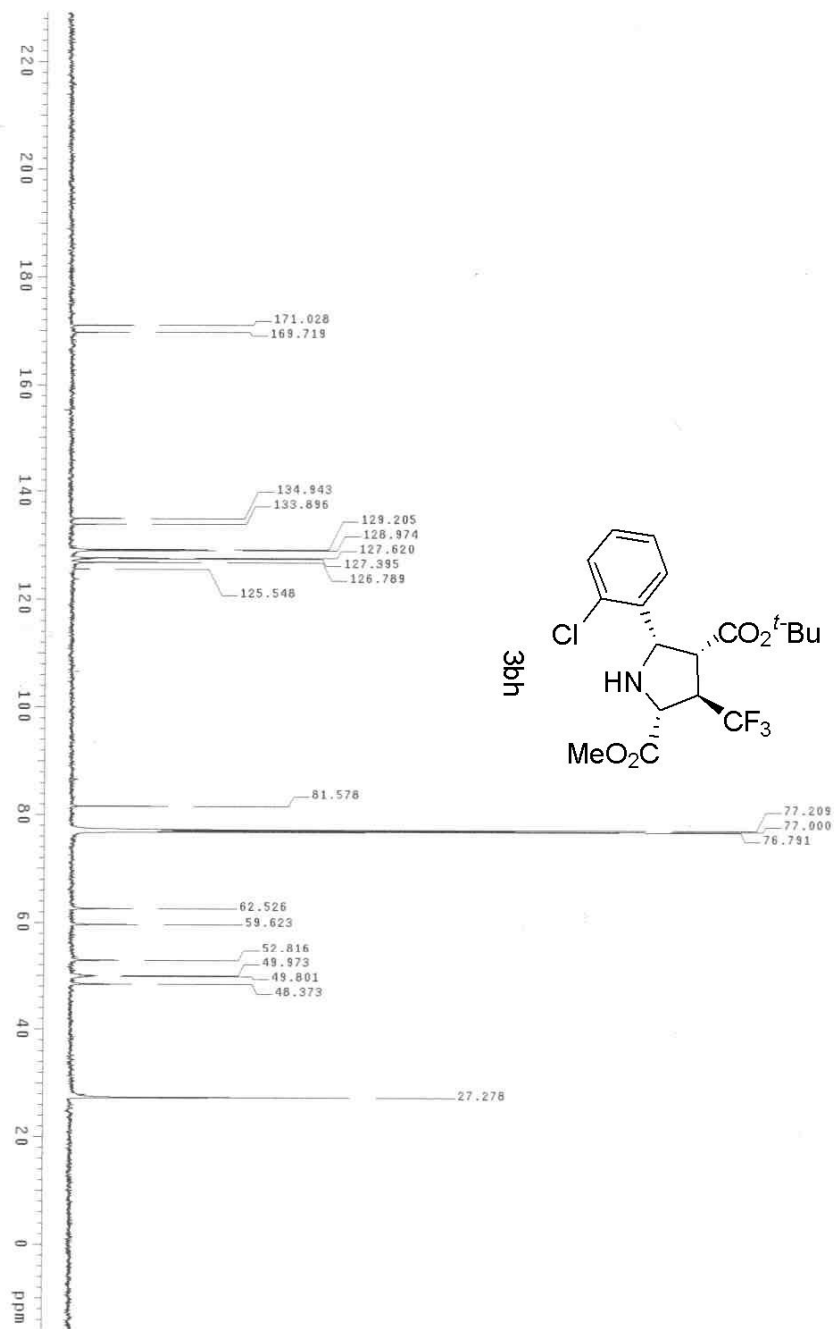



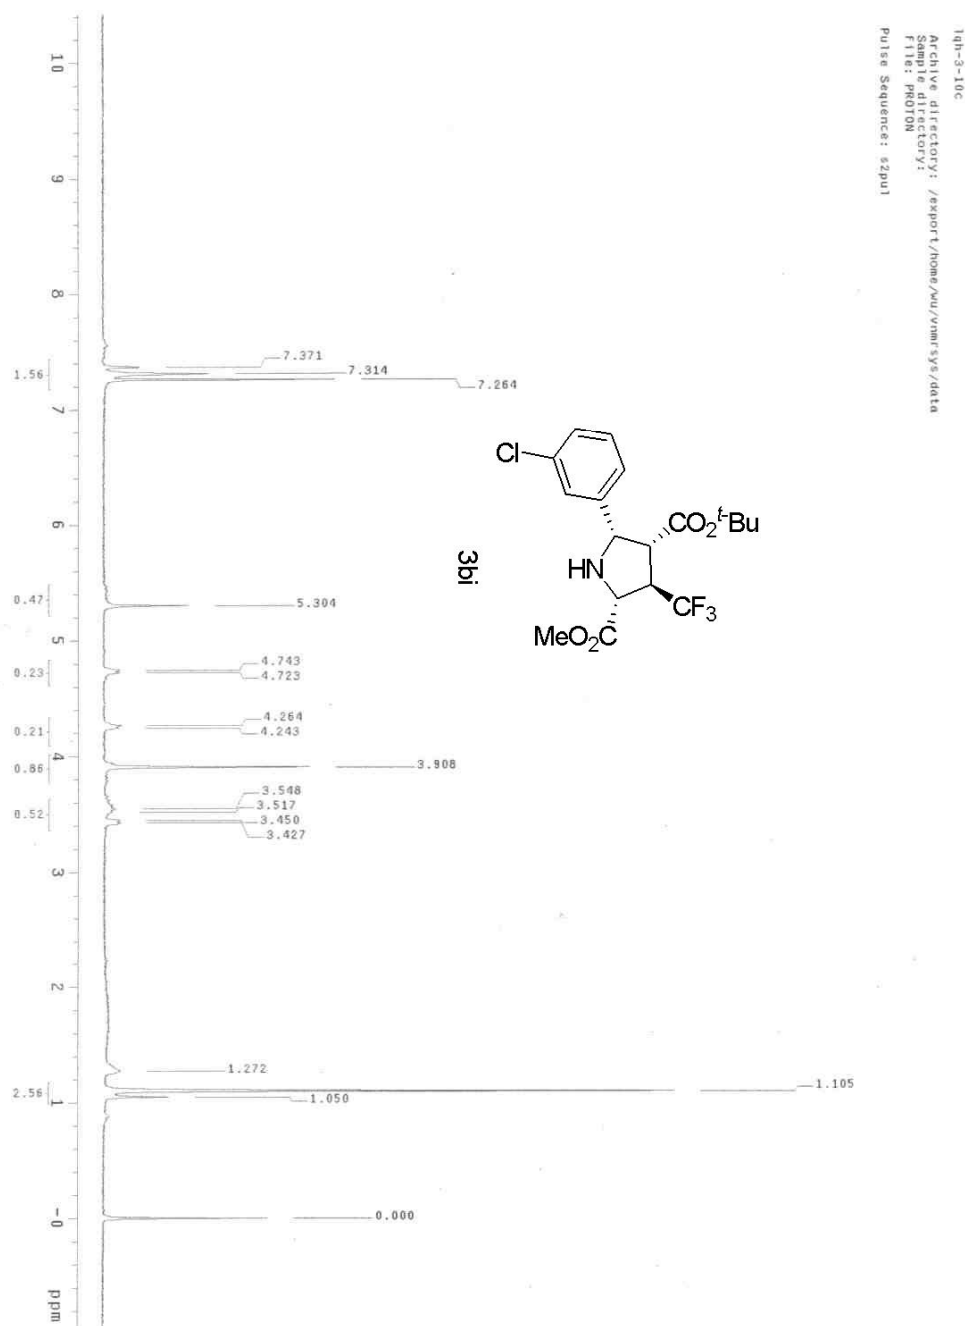

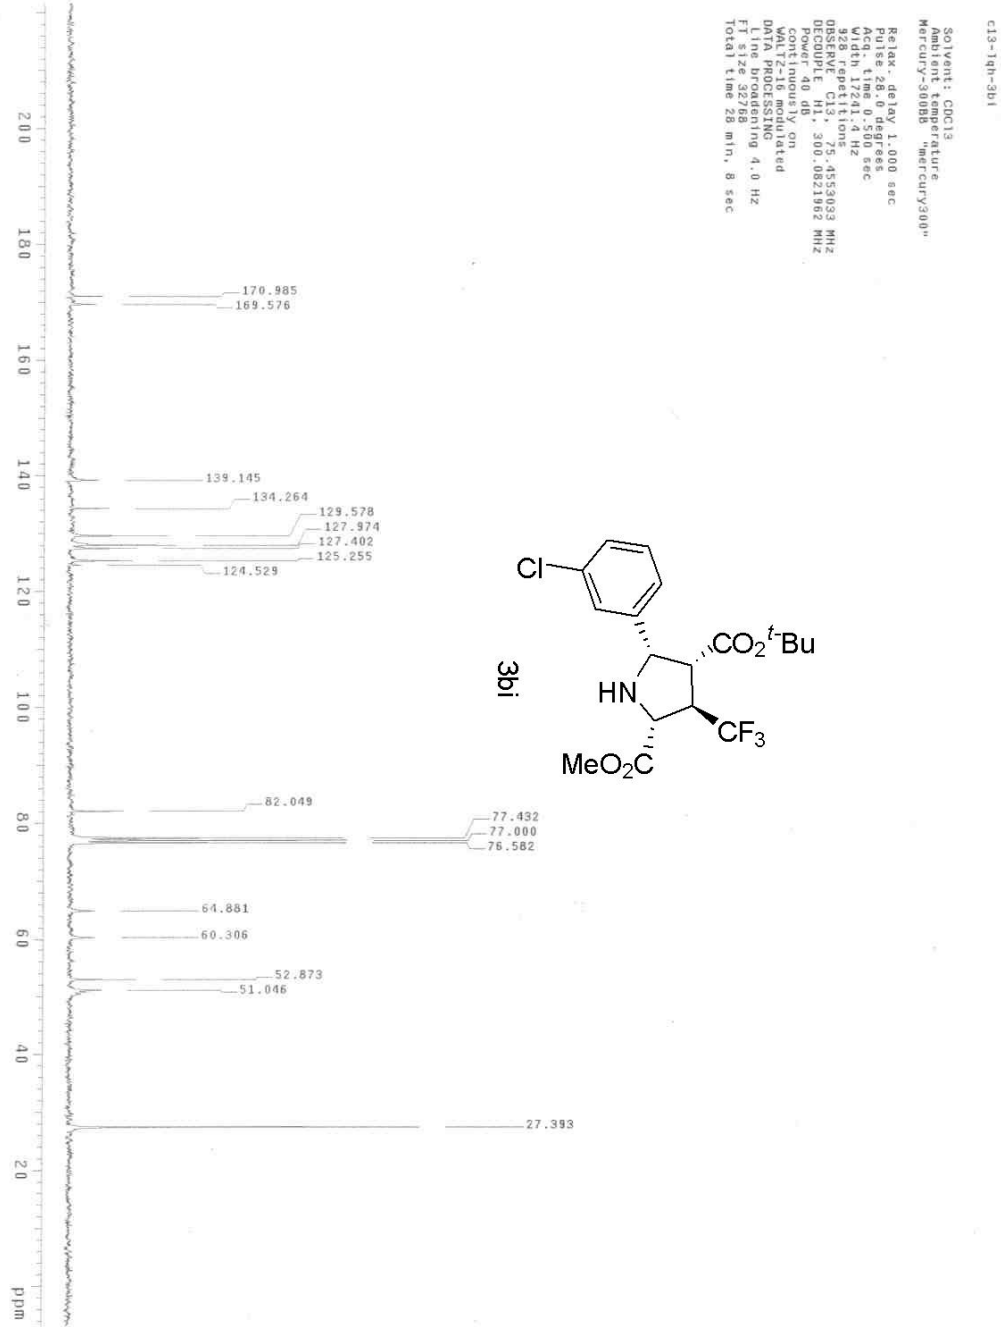

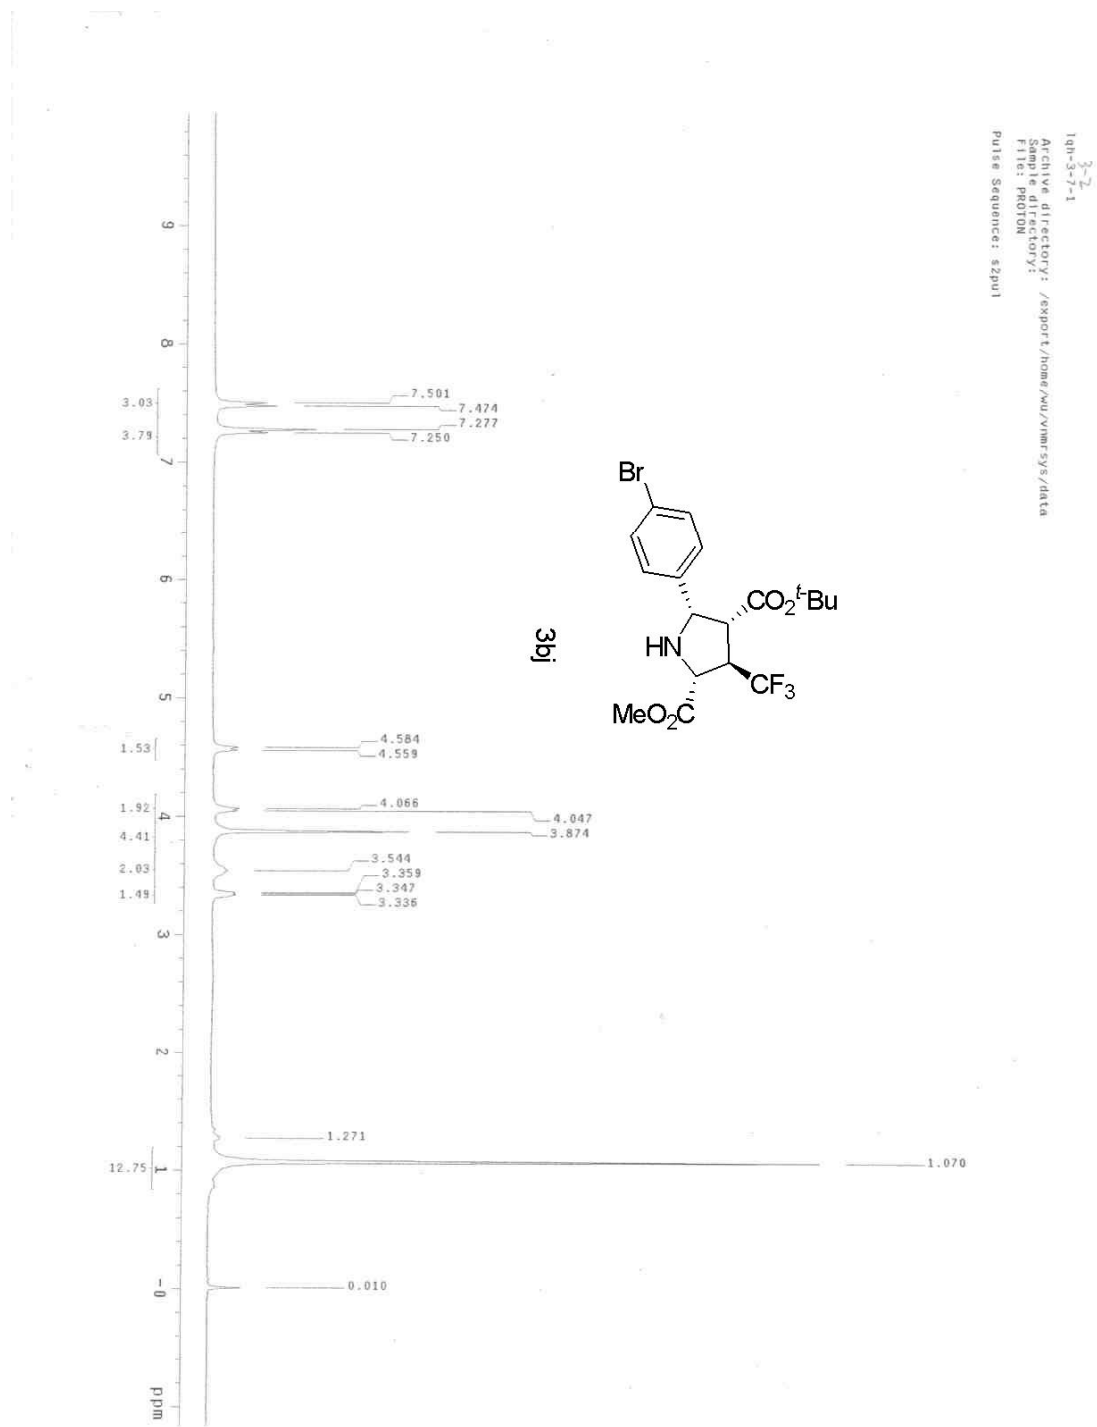

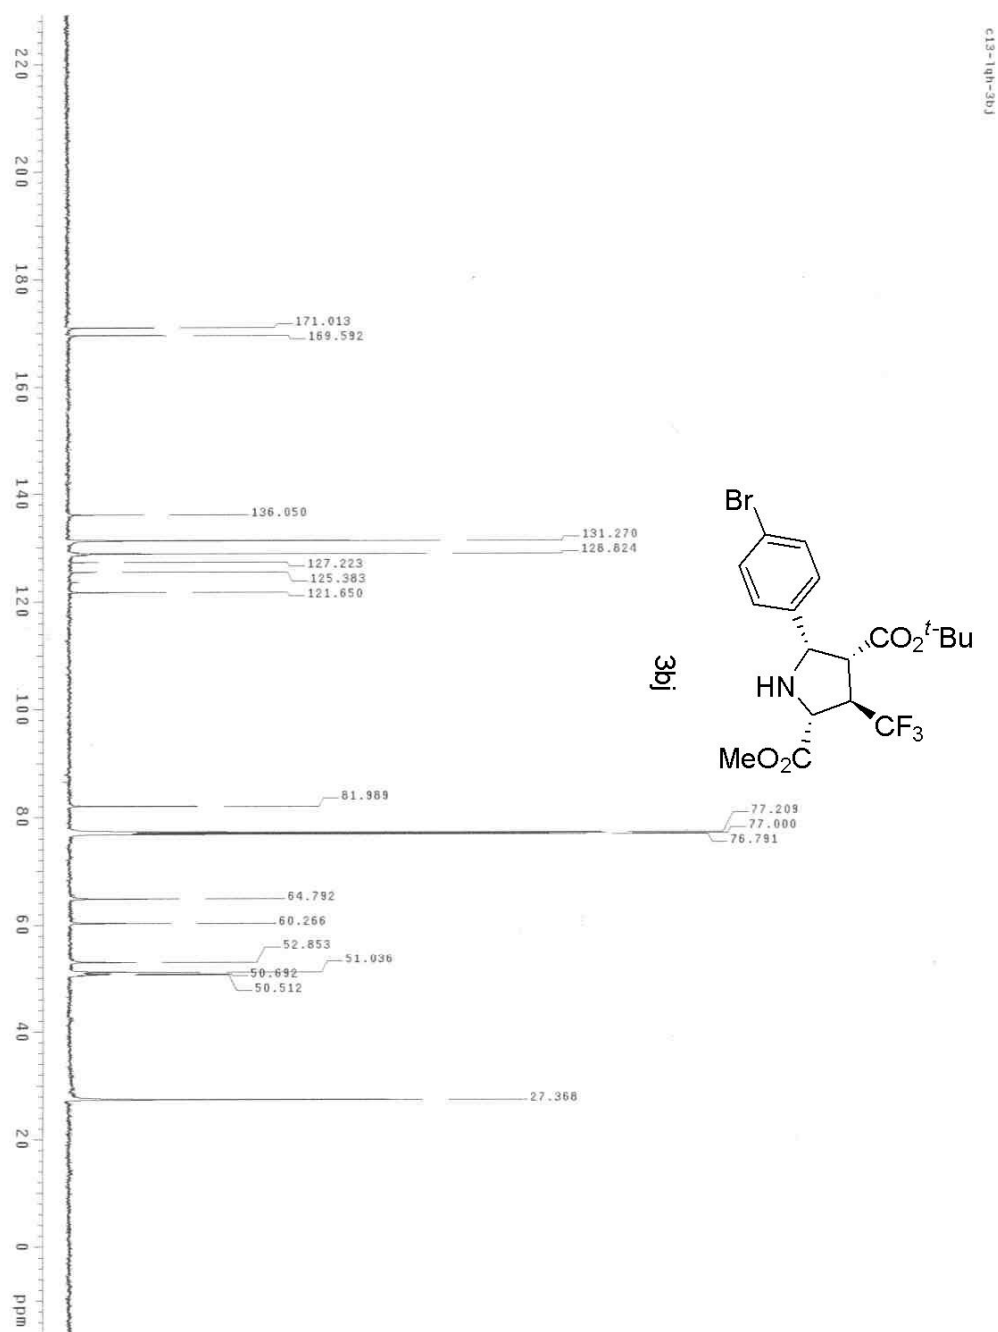

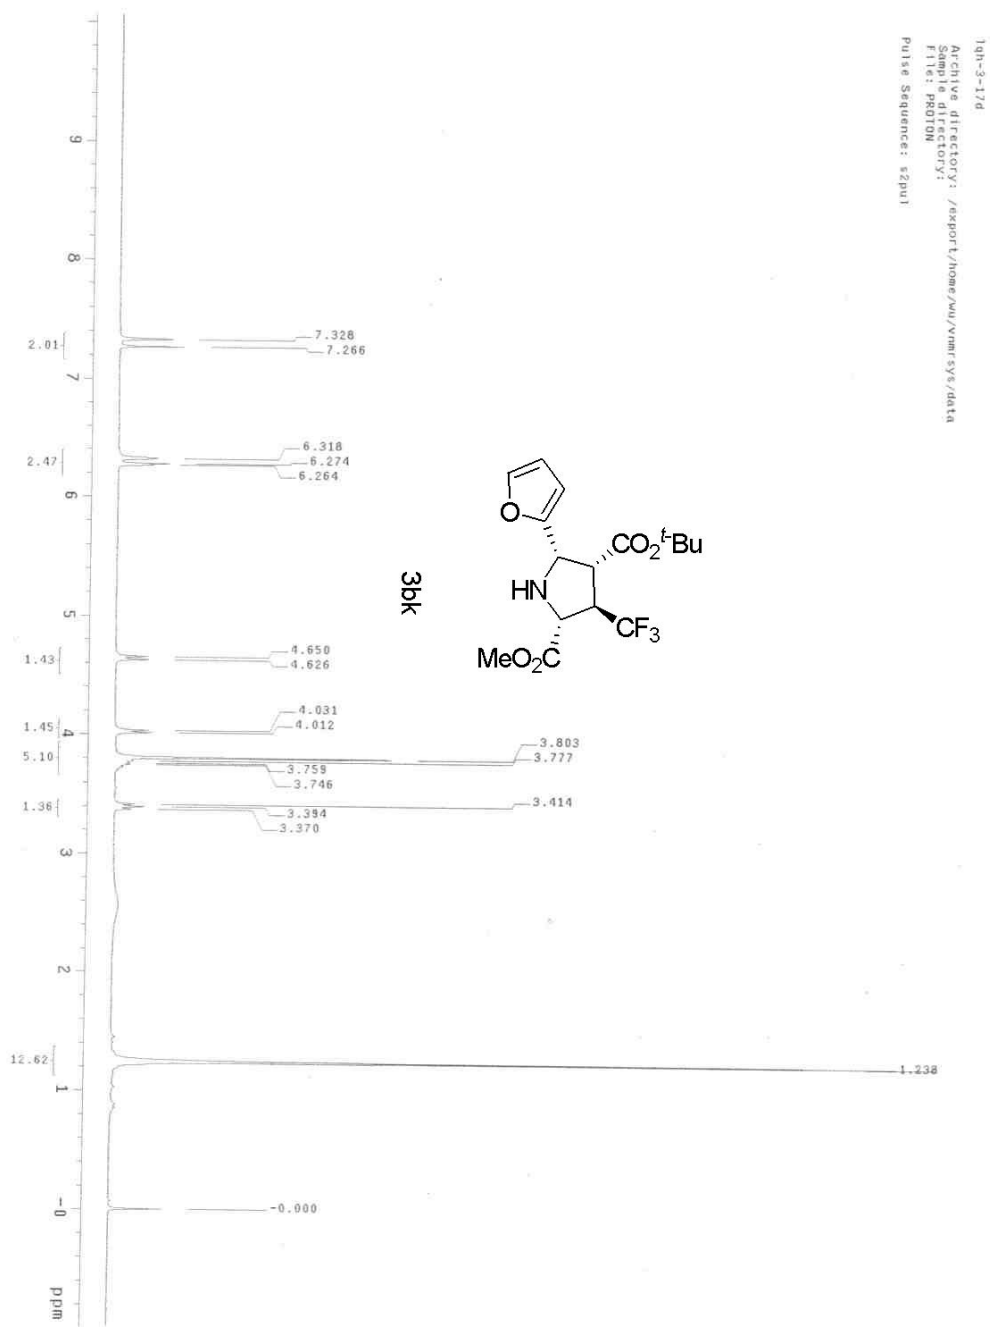

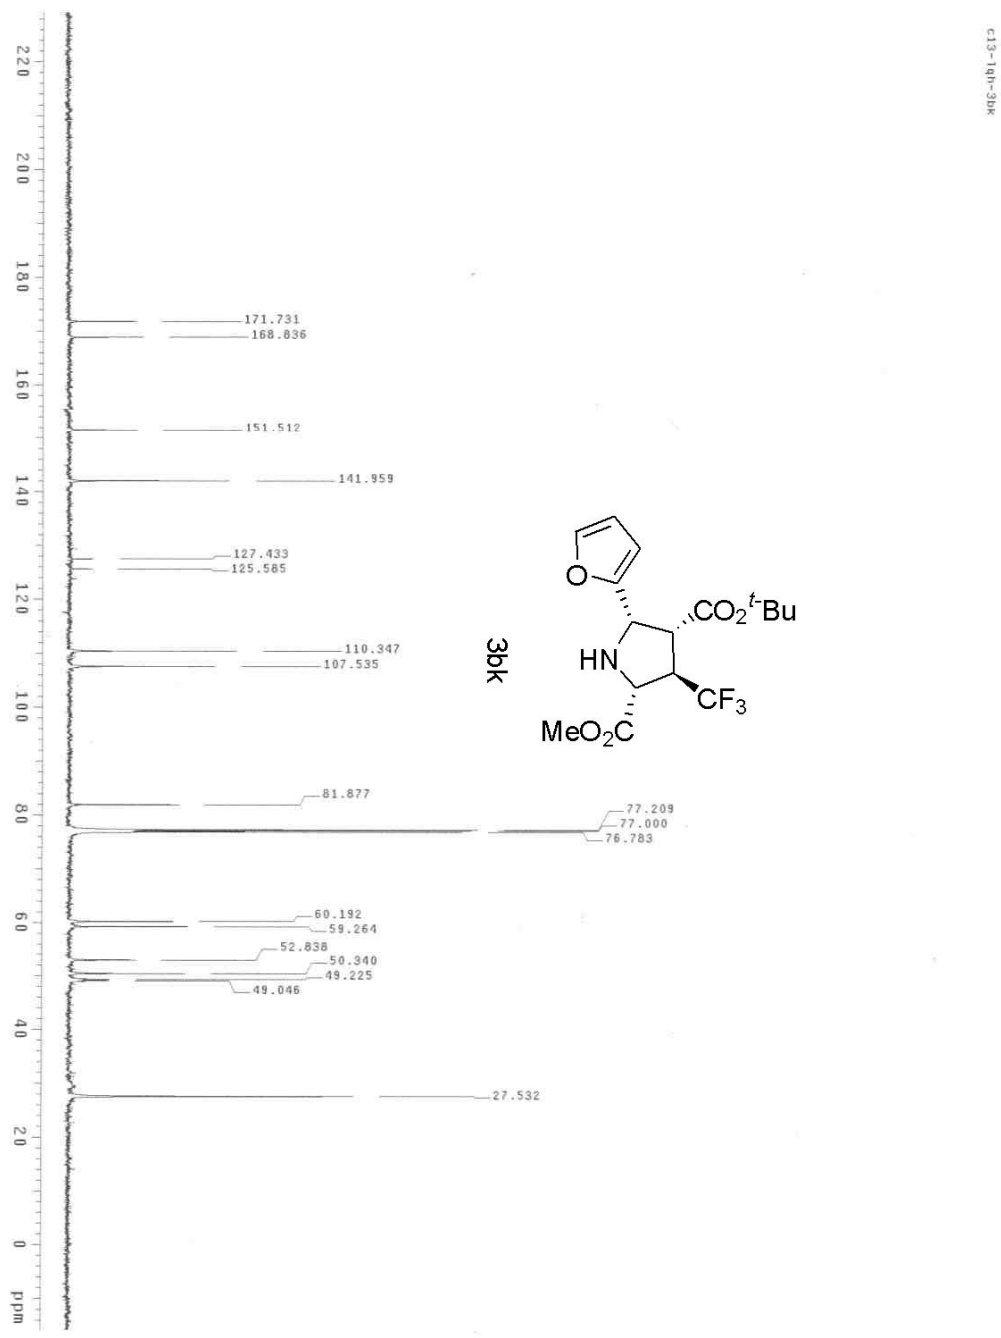

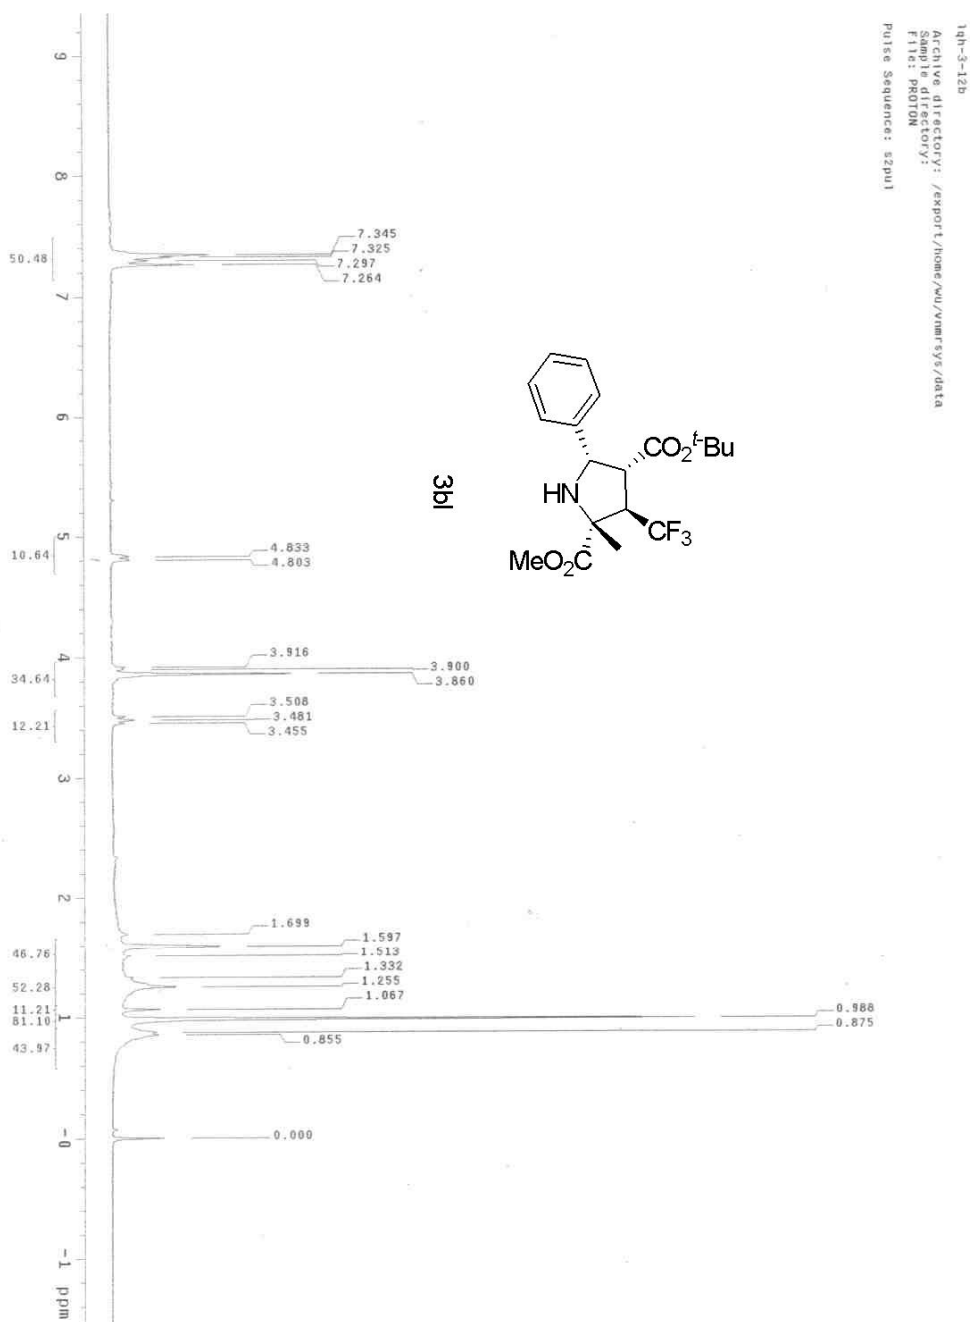

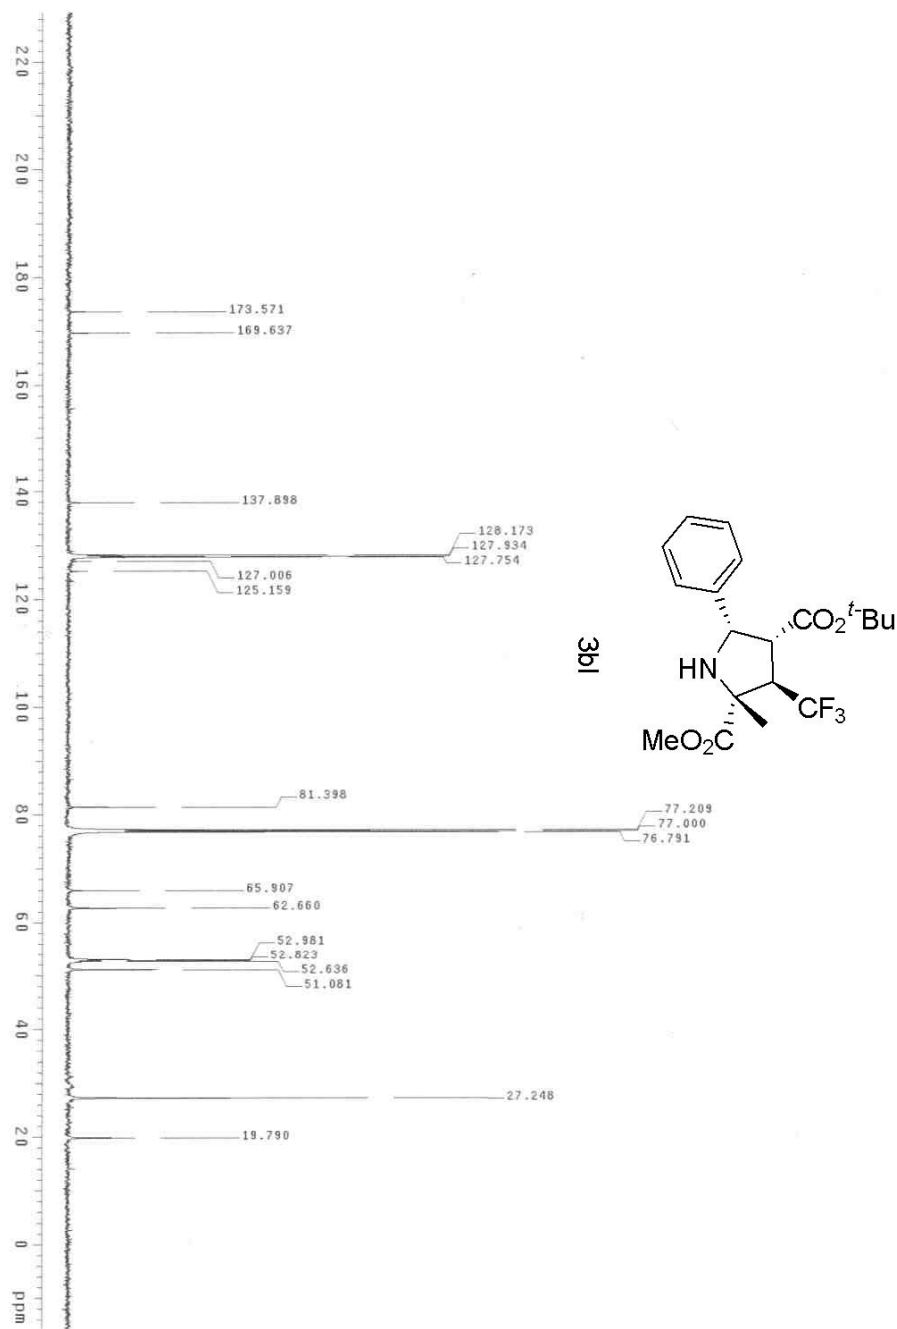



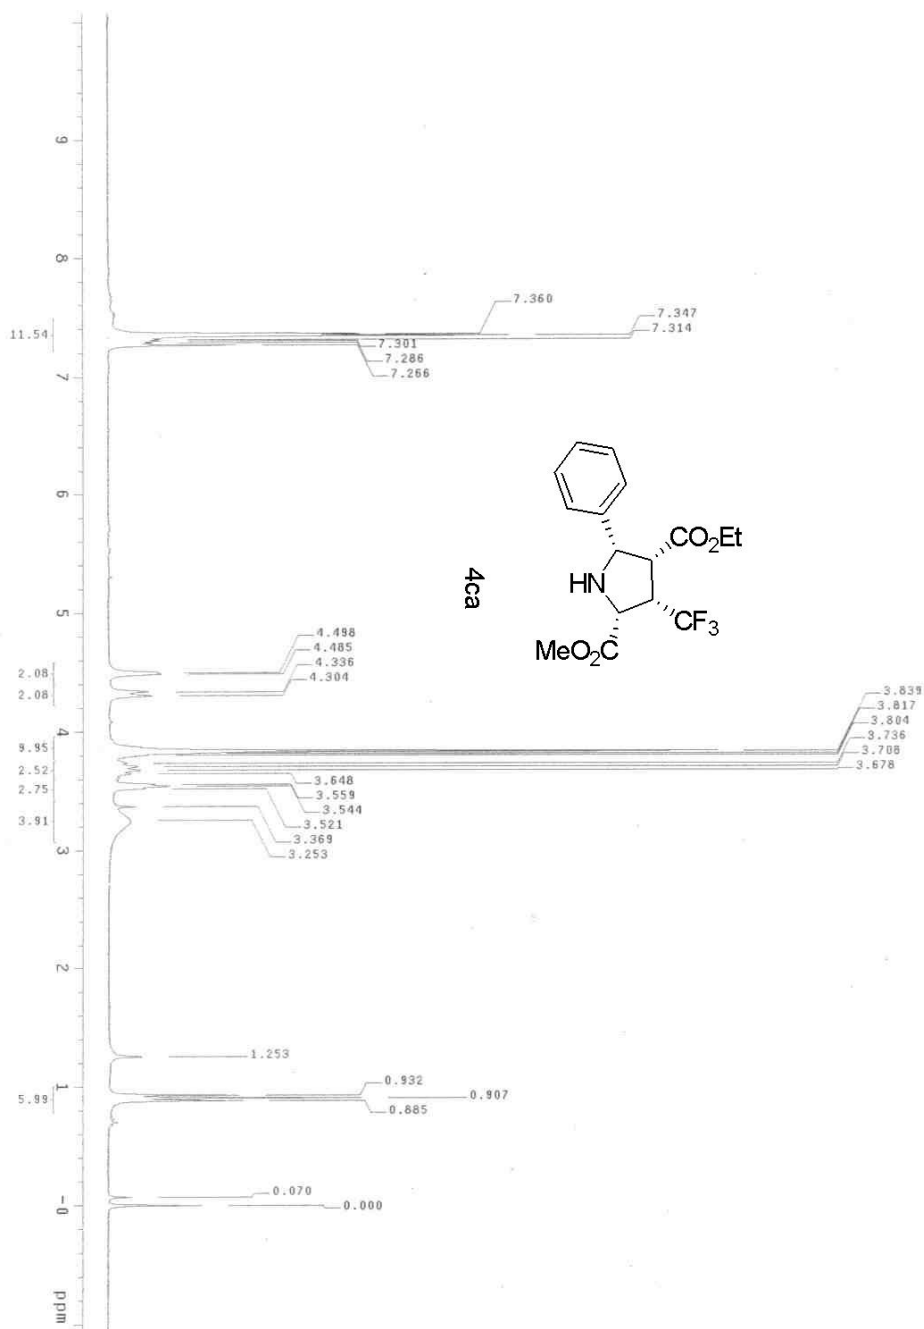

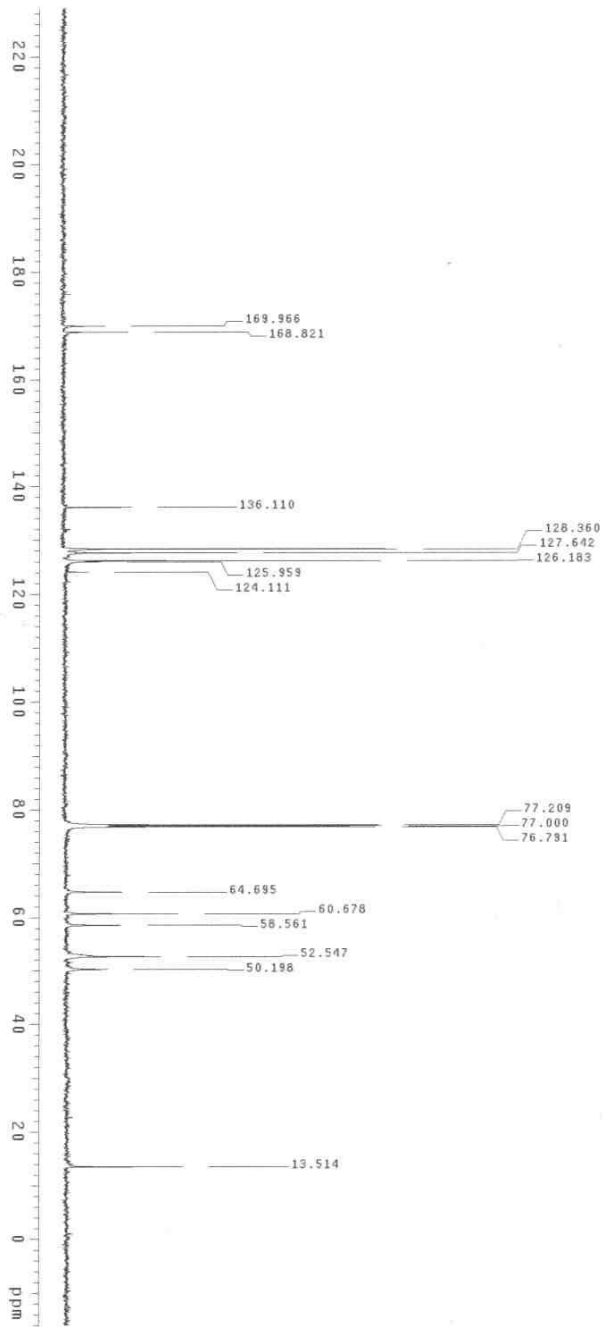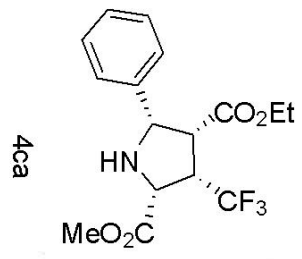

c13-1q1-4ca

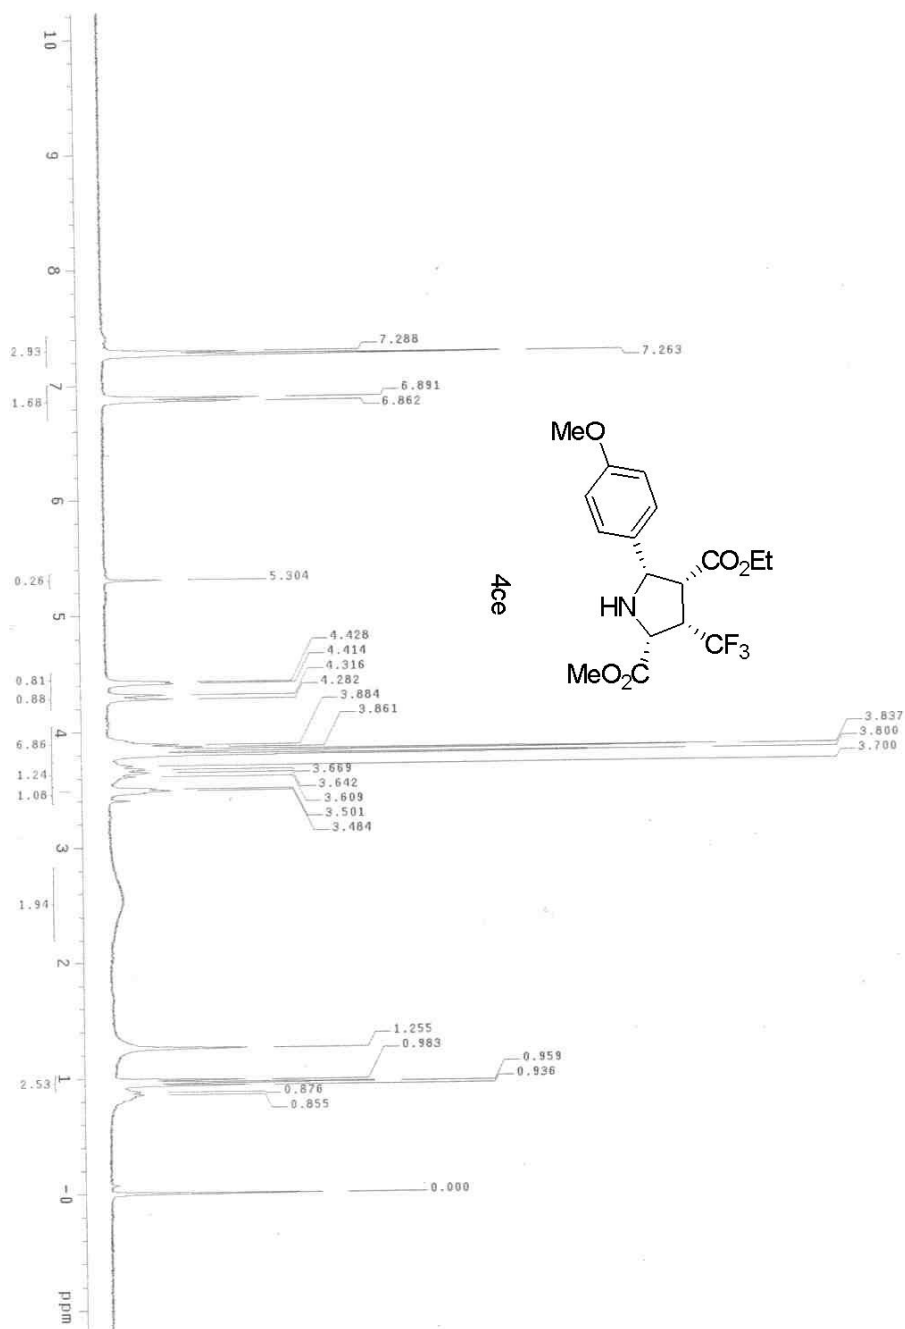

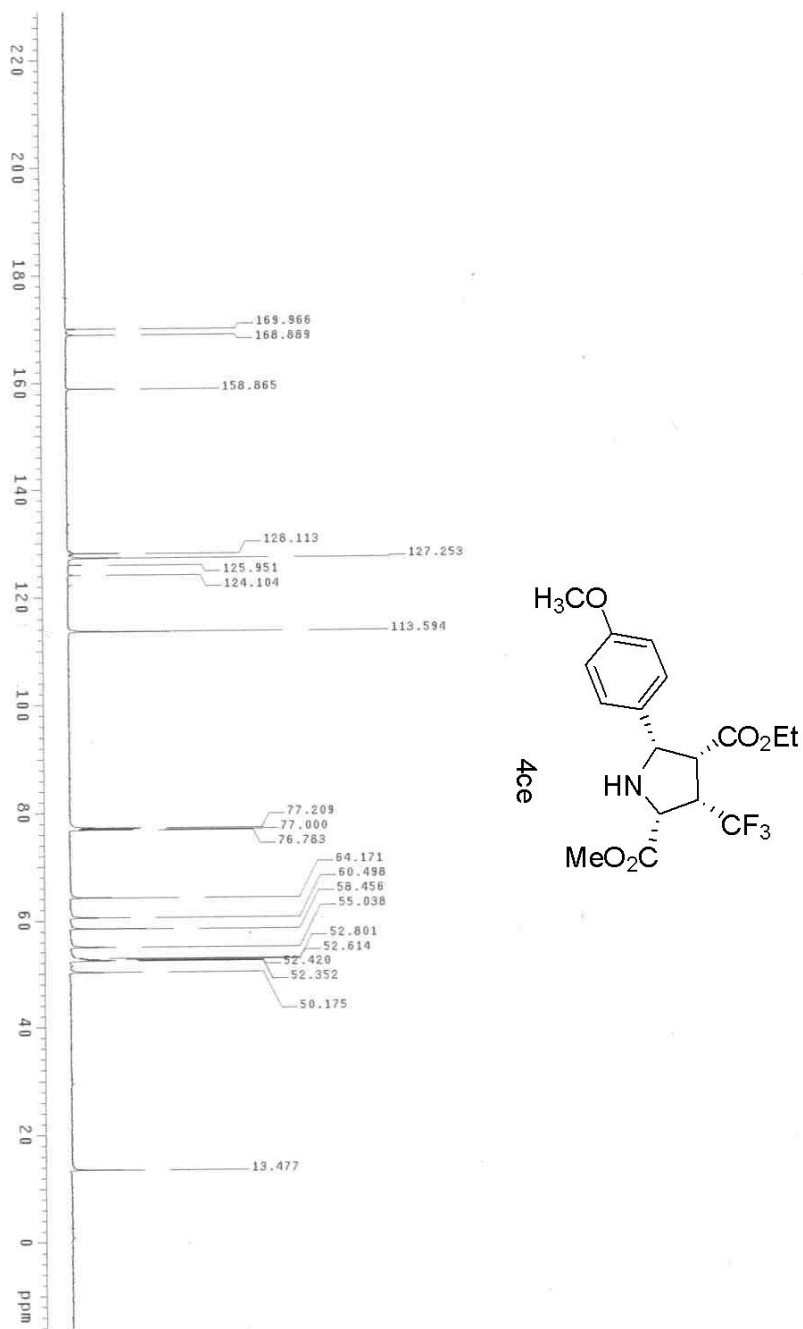

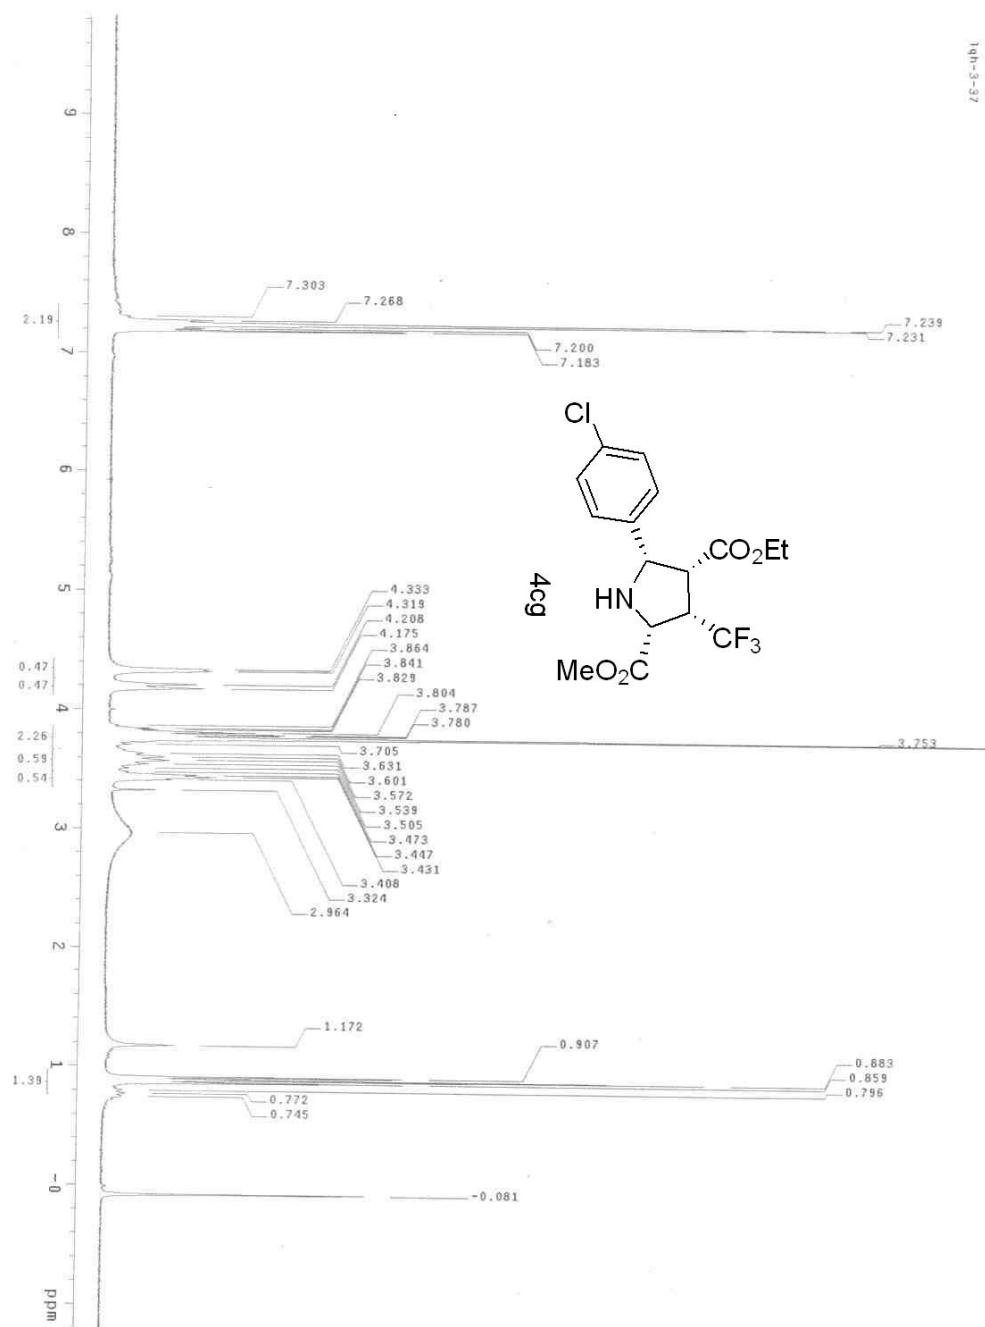

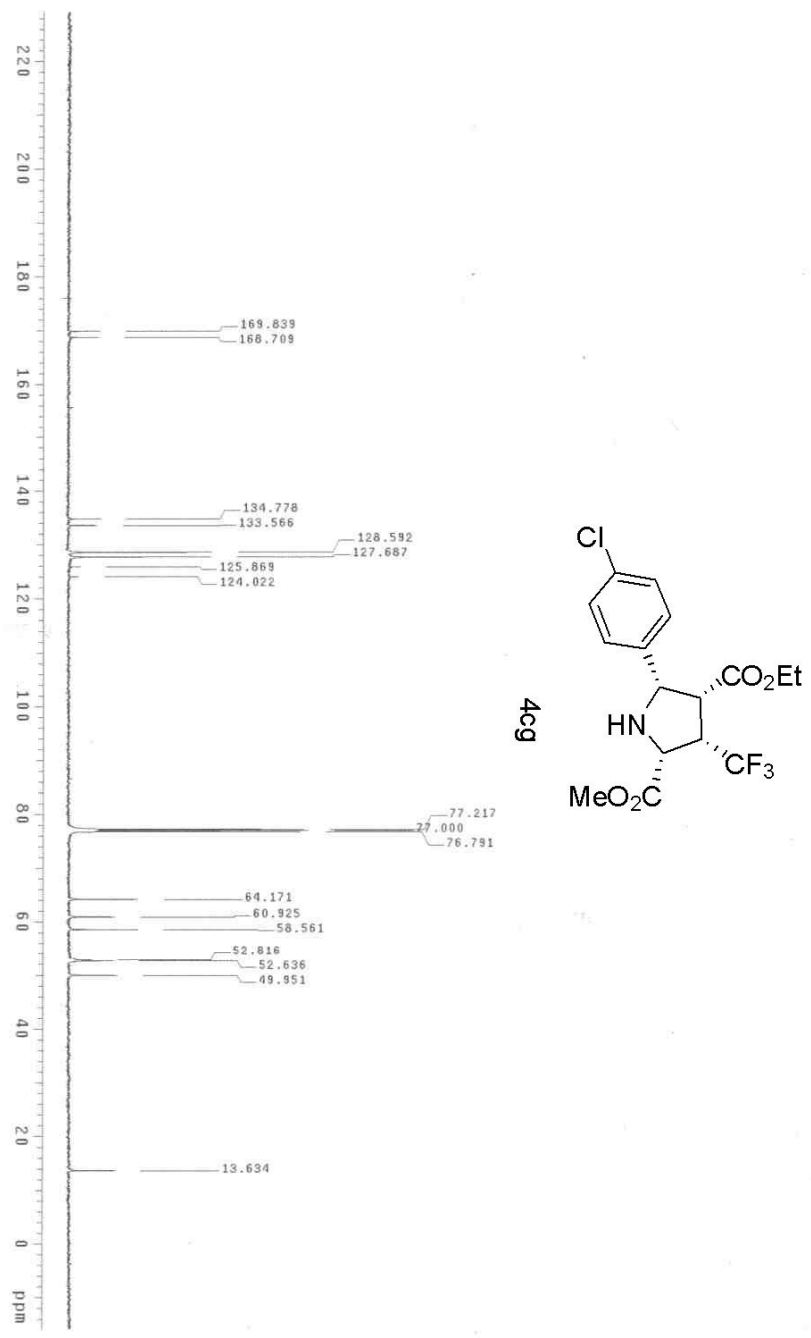

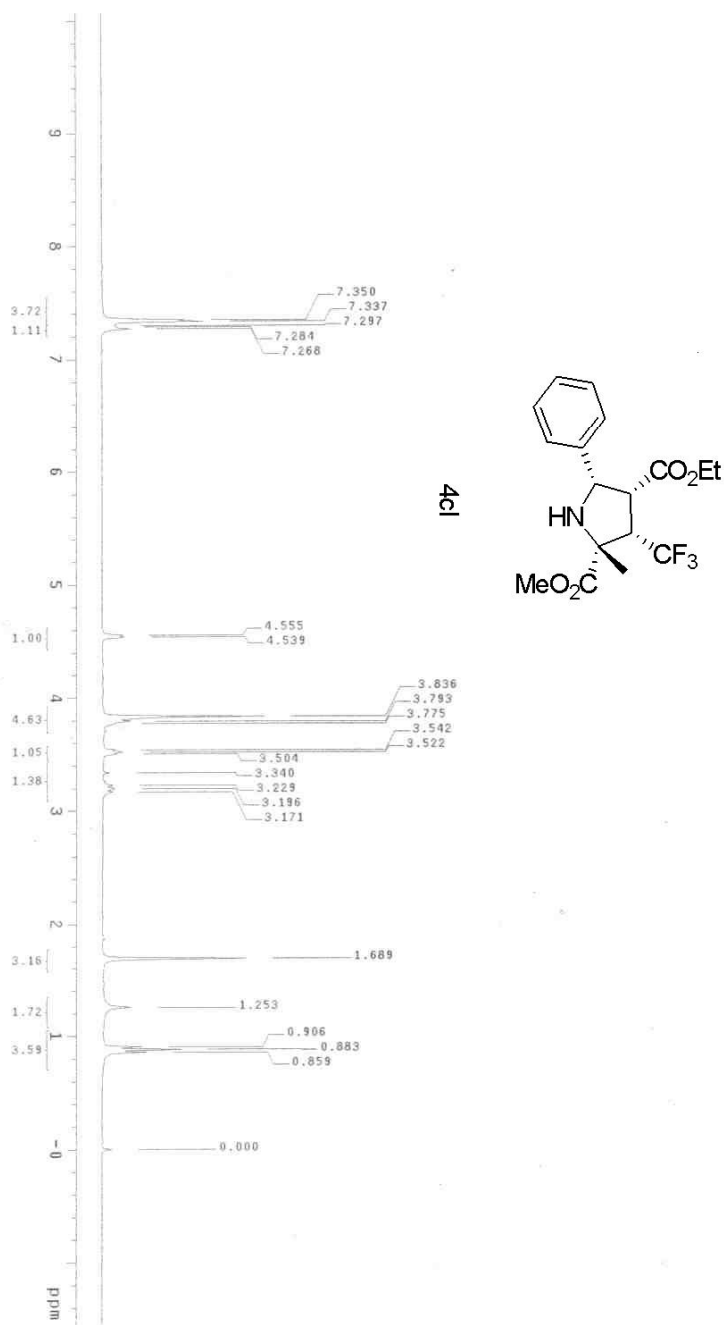

141-3-46

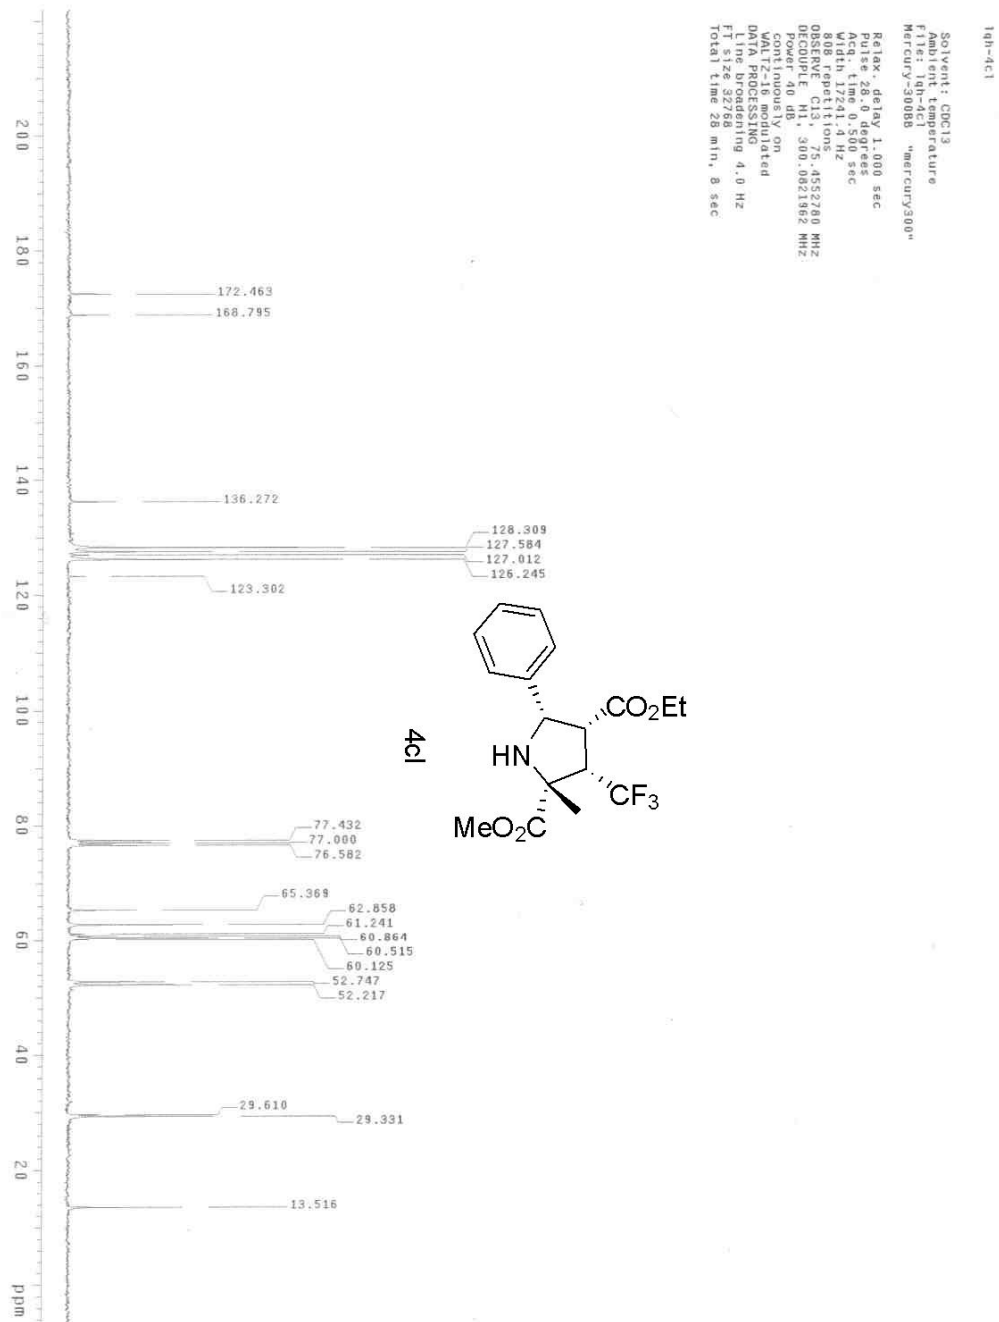



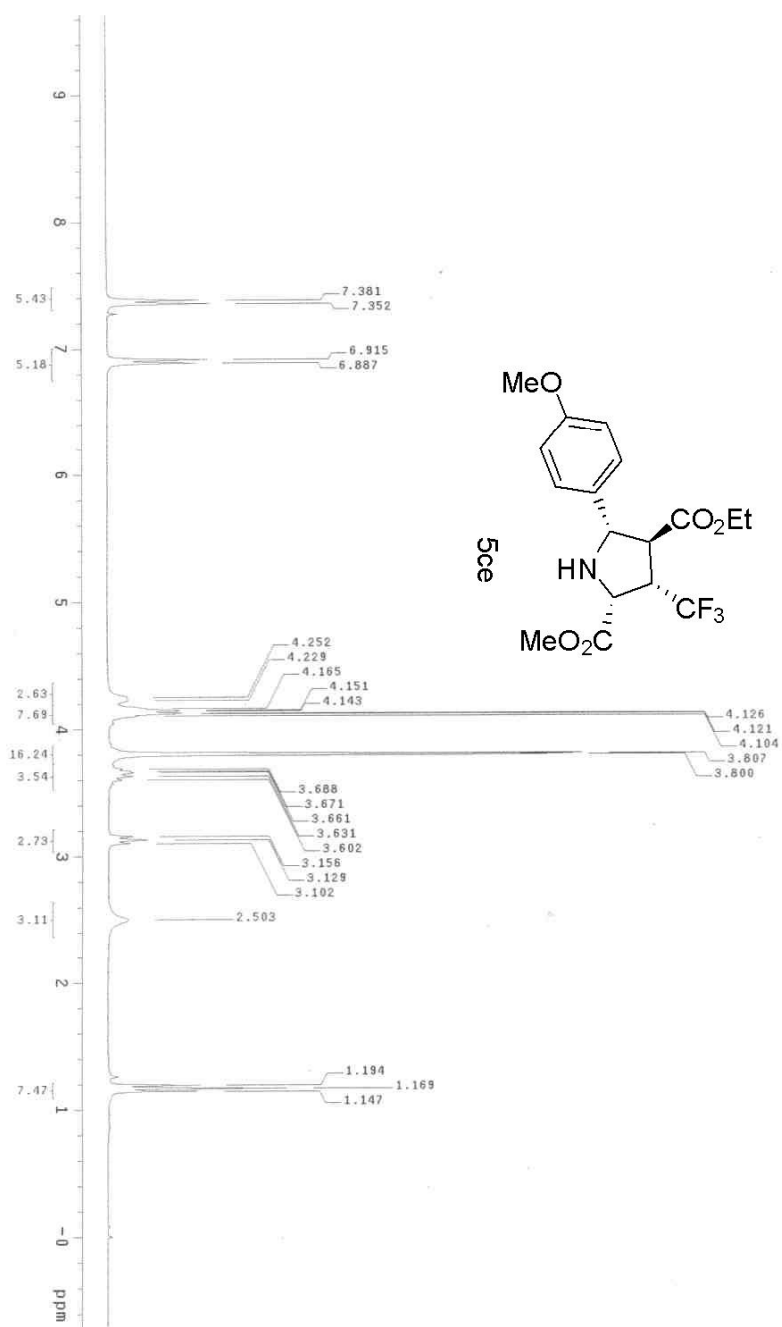

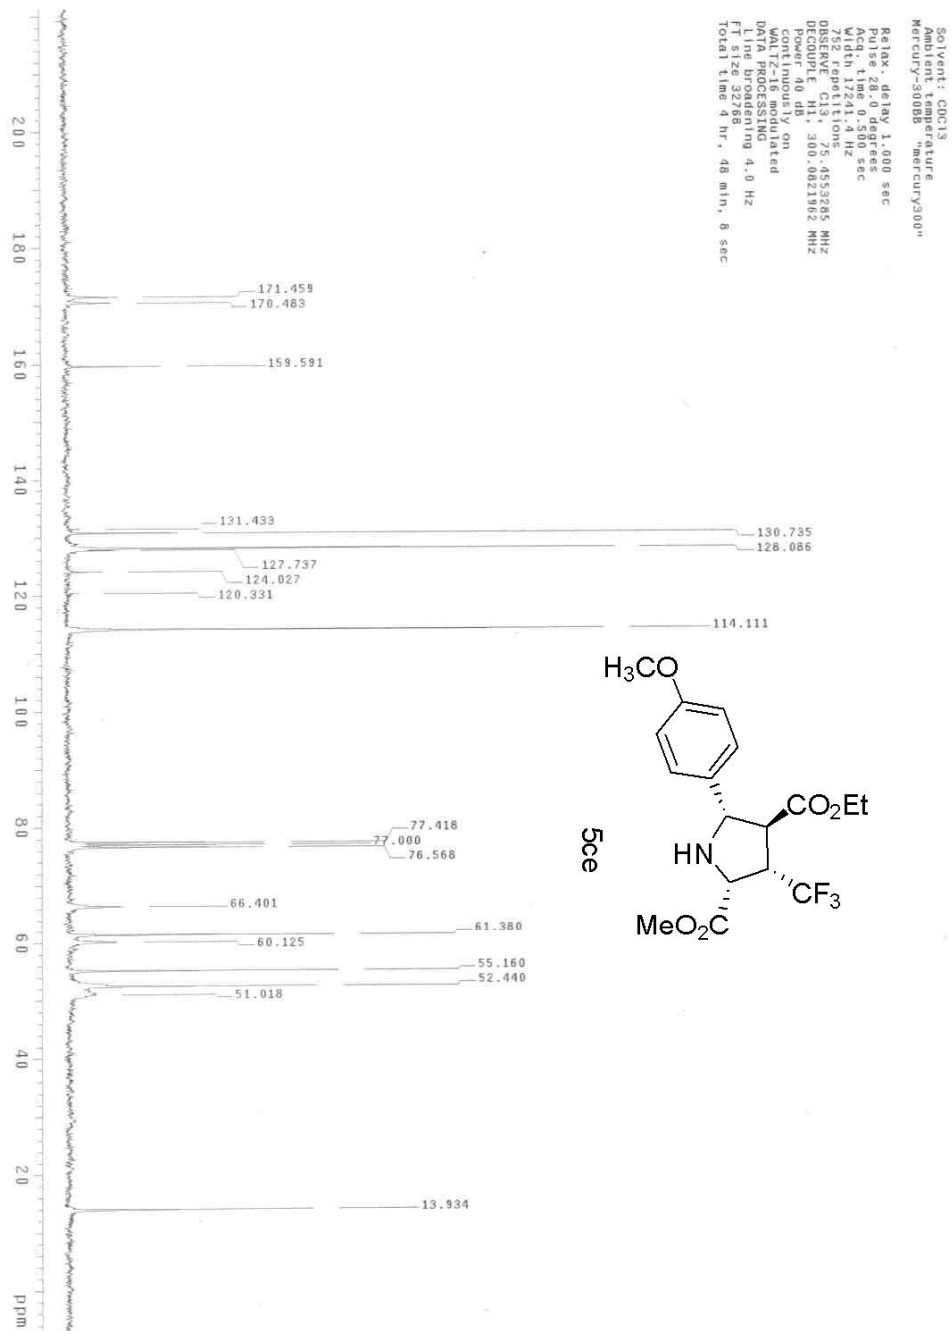

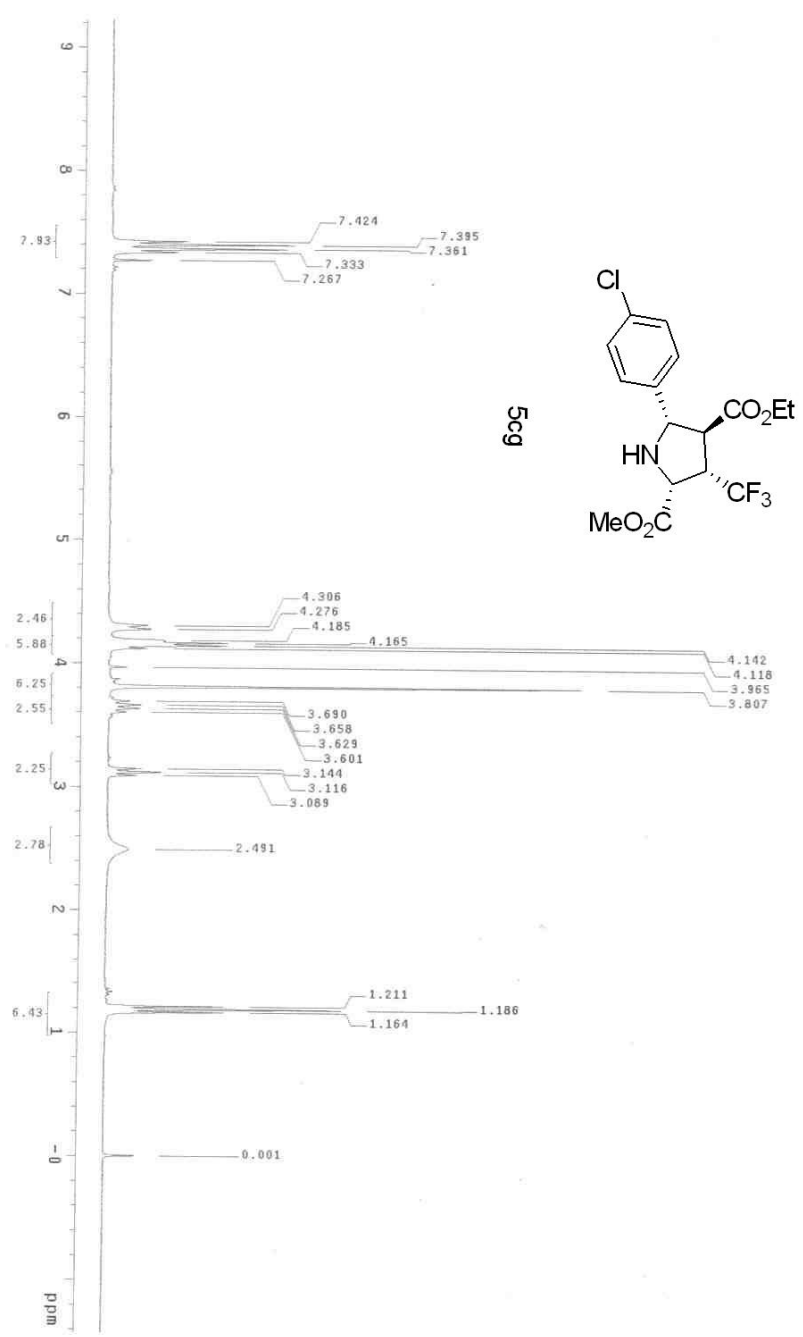

14b-110527-2

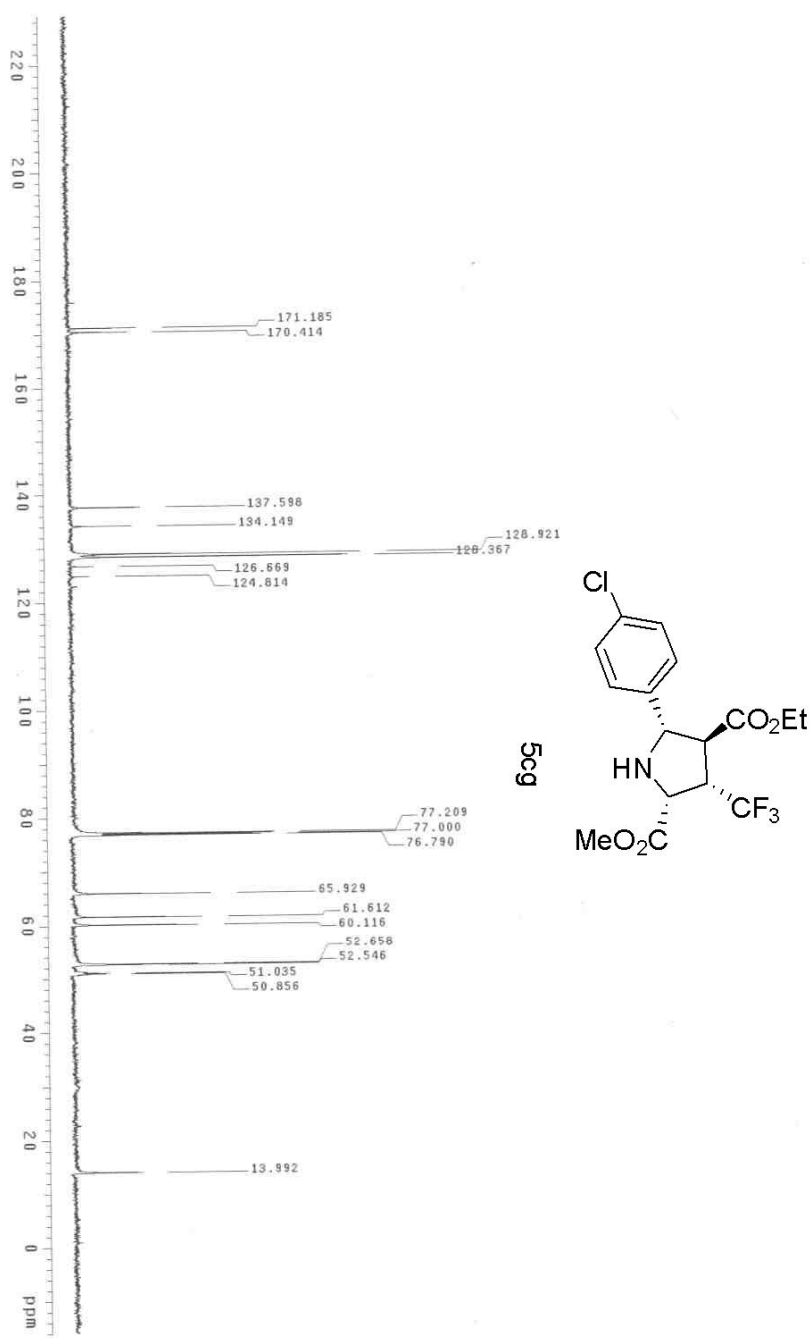

Cl3-1q1-5cg

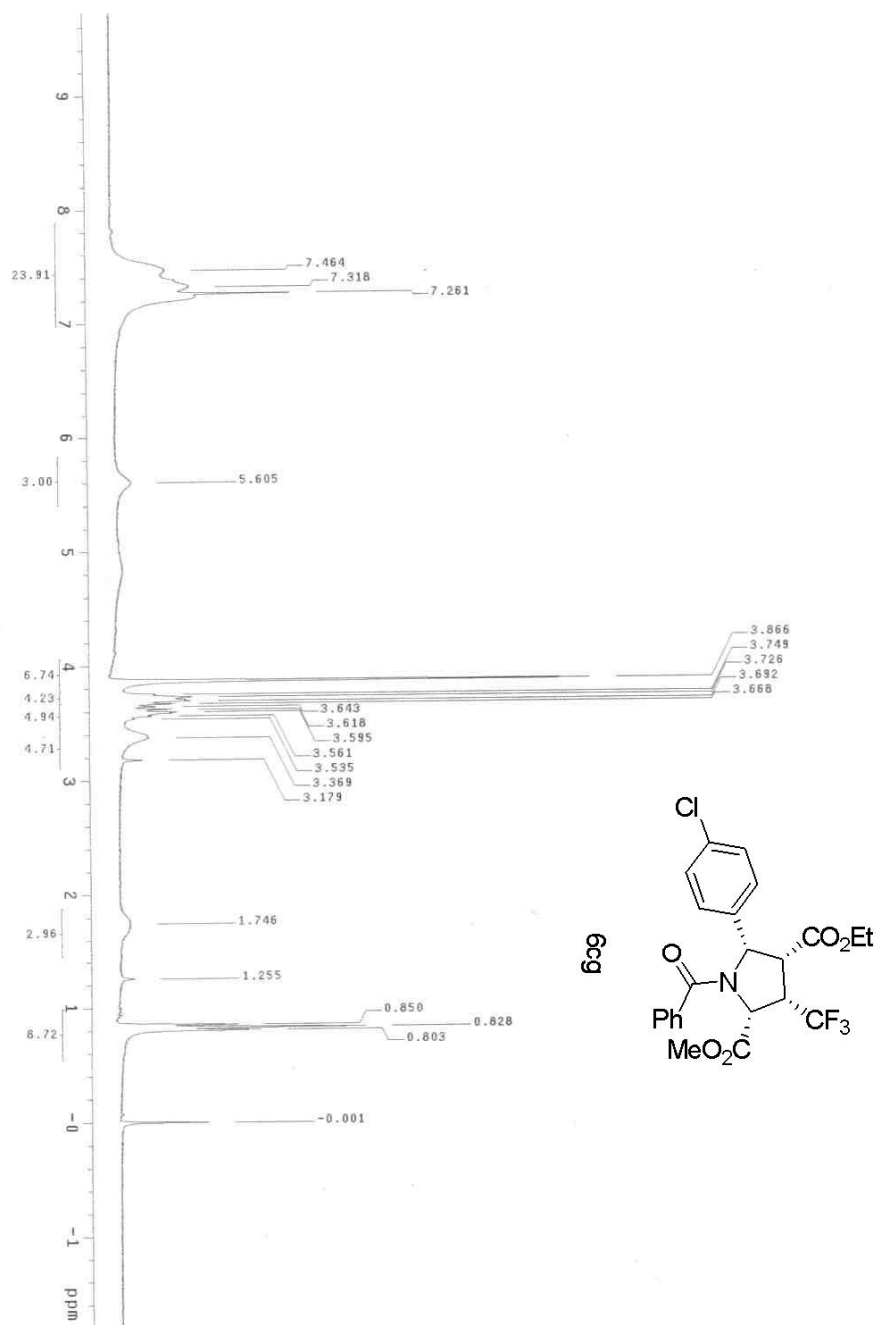

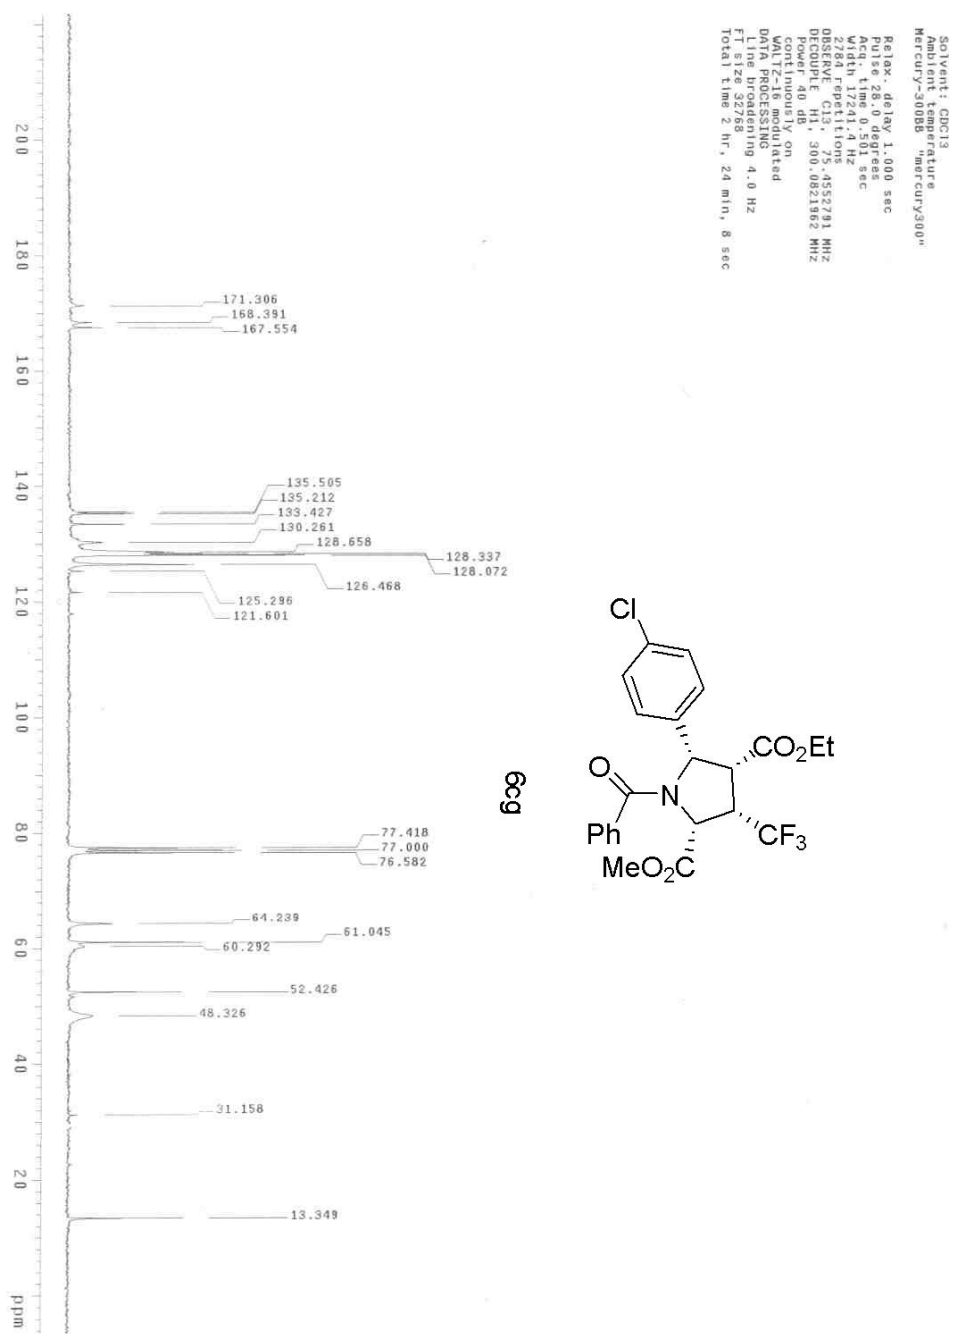

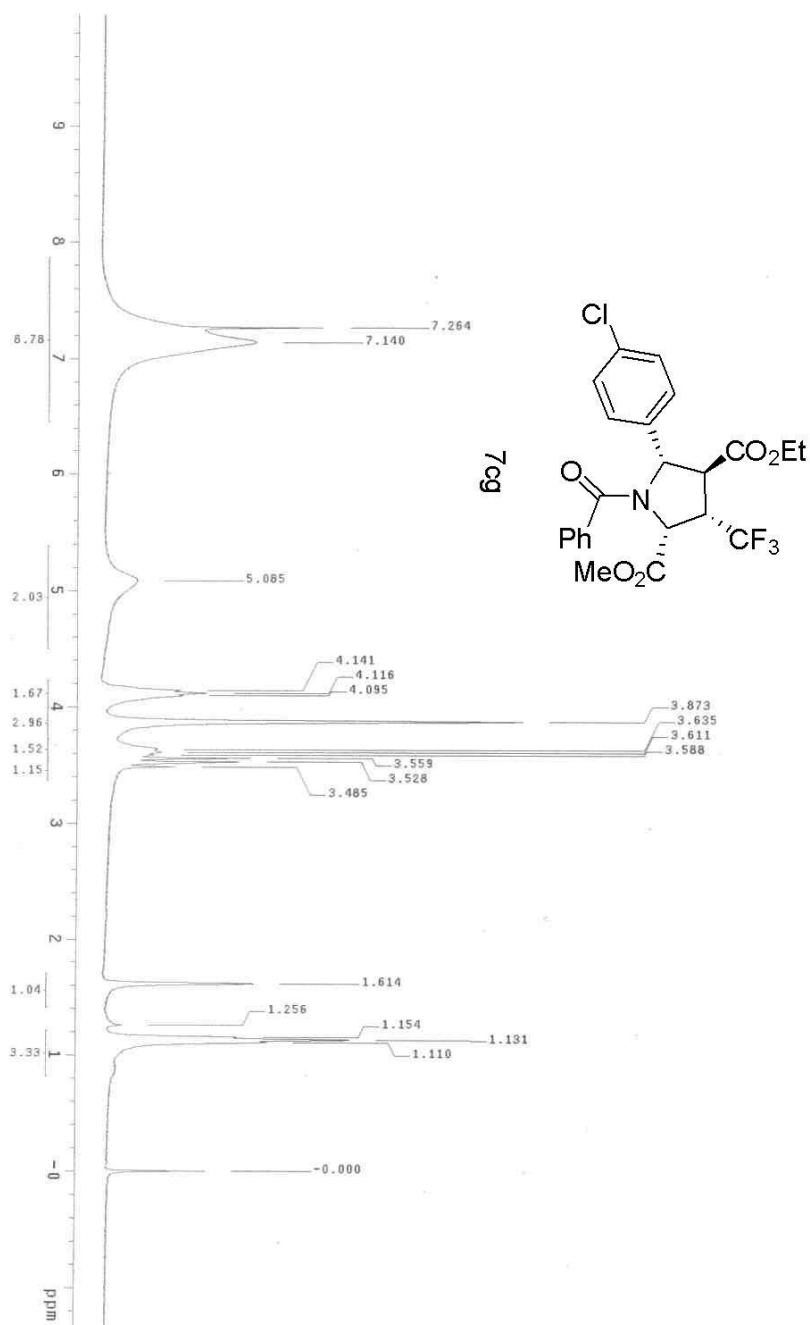

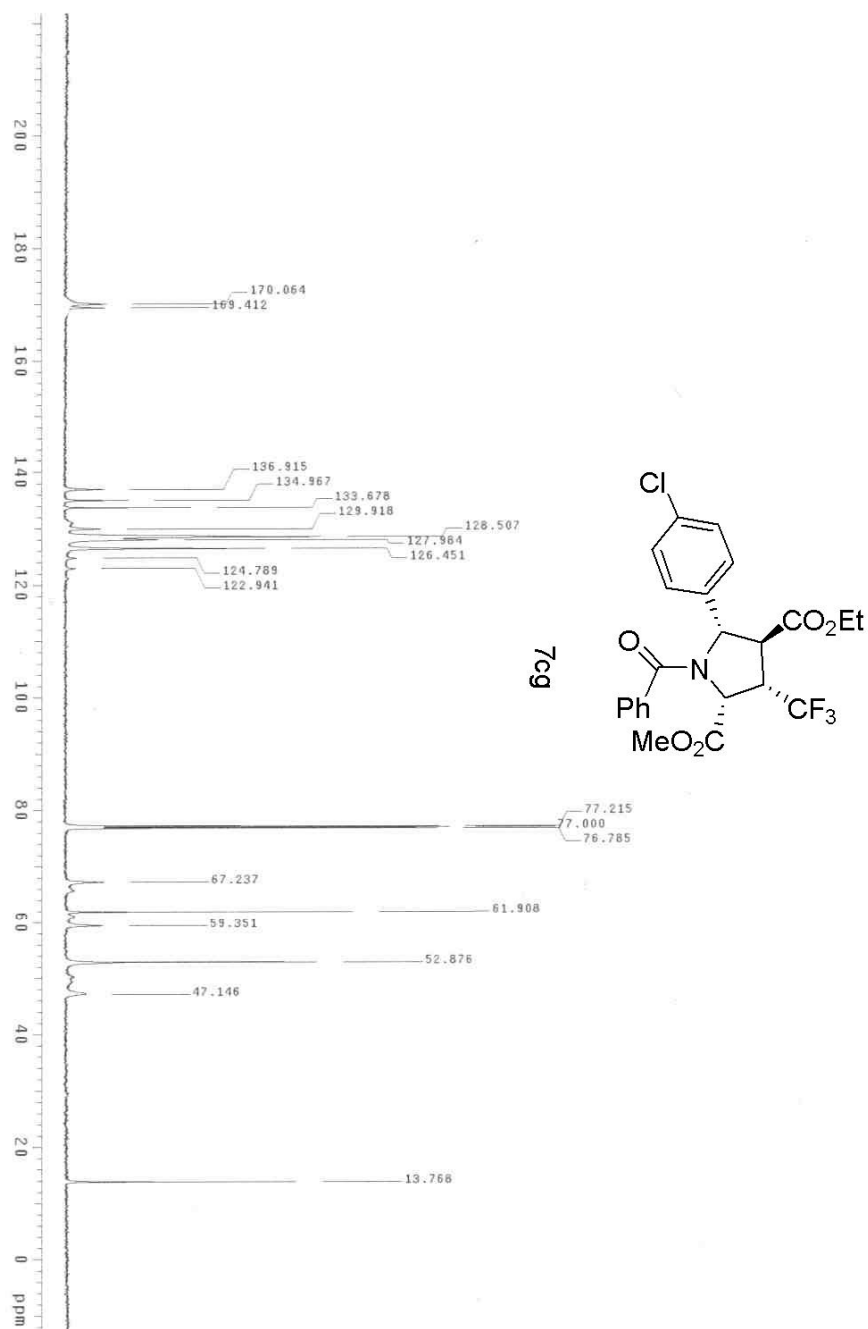



ta File D:\LC\LQH\DATE\LQH-3-1\LQH-3-3 2010-10-29 20-31-26\027-0201.D  
mple Name: LQH-3-3

=====  
Acq. Operator : DXQ  
Acq. Instrument : Instrument 1  
Injection Date : 10/29/2010 8:43:51 PM  
Seq. Line : 2  
Location : Vial 27  
Inj : 1  
Inj Volume : 5 µl  
Acq. Method : D:\LC\LQH\DATE\LQH-3-1\LQH-3-3 2010-10-29 20-31-26\ASH-2-98-10-220NM-  
20MIN.M  
Last changed : 10/26/2010 8:40:56 AM by TMC  
Analysis Method : D:\LC\LQH\DATE\LQH-3-1\LQH-3-3 2010-10-29 20-31-26\027-0201.D\DA.M (ASH-2-  
98-10-220NM-20MIN.M)  
Last changed : 5/29/2011 7:05:04 PM by LTL  
(modified after loading)

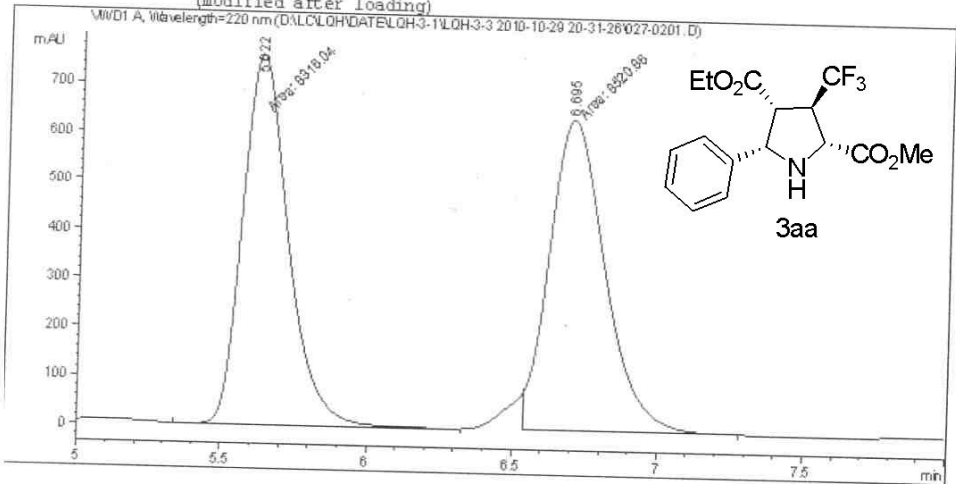

=====  
Area Percent Report  
=====

Sorted By : Signal  
Multiplier : 1.0000  
Dilution : 1.0000  
Use Multiplier & Dilution Factor with ISTDs

Signal 1: VMD1 A, Wavelength=220 nm

| Peak # | RetTime [min] | Type | Width [min] | Area mAU   | Height [mAU] | Area %  |
|--------|---------------|------|-------------|------------|--------------|---------|
| 1      | 5.622         | MM   | 0.1826      | 8316.03711 | 759.20740    | 49.3918 |
| 2      | 6.695         | FM   | 0.2228      | 8520.85645 | 637.48792    | 50.6082 |

Totals : 1.68369e4 1396.69531

=====  
\*\*\* End of Report \*\*\*  
=====

ment 1 5/29/2011 7:05:30 PM LTL

ta File D:\LC\LQH\DATE\LQH-3-1\LQH-3-3 2010-10-29 20-31-26\028-0301.D  
mple Name: LQH-2-96B

```
=====
Acq. Operator   : DXQ                               Seq. Line :    3
Acq. Instrument : Instrument 1                       Location  : Vial 28
Injection Date  : 10/29/2010 9:05:24 PM              Inj       :    1
                                                    Inj Volume: 5 µl
Acq. Method     : D:\LC\LQH\DATE\LQH-3-1\LQH-3-3 2010-10-29 20-31-26\ASH-2-98-10-22ONM-
                20MIN.M
Last changed    : 10/26/2010 8:40:56 AM by TMC
Analysis Method : D:\LC\LQH\DATE\LQH-3-1\LQH-3-3 2010-10-29 20-31-26\028-0301.D\DA.M (ASH-2-
                98-10-22ONM-20MIN.M)
Last changed    : 5/29/2011 7:07:12 PM by LTL
                (modified after loading)
=====
```

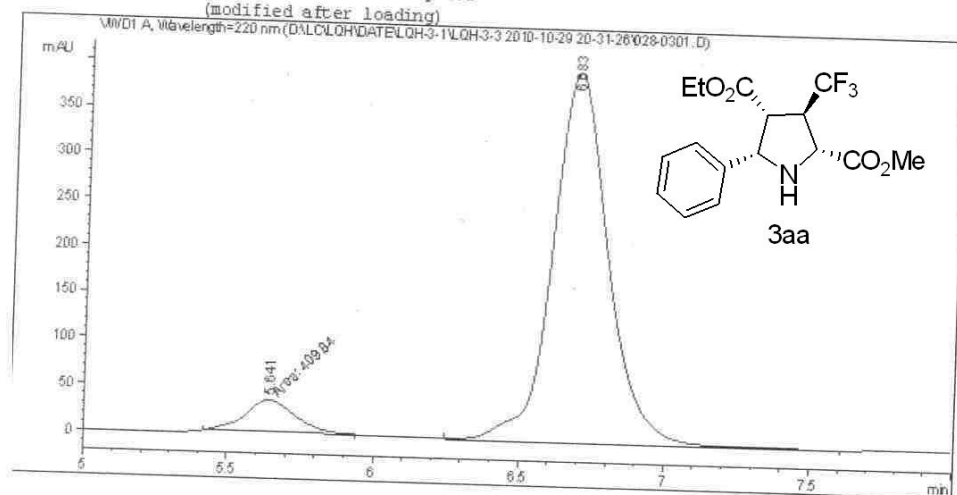

# Area Percent Report

```
=====
Sorted By      :      Signal
Multiplier     :      1.0000
Dilution       :      1.0000
Use Multiplier & Dilution Factor with ISTDs
=====
```

Signal 1: VWD1 A, Wavelength=220 nm

| Peak # | RetTime [min] | Type | Width [min] | Area mAU   | Height [mAU] | Area %  |
|--------|---------------|------|-------------|------------|--------------|---------|
| 1      | 5.641         | MM   | 0.1983      | 409.84015  | 34.45402     | 7.1710  |
| 2      | 6.683         | BB   | 0.2019      | 5305.40674 | 398.54132    | 92.8290 |

Totals : 5715.24689 432.99534

\*\*\* End of Report \*\*\*

Printed 1 5/29/2011 7:07:18 PM LTL

Page 1 of 1

File D:\LC\LQH\DATE\LQH-2-81\LQH-2-81 2010-10-12 18-58-21\092-0201.D  
Sample Name: LQH-2-81

=====

|                                                                                                               |                    |
|---------------------------------------------------------------------------------------------------------------|--------------------|
| Acq. Operator : DXQ                                                                                           | Seq. Line : 2      |
| Acq. Instrument : Instrument 1                                                                                | Location : Vial 92 |
| Injection Date : 10/12/2010 7:10:42 PM                                                                        | Inj : 1            |
|                                                                                                               | Inj Volume : 5 µl  |
| Acq. Method : D:\LC\LQH\DATE\LQH-2-81\LQH-2-81 2010-10-12 18-58-21\ASH-2-98-1ML-220NM.M                       |                    |
| Last changed : 10/12/2010 6:57:54 PM by DXQ                                                                   |                    |
| Analysis Method : D:\LC\LQH\DATE\LQH-2-81\LQH-2-81 2010-10-12 18-58-21\092-0201.D\DA.M (ASH-2-98-1ML-220NM.M) |                    |
| Last changed : 10/12/2010 7:21:20 PM by DXQ                                                                   |                    |

(modified after loading)

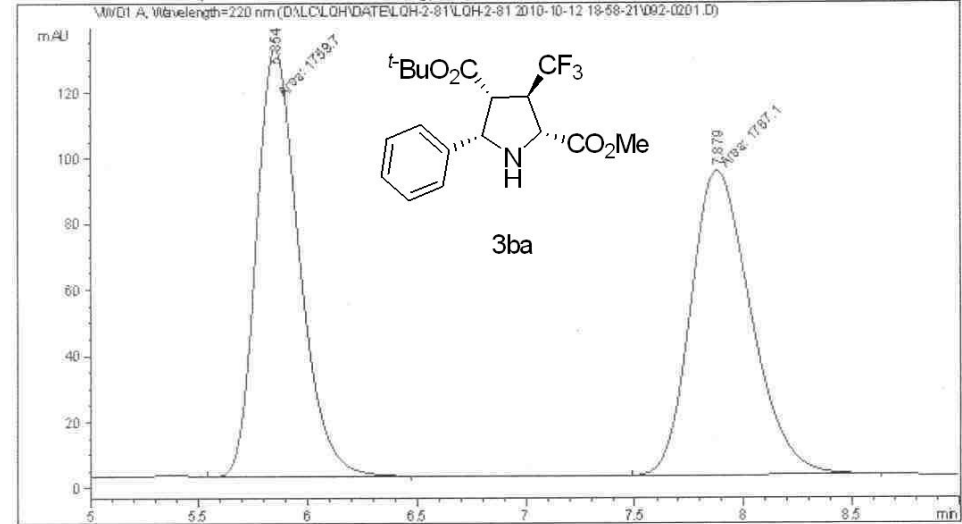

=====

Area Percent Report

Sorted By : Signal  
Multiplier : 1.0000  
Dilution : 1.0000  
Use Multiplier & Dilution Factor with ISTDs

Signal 1: WV01 A, Wavelength=220 nm

| Peak # | RetTime [min] | Type | Width [min] | Area mAU   | Height [mAU] | Area %  |
|--------|---------------|------|-------------|------------|--------------|---------|
| 1      | 5.854         | MM   | 0.2261      | 1759.69812 | 129.72574    | 49.8950 |
| 2      | 7.879         | MM   | 0.3191      | 1767.10266 | 92.28297     | 50.1050 |

Totals : 3526.80078 222.00871

=====

\*\*\* End of Report \*\*\*

Instrument 1 10/12/2010 7:21:24 PM DXQ

Page 1 of 1

a File D:\LC\LQH\DATE\LQH-2-81\LQH-2-85 2010-10-14 10-50-06\094-0201.D  
File Name: lqh-2-85

```
=====
Acq. Operator   : tmc                      Seq. Line :    2
Acq. Instrument : Instrument 1              Location  : Vial 94
Injection Date  : 10/14/2010 11:02:25 AM    Inj       :    1
                                           Inj Volume: 5 µl
Acq. Method     : D:\LC\LQH\DATE\LQH-2-81\LQH-2-85 2010-10-14 10-50-06\ASH-2-98-1ML-220NM-
                                           10MIN.M
Last changed    : 9/29/2010 2:44:36 PM by DXQ
Analysis Method : D:\LC\LQH\DATE\LQH-2-81\LQH-2-85 2010-10-14 10-50-06\094-0201.D\DA.M (ASH-
                                           2-98-1ML-220NM-10MIN.M)
Last changed    : 1/20/2011 8:14:41 PM by THL-7-95-97
                                           (modified after loading)
=====
```

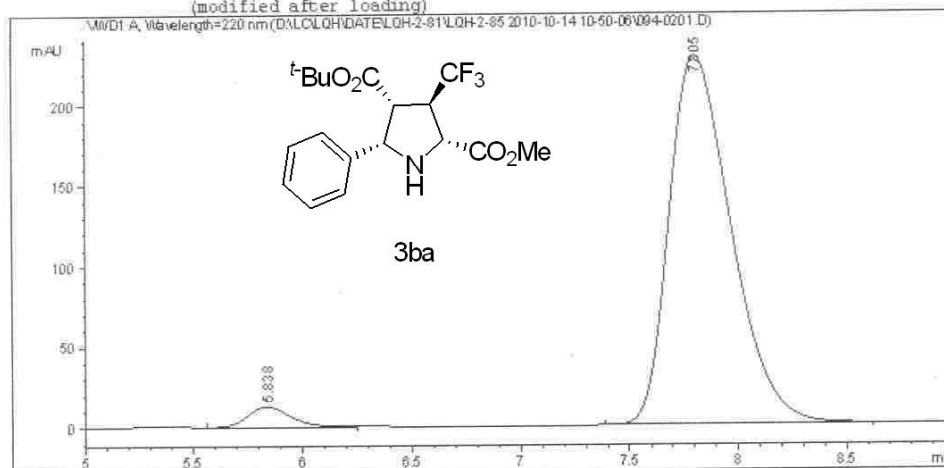

# Area Percent Report

```
Sorted By      : Signal
Multiplier     : 1.0000
Dilution       : 1.0000
Use Multiplier & Dilution Factor with ISTDs
```

Signal 1: VMD1 A, Wavelength=220 nm

| Peak # | RetTime [min] | Type | Width [min] | Area mAU   | Height [mAU] | Area %  |
|--------|---------------|------|-------------|------------|--------------|---------|
| 1      | 5.838         | VB   | 0.2094      | 174.49124  | 12.72870     | 3.7309  |
| 2      | 7.805         | BB   | 0.3067      | 4502.38525 | 228.79823    | 96.2691 |

Totals : 4676.87650 241.52693

\*\*\* End of Report \*\*\*

Instrument 1 1/20/2011 8:14:47 PM THL-7-95-97

Page 1 of 1

File D:\LC\LOH\DATE\LOH-3-1\LOH-3-1-5 2010-10-29 18-45-16\025-0401.D  
Sample Name: LOH-3-4

```
=====
Acq. Operator   : DXQ                      Seq. Line :    4
Acq. Instrument : Instrument 1              Location  : Vial 25
Injection Date  : 10/29/2010 7:29:45 PM    Inj       :    1
                                           Inj Volume: 5 µl
Acq. Method     : D:\LC\LOH\DATE\LOH-3-1\LOH-3-1-5 2010-10-29 18-45-16\ASH-2-98-1ML-220NM.M
Last changed    : 10/29/2010 7:39:19 PM by DXQ
                  (modified after loading)
Analysis Method : D:\LC\LOH\DATE\LOH-3-1\LOH-3-1-5 2010-10-29 18-45-16\025-0401.D\DA.M (ASH-
                  2-98-1ML-220NM.M)
Last changed    : 11/2/2010 6:39:25 PM by dxq
                  (modified after loading)
=====
```

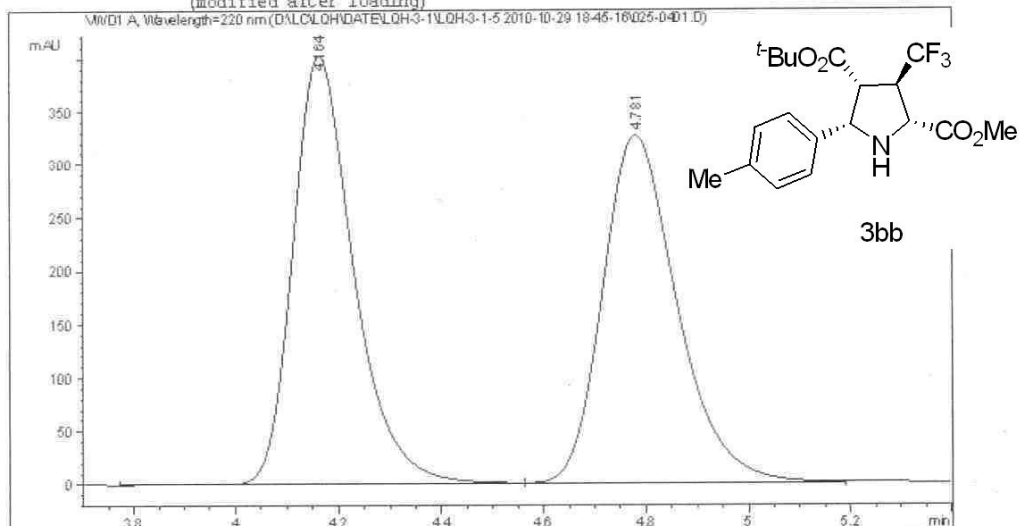

# Area Percent Report

```
Sorted By      : Signal
Multiplier     : 1.0000
Dilution       : 1.0000
Use Multiplier & Dilution Factor with ISTDs
```

Signal 1: VWD1 A, Wavelength=220 nm

| Peak # | RetTime [min] | Type | Width [min] | Area mAU *s | Height [mAU] | Area %  |
|--------|---------------|------|-------------|-------------|--------------|---------|
| 1      | 4.164         | VV   | 0.1249      | 3304.16870  | 402.28793    | 49.9972 |
| 2      | 4.781         | VV   | 0.1544      | 3304.54370  | 326.61957    | 50.0028 |

Totals : 6608.71240 728.90750

Instrument 1 11/2/2010 6:39:28 PM dxq

Page 1 of 1



a File D:\LC\LQH\DATE\LQH-3-10(16)\LQH-3-10(16) 2011-05-29 11-11-19\083-0401.D  
File Name: LQH-3-10B

```
=====
Acq. Operator   : LTL                               Seq. Line :    4
Acq. Instrument : Instrument 1                       Location  : Vial 83
Injection Date  : 5/29/2011 11:56:32 AM              Inj       :    1
                                                    Inj Volume: 5 µl
Acq. Method     : D:\LC\LQH\DATE\LQH-3-10(16)\LQH-3-10(16) 2011-05-29 11-11-19\ASH-2-98-1ML-
                  220NM-15MIN.M
Last changed    : 5/27/2011 12:01:57 PM by THL
Analysis Method : D:\LC\LQH\DATE\LQH-3-10(16)\LQH-3-10(16) 2011-05-29 11-11-19\083-0401.D\
                  DA.M (ASH-2-98-1ML-220NM-15MIN.M)
Last changed    : 5/29/2011 3:17:30 PM by LTL
                  (modified after loading)
=====
```

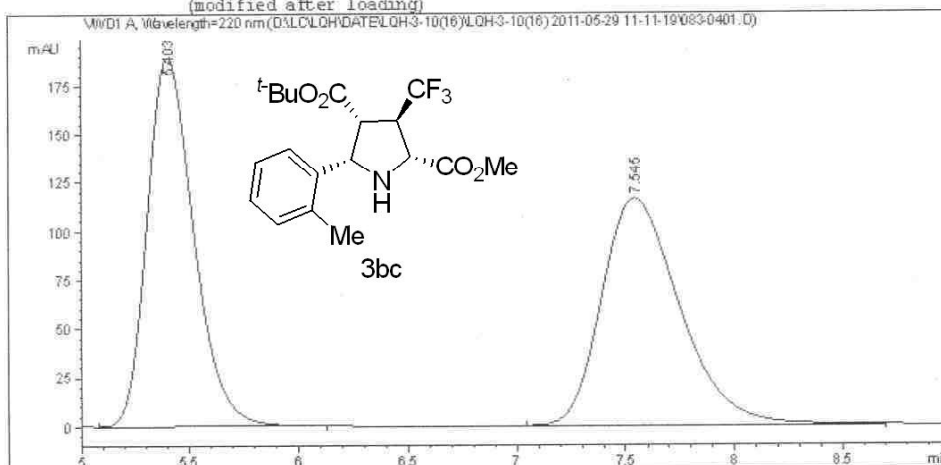

Area Percent Report

```
Sorted By      : Signal
Multiplier     : 1.0000
Dilution       : 1.0000
Use Multiplier & Dilution Factor with ISTDs
```

Signal 1: WVD1 A, Wavelength=220 nm

| Peak # | RetTime [min] | Type | Width [min] | Area mAU   | Height [mAU] | Area %  |
|--------|---------------|------|-------------|------------|--------------|---------|
| 1      | 5.403         | BB   | 0.2324      | 2852.84888 | 189.49812    | 49.8339 |
| 2      | 7.545         | BB   | 0.3820      | 2871.87134 | 115.99537    | 50.1661 |

Totals : 5724.72021 305.49349

\*\*\* End of Report \*\*\*



a File D:\LC\LQH\DATE\LQH-3-10(16)\LQH-3-10(16) 2011-05-29 11-11-19\084-0501.D  
File Name: LQH-3-16B

```
=====
Acq. Operator   : LTL                               Seq. Line :    5
Acq. Instrument : Instrument 1                       Location  : Vial 84
Injection Date  : 5/29/2011 12:12:59 PM              Inj       :    1
                                                    Inj Volume: 5 µl
Acq. Method     : D:\LC\LQH\DATE\LQH-3-10(16)\LQH-3-10(16) 2011-05-29 11-11-19\ASH-2-98-1ML-
                  220NM-15MIN.M
Last changed    : 5/27/2011 12:01:57 PM by THL
Analysis Method : D:\LC\LQH\DATE\LQH-3-10(16)\LQH-3-10(16) 2011-05-29 11-11-19\084-0501.D\
                  DA.M (ASH-2-98-1ML-220NM-15MIN.M)
Last changed    : 5/29/2011 3:21:07 PM by LTL
                  (modified after loading)
=====
```

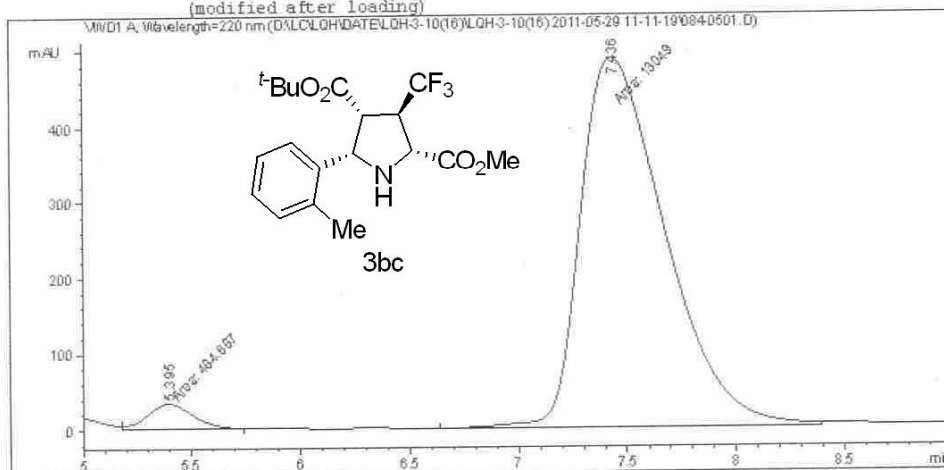

# Area Percent Report

```
Sorted By      : Signal
Multiplier     : 1.0000
Dilution       : 1.0000
Use Multiplier & Dilution Factor with ISTDs
```

Signal 1: VWD1 A, Wavelength=220 nm

| Peak # | RetTime [min] | Type | Width [min] | Area mAU  | Height [mAU] | Area %  |
|--------|---------------|------|-------------|-----------|--------------|---------|
| 1      | 5.395         | MM   | 0.2463      | 484.68695 | 32.79442     | 3.5813  |
| 2      | 7.436         | MM   | 0.4449      | 1.30490e4 | 488.84824    | 96.4187 |

Totals : 1.35337e4 521.64265

\*\*\* End of Report \*\*\*

strument 1 5/29/2011 3:21:12 PM LTL

Page 1 of 1



File D:\LC\LQH\DATE\LQH-3-10(16)\LQH-3-10(16) 2011-05-29 11-11-19\087-0801.D  
Sample Name: LQH-3-10D

```
=====
Acq. Operator   : LTL                               Seq. Line :    8
Acq. Instrument : Instrument 1                       Location  : Vial 87
Injection Date  : 5/29/2011 1:02:41 PM              Inj       :    1
                                                    Inj Volume: 5 µl
Acq. Method     : D:\LC\LQH\DATE\LQH-3-10(16)\LQH-3-10(16) 2011-05-29 11-11-19\ASH-2-98-IML-
                220NM-15MIN.M
Last changed    : 5/27/2011 12:01:57 PM by THL
Analysis Method : D:\LC\LQH\DATE\LQH-3-10(16)\LQH-3-10(16) 2011-05-29 11-11-19\087-0801.D\
                DA.M (ASH-2-98-IML-220NM-15MIN.M)
Last changed    : 5/29/2011 3:25:47 PM by LTL
                (modified after loading)
=====
```

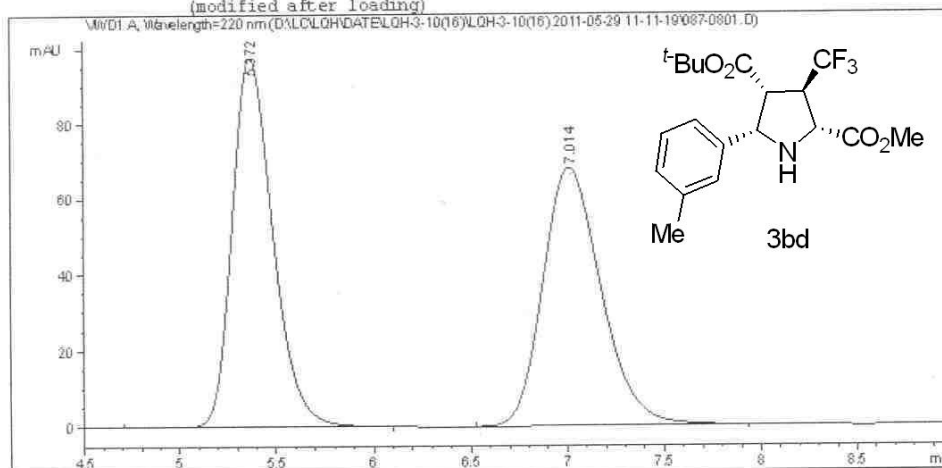

# Area Percent Report

```
Sorted By      : Signal
Multiplier     : 1.0000
Dilution       : 1.0000
Use Multiplier & Dilution Factor with ISTDs
```

Signal 1: VMD1 A, Wavelength=220 nm

| Peak # | RetTime [min] | Type | Width [min] | Area mAU *s | Height [mAU] | Area %  |
|--------|---------------|------|-------------|-------------|--------------|---------|
| 1      | 5.372         | BB   | 0.2252      | 1420.12427  | 97.52248     | 49.9521 |
| 2      | 7.014         | BB   | 0.3243      | 1422.84985  | 67.96291     | 50.0479 |

Totals : 2842.97412 165.48539

\*\*\* End of Report \*\*\*

Instrument 1 5/29/2011 3:25:51 PM LTL

Page 1 of 1

ata File D:\LC\LQH\DATE\LQH-3-10(16)\LQH-3-10(16) 2011-05-29 11-11-19\088-0901.D  
Sample Name: LQH-3-16D

```
=====
Acq. Operator   : LTL                               Seq. Line :    9
Acq. Instrument : Instrument 1                       Location  : Vial 88
Injection Date  : 5/29/2011 1:19:07 PM              Inj       :    1
                                                    Inj Volume: 5 µl

Acq. Method     : D:\LC\LQH\DATE\LQH-3-10(16)\LQH-3-10(16) 2011-05-29 11-11-19\ASH-2-98-1ML-
                  220NM-15MIN.M
Last changed    : 5/27/2011 12:01:57 PM by THL
Analysis Method : D:\LC\LQH\DATE\LQH-3-10(16)\LQH-3-10(16) 2011-05-29 11-11-19\088-0901.D\
                  DA.M (ASH-2-98-1ML-220NM-15MIN.M)
Last changed    : 5/29/2011 3:27:28 PM by LTL
                  (modified after loading)
=====
```

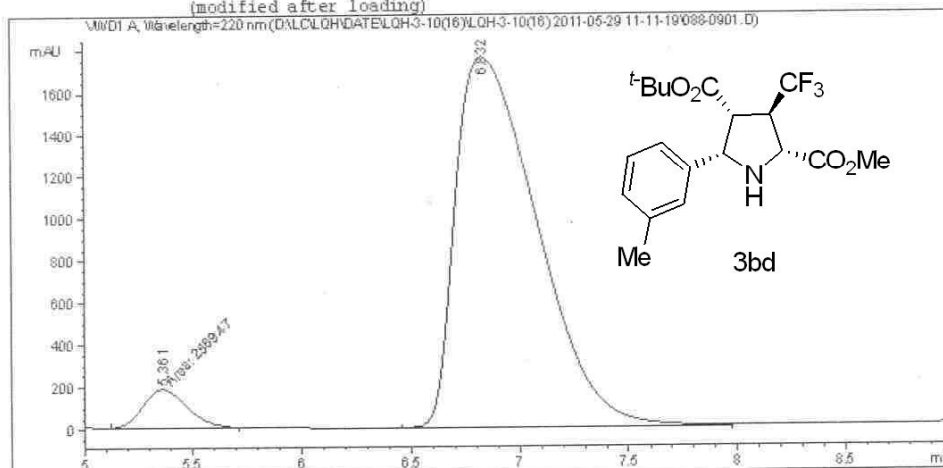

Area Percent Report

```
Sorted By      : Signal
Multiplier     : 1.0000
Dilution       : 1.0000
Use Multiplier & Dilution Factor with ISTDs
```

Signal 1: Wavelength=220 nm

| Peak # | RetTime [min] | Type | Width [min] | Area mAU   | Height [mAU] | Area %  |
|--------|---------------|------|-------------|------------|--------------|---------|
| 1      | 5.361         | NM   | 0.2363      | 2569.47046 | 181.25473    | 5.2680  |
| 2      | 6.832         | VV   | 0.4193      | 4.62060e4  | 1763.39197   | 94.7320 |

Totals : 4.87755e4 1944.64670

\*\*\* End of Report \*\*\*



ata File D:\LC\LQH\DATE\LQH-3-1\LQH-3-7(9) 2010-10-30 17-18-30\057-0301.D  
ample Name: LQH-3-9

=====

|                                        |                    |
|----------------------------------------|--------------------|
| Acq. Operator : DXQ                    | Seq. Line : 3      |
| Acq. Instrument : Instrument 1         | Location : Vial 57 |
| Injection Date : 10/30/2010 5:42:29 PM | Inj : 1            |
|                                        | Inj Volume : 5 µl  |

Acq. Method : D:\LC\LQH\DATE\LQH-3-1\LQH-3-7(9) 2010-10-30 17-18-30\ASH-2-98-IML-220NM-10MIN.M

Last changed : 9/29/2010 2:44:36 PM by DXQ

Analysis Method : D:\LC\LQH\DATE\LQH-3-1\LQH-3-7(9) 2010-10-30 17-18-30\057-0301.D\DA.M (ASH-2-98-IML-220NM-10MIN.M)

Last changed : 10/30/2010 6:03:54 PM by thl  
(modified after loading)

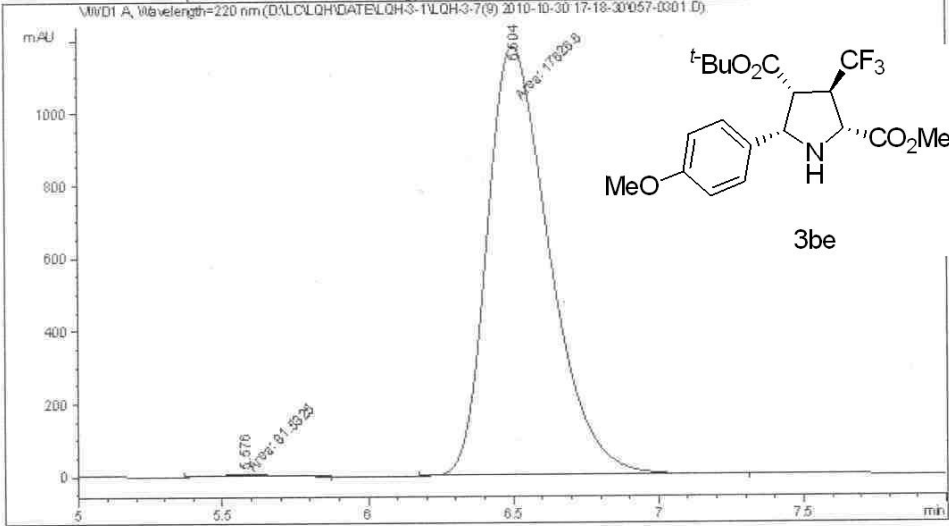

=====  
Area Percent Report  
=====

Sorted By : Signal  
Multiplier : 1.0000  
Dilution : 1.0000  
Use Multiplier & Dilution Factor with ISTDs

Signal 1: VMD1 A, Wavelength=220 nm

| Peak # | RetTime [min] | Type | Width [min] | Area mAU *s | Height [mAU] | Area %  |
|--------|---------------|------|-------------|-------------|--------------|---------|
| 1      | 5.576         | MM   | 0.1902      | 81.53249    | 7.14318      | 0.4604  |
| 2      | 6.504         | MM   | 0.2489      | 1.76266e4   | 1180.07593   | 99.5396 |

Totals : 1.77081e4 1187.21911

Instrument 1 10/30/2010 6:03:59 PM thl

Page 1 of 1



Data File D:\LC\LQH\DATE\LQH-3-1\LQH-3-12-17 2010-11-08 14-58-13\077-0801.D  
Sample Name: LQH-3-17B

```
=====
Acq. Operator   : DXQ                      Seq. Line :    8
Acq. Instrument : Instrument 1              Location  : Vial 77
Injection Date  : 11/8/2010 4:46:08 PM      Inj       :    1
                                           Inj Volume: 5 µl
Acq. Method     : D:\LC\LQH\DATE\LQH-3-1\LQH-3-12-17 2010-11-08 14-58-13\ASH-2-98-1ML-220NM-15MIN.M
Last changed    : 11/8/2010 4:59:47 PM by DXQ
                  (modified after loading)
Analysis Method : D:\LC\LQH\DATE\LQH-3-1\LQH-3-12-17 2010-11-08 14-58-13\077-0801.D\DA.M (
                  ASH-2-98-1ML-220NM-15MIN.M)
Last changed    : 11/8/2010 5:35:28 PM by TMC
                  (modified after loading)
=====
```

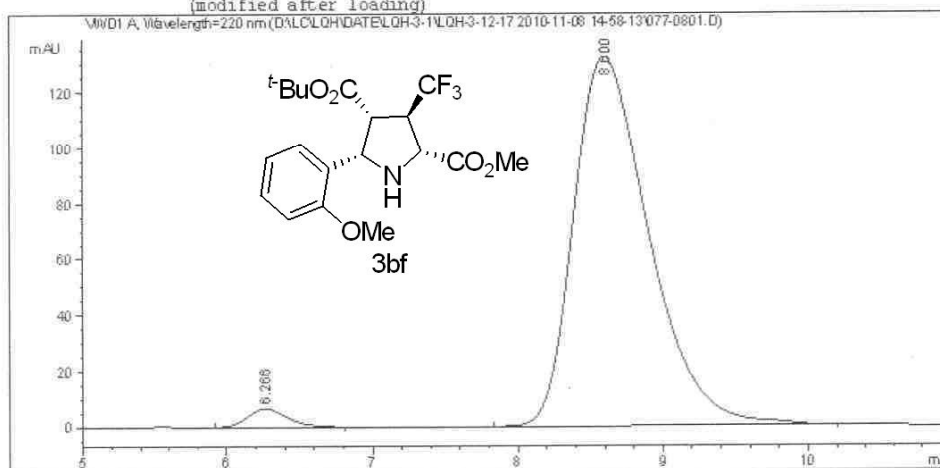

# Area Percent Report

```
Sorted By      : Signal
Multiplier     : 1.0000
Dilution       : 1.0000
Use Multiplier & Dilution Factor with ISTDs
```

Signal 1: VMD1 A, Wavelength=220 nm

| Peak # | RetTime [min] | Type | Width [min] | Area mAU   | Height [mAU] | Area %  |
|--------|---------------|------|-------------|------------|--------------|---------|
| 1      | 6.266         | EB   | 0.2898      | 125.38615  | 6.65074      | 2.5636  |
| 2      | 8.600         | EB   | 0.5548      | 4765.54150 | 132.57668    | 97.4364 |

Totals : 4890.92765 139.22741

\*\*\* End of Report \*\*\*

Instrument 1 11/8/2010 5:35:32 PM TMC

Page 1 of 1

ata File D:\LC\LQH\DATE\LQH-3-1\LQH-3-1-5 2010-10-29 18-45-16\023-0201.D  
ample Name: LQH-3-1

=====

|                 |                         |            |           |
|-----------------|-------------------------|------------|-----------|
| Acq. Operator   | : DXQ                   | Seq. Line  | : 2       |
| Acq. Instrument | : Instrument 1          | Location   | : Vial 23 |
| Injection Date  | : 10/29/2010 6:58:28 PM | Inj        | : 1       |
|                 |                         | Inj Volume | : 5 µl    |

Acq. Method : D:\LC\LQH\DATE\LQH-3-1\LQH-3-1-5 2010-10-29 18-45-16\ASH-2-98-1ML-220NM.M  
Last changed : 10/29/2010 7:13:41 PM by DXQ  
(modified after loading)

Analysis Method : D:\LC\LQH\DATE\LQH-3-1\LQH-3-1-5 2010-10-29 18-45-16\023-0201.D\DA.M (ASH-2-98-1ML-220NM.M)  
Last changed : 11/2/2010 6:35:19 PM by dxq  
(modified after loading)

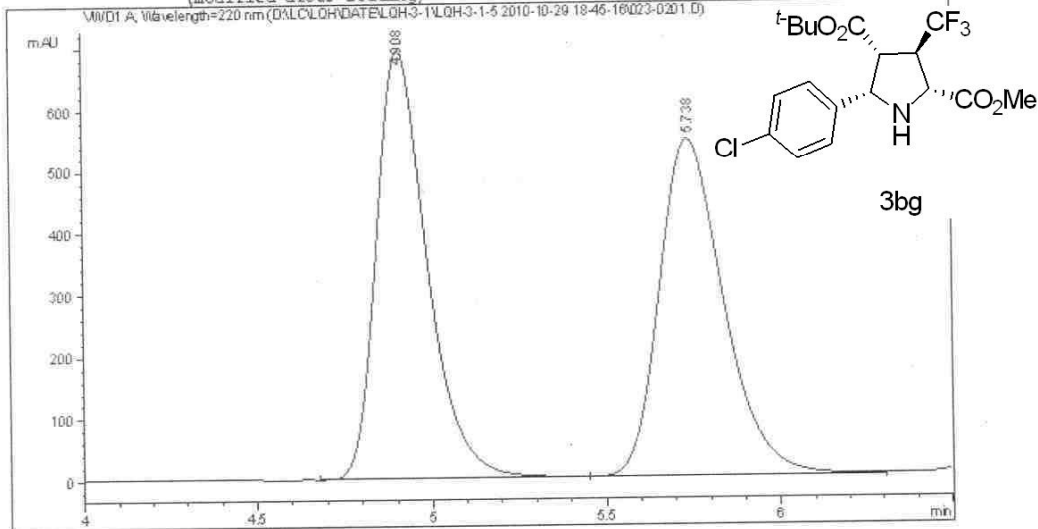

=====  
Area Percent Report  
=====

Sorted By : Signal  
Multiplier : 1.0000  
Dilution : 1.0000  
Use Multiplier & Dilution Factor with ISTDs

Signal 1: WVD1 A, Wavelength=220 nm

| Peak # | RetTime [min] | Type | Width [min] | Area mAU   | Height [mAU] | Area %  |
|--------|---------------|------|-------------|------------|--------------|---------|
| 1      | 4.908         | WV   | 0.1532      | 6944.77637 | 693.40997    | 49.9862 |
| 2      | 5.738         | WV   | 0.1955      | 6948.62305 | 544.48187    | 50.0138 |

Totals : 1.38934e4 1237.89185



Data File D:\LC\LQH\DATE\LQH-3-1\LQH-3-6-8 2010-10-30 14-41-39\054-0201.D  
Sample Name: LQH-3-6

```
=====
Acq. Operator   : DXQ                               Seq. Line :    2
Acq. Instrument : Instrument 1                       Location  : Vial 54
Injection Date  : 10/30/2010 2:54:21 PM             Inj       :    1
                                                    Inj Volume: 5 µl
Acq. Method     : D:\LC\LQH\DATE\LQH-3-1\LQH-3-6-8 2010-10-30 14-41-39\ASH-2-98-1ML-220NM-
                  10MIN.M
Last changed    : 9/29/2010 2:44:36 PM by DXQ
Analysis Method : D:\LC\LQH\DATE\LQH-3-1\LQH-3-6-8 2010-10-30 14-41-39\054-0201.D\DA.M (ASH-
                  2-98-1ML-220NM-10MIN.M)
Last changed    : 11/8/2010 8:53:03 PM by THL
                  (modified after loading)
=====
```

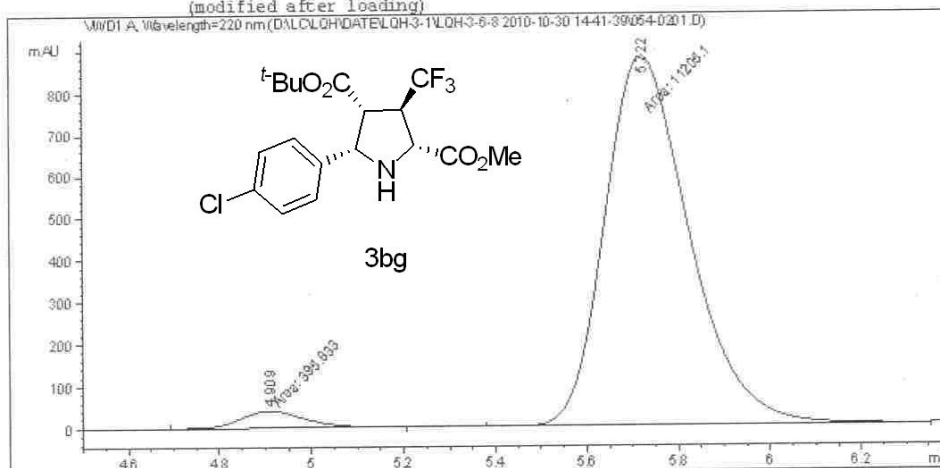

# Area Percent Report

```
Sorted By      : Signal
Multiplier     : 1.0000
Dilution       : 1.0000
Use Multiplier & Dilution Factor with ISTDs
```

Signal 1: VWD1 A, Wavelength=220 nm

| Peak # | RetTime [min] | Type | Width [min] | Area mAU  | Height [mAU] | Area %  |
|--------|---------------|------|-------------|-----------|--------------|---------|
| 1      | 4.909         | MM   | 0.1628      | 395.83264 | 40.51372     | 3.4121  |
| 2      | 5.722         | MM   | 0.2119      | 1.12051e4 | 881.12811    | 96.5879 |

Totals : 1.16010e4 921.64183

\*\*\* End of Report \*\*\*

Instrument 1 11/8/2010 8:53:10 PM THL

Page 1 of 1



Data File D:\LC\LQH\DATE\LQH-3-10(16)\LQH-3-10(16) 2011-05-29 11-11-19\081-0201.D  
Sample Name: LQH-3-10A

```
=====
Acq. Operator   : LTL                               Seq. Line :    2
Acq. Instrument : Instrument 1                       Location  : Vial 81
Injection Date  : 5/29/2011 11:23:38 AM              Inj       :    1
                                                    Inj Volume: 5 µl
Acq. Method     : D:\LC\LQH\DATE\LQH-3-10(16)\LQH-3-10(16) 2011-05-29 11-11-19\ASH-2-98-IML-
                220NM-15MIN.M
Last changed    : 5/27/2011 12:01:57 PM by THL
Analysis Method : D:\LC\LQH\DATE\LQH-3-10(16)\LQH-3-10(16) 2011-05-29 11-11-19\081-0201.D\
                DA.M (ASH-2-98-IML-220NM-15MIN.M)
Last changed    : 5/29/2011 3:13:44 PM by LTL
                (modified after loading)
=====
```

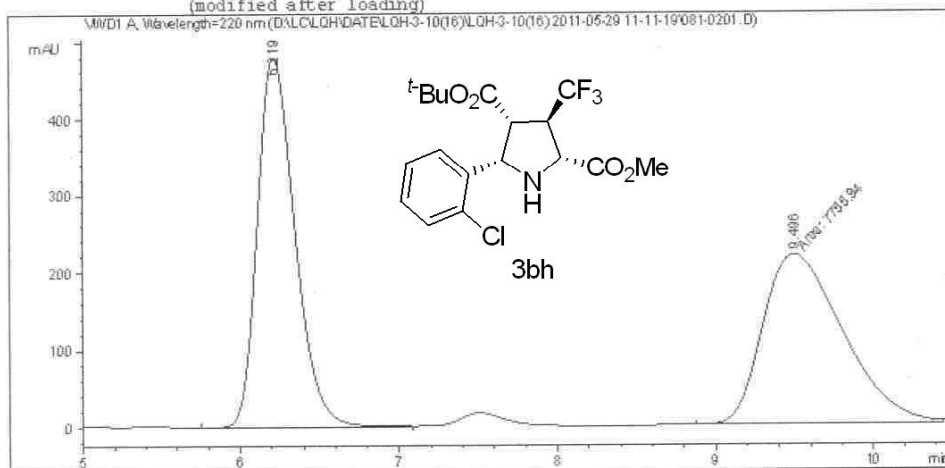

Area Percent Report

```
Sorted By      : Signal
Multiplier     : 1.0000
Dilution       : 1.0000
Use Multiplier & Dilution Factor with ISTDs
```

Signal 1: WWD1 A, Wavelength=220 nm

| Peak # | RetTime [min] | Type | Width [min] | Area mAU*s | Height [mAU] | Area %  |
|--------|---------------|------|-------------|------------|--------------|---------|
| 1      | 6.219         | VB   | 0.2524      | 7812.69580 | 480.23087    | 50.1823 |
| 2      | 9.496         | MM   | 0.5888      | 7755.93555 | 219.52803    | 49.8177 |

Totals : 1.55686e4 699.75890

\*\*\* End of Report \*\*\*

ata File D:\LC\LQH\DATE\LQH-3-10(16)\LQH-3-10(16) 2011-05-29 11-11-19\082-0301.D  
Sample Name: LQH-3-16A

```
=====
Acq. Operator   : LTL                               Seq. Line :    3
Acq. Instrument : Instrument 1                       Location  : Vial 82
Injection Date  : 5/29/2011 11:40:06 AM              Inj       :    1
                                                    Inj Volume: 5 µl
Acq. Method     : D:\LC\LQH\DATE\LQH-3-10(16)\LQH-3-10(16) 2011-05-29 11-11-19\ASH-2-98-1ML-
                220NM-15MIN.M
Last changed    : 5/27/2011 12:01:57 PM by THL
Analysis Method : D:\LC\LQH\DATE\LQH-3-10(16)\LQH-3-10(16) 2011-05-29 11-11-19\082-0301.D\
                DA.M (ASH-2-98-1ML-220NM-15MIN.M)
Last changed    : 5/29/2011 3:16:31 PM by LTL
                (modified after loading)
=====
```

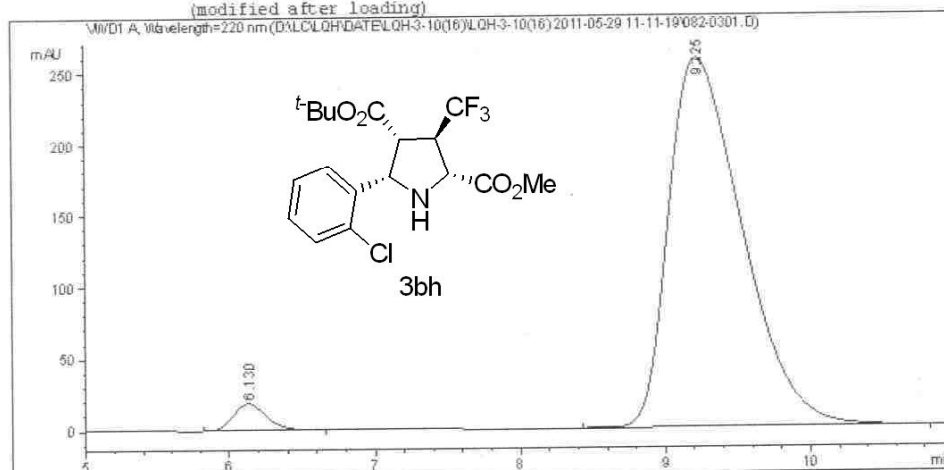

# Area Percent Report

```
Sorted By      : Signal
Multiplier     : 1.0000
Dilution       : 1.0000
Use Multiplier & Dilution Factor with ISTDs
```

Signal 1: VMD1 A, Wavelength=220 nm

| Peak # | RetTime [min] | Type | Width [min] | Area mAU   | Height [mAU] | Area %  |
|--------|---------------|------|-------------|------------|--------------|---------|
| 1      | 6.130         | EB   | 0.2438      | 295.05249  | 18.69994     | 3.1433  |
| 2      | 9.225         | EB   | 0.5489      | 9091.71289 | 258.31909    | 96.8567 |

Totals : 9386.76538 277.01903

\*\*\* End of Report \*\*\*

File D:\LC\LQH\DATE\LQH-3-10(16)\LQH-3-10(16) 2011-05-29 11-11-19\085-0601.D  
Sample Name: LQH-3-10C

```
=====
Acq. Operator   : LTL                               Seq. Line :    6
Acq. Instrument : Instrument 1                       Location  : Vial 85
Injection Date  : 5/29/2011 12:29:31 PM              Inj       :    1
                                                    Inj Volume: 5 µl
Acq. Method     : D:\LC\LQH\DATE\LQH-3-10(16)\LQH-3-10(16) 2011-05-29 11-11-19\ASH-2-98-1ML-
                  220NM-15MIN.M
Last changed    : 5/27/2011 12:01:57 PM by THL
Analysis Method : D:\LC\LQH\DATE\LQH-3-10(16)\LQH-3-10(16) 2011-05-29 11-11-19\085-0601.D\
                  DA.M (ASH-2-98-1ML-220NM-15MIN.M)
Last changed    : 5/29/2011 3:22:20 PM by LTL
                  (modified after loading)
=====
```

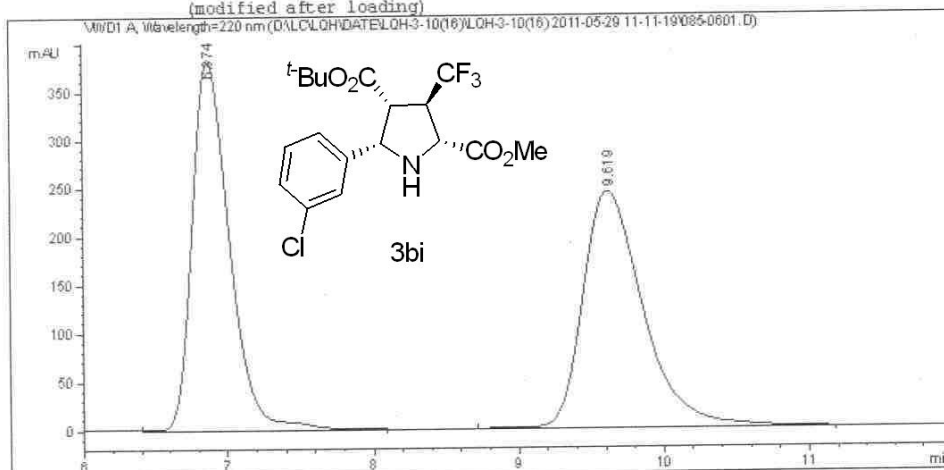

Area Percent Report

```
Sorted By      : Signal
Multiplier     : 1.0000
Dilution       : 1.0000
Use Multiplier & Dilution Factor with ISTDs
```

Signal 1: WV1.D1 A, Wavelength=220 nm

| Peak # | RetTime [min] | Type | Width [min] | Area mAU *s | Height [mAU] | Area %  |
|--------|---------------|------|-------------|-------------|--------------|---------|
| 1      | 6.874         | VB   | 0.2750      | 6820.43066  | 382.43506    | 49.4482 |
| 2      | 9.619         | EB   | 0.4417      | 6972.64600  | 243.60837    | 50.5518 |

Totals : 1.37931e4 626.04343

\*\*\* End of Report \*\*\*

ata File D:\LC\LQH\DATE\LQH-3-10(16)\LQH-3-10(16) 2011-05-29 11-11-19\086-0701.D  
Sample Name: LQH-3-16C

=====

|                 |                                                                                                             |            |           |
|-----------------|-------------------------------------------------------------------------------------------------------------|------------|-----------|
| Acq. Operator   | : LTL                                                                                                       | Seq. Line  | : 7       |
| Acq. Instrument | : Instrument 1                                                                                              | Location   | : Vial 86 |
| Injection Date  | : 5/29/2011 12:46:02 PM                                                                                     | Inj        | : 1       |
|                 |                                                                                                             | Inj Volume | : 5 µl    |
| Acq. Method     | : D:\LC\LQH\DATE\LQH-3-10(16)\LQH-3-10(16) 2011-05-29 11-11-19\ASH-2-98-1ML-220NM-15MIN.M                   |            |           |
| Last changed    | : 5/27/2011 12:01:57 PM by THL                                                                              |            |           |
| Analysis Method | : D:\LC\LQH\DATE\LQH-3-10(16)\LQH-3-10(16) 2011-05-29 11-11-19\086-0701.D\DA.M (ASH-2-98-1ML-220NM-15MIN.M) |            |           |
| Last changed    | : 5/29/2011 3:24:53 PM by LTL<br>(modified after loading)                                                   |            |           |

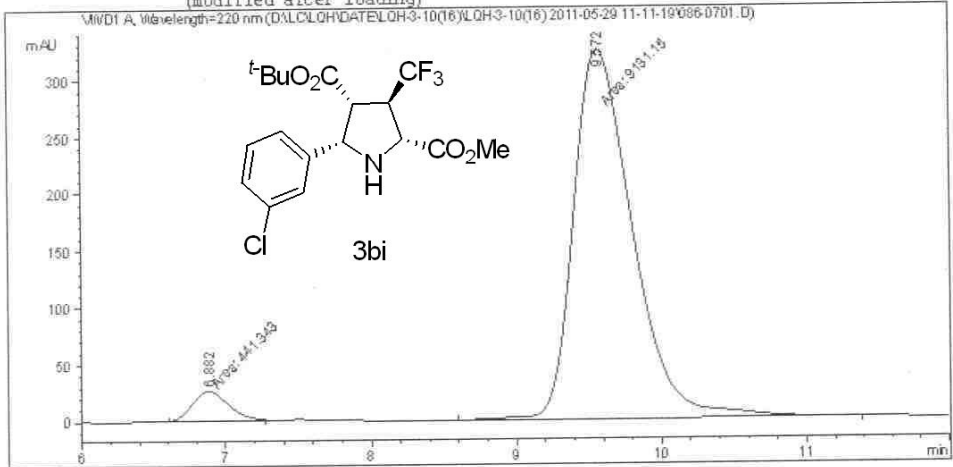

Area Percent Report

Sorted By : Signal  
Multiplier : 1.0000  
Dilution : 1.0000  
Use Multiplier & Dilution Factor with ISTDs

Signal 1: VWD1 A, Wavelength=220 nm

| Peak # | RetTime [min] | Type | Width [min] | Area mAU *s | Height [mAU] | Area %  |
|--------|---------------|------|-------------|-------------|--------------|---------|
| 1      | 6.882         | MM   | 0.2847      | 441.34271   | 25.83364     | 4.6105  |
| 2      | 9.572         | MM   | 0.4690      | 9131.14941  | 324.51608    | 95.3895 |

Totals : 9572.49213 350.34972

\*\*\* End of Report \*\*\*

Data File D:\LC\LQH\DATE\LQH-3-1\LQH-3-1-5 2010-10-29 18-45-16\024-0301.D  
Sample Name: LQH-3-2

```
=====
Acq. Operator   : DXQ                      Seq. Line :    3
Acq. Instrument : Instrument 1              Location  : Vial 24
Injection Date  : 10/29/2010 7:15:17 PM    Inj       :    1
                                           Inj Volume: 5 µl
Acq. Method     : D:\LC\LQH\DATE\LQH-3-1\LQH-3-1-5 2010-10-29 18-45-16\ASH-2-98-1ML-220NM.M
Last changed    : 10/29/2010 7:28:10 PM by DXQ
                  (modified after loading)
Analysis Method : D:\LC\LQH\DATE\LQH-3-1\LQH-3-1-5 2010-10-29 18-45-16\024-0301.D\DA.M (ASH-
                  2-98-1ML-220NM.M)
Last changed    : 11/2/2010 6:38:05 PM by dxq
                  (modified after loading)
=====
```

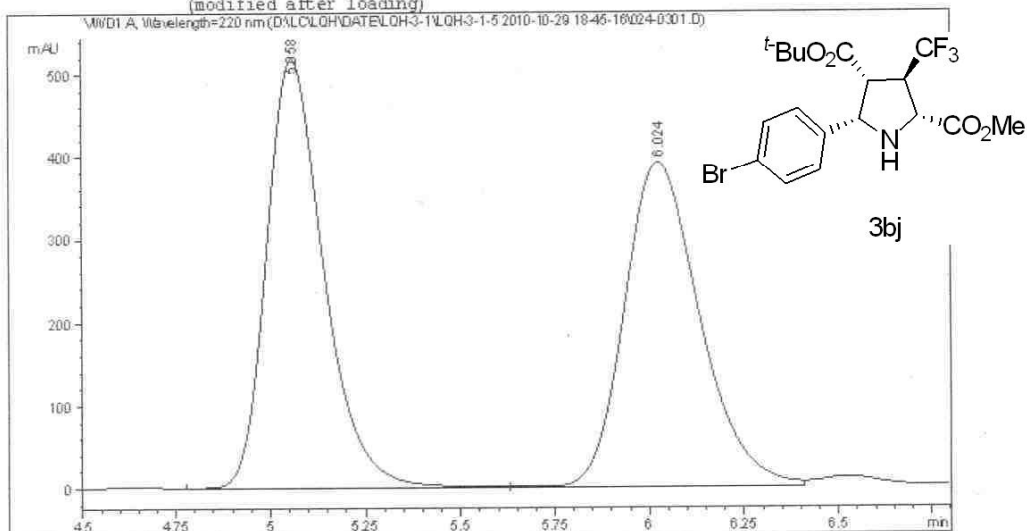

Area Percent Report

```
=====
Sorted By      :      Signal
Multiplier     :      1.0000
Dilution       :      1.0000
Use Multiplier & Dilution Factor with ISTDs
=====
```

Signal 1: WVD1 A, Wavelength=220 nm

| Peak # | RetTime [min] | Type | Width [min] | Area mAU *s | Height [mAU] | Area %  |
|--------|---------------|------|-------------|-------------|--------------|---------|
| 1      | 5.058         | VV   | 0.1584      | 5423.21045  | 518.48712    | 50.0595 |
| 2      | 6.024         | VV   | 0.2123      | 5410.32178  | 391.31061    | 49.9405 |

Totals : 1.08335e4 909.79773

Instrument 1 11/2/2010 6:38:12 PM dxq

Page 1 of 1

ata File D:\LC\LQH\DATE\LQH-3-1\LQH-3-7(9) 2010-10-30 17-18-30\056-0201.D  
sample Name: LQH-3-7

=====

|                 |                                                                                                      |            |           |
|-----------------|------------------------------------------------------------------------------------------------------|------------|-----------|
| Acq. Operator   | : DXQ                                                                                                | Seq. Line  | : 2       |
| Acq. Instrument | : Instrument 1                                                                                       | Location   | : Vial 56 |
| Injection Date  | : 10/30/2010 5:31:13 PM                                                                              | Inj        | : 1       |
|                 |                                                                                                      | Inj Volume | : 5 µl    |
| Acq. Method     | : D:\LC\LQH\DATE\LQH-3-1\LQH-3-7(9) 2010-10-30 17-18-30\ASH-2-98-1ML-220NM-10MIN.M                   |            |           |
| Last changed    | : 9/29/2010 2:44:36 PM by DXQ                                                                        |            |           |
| Analysis Method | : D:\LC\LQH\DATE\LQH-3-1\LQH-3-7(9) 2010-10-30 17-18-30\056-0201.D\DA.M (ASH-2-98-1ML-220NM-10MIN.M) |            |           |
| Last changed    | : 10/30/2010 6:06:05 PM by thl<br>(modified after loading)                                           |            |           |

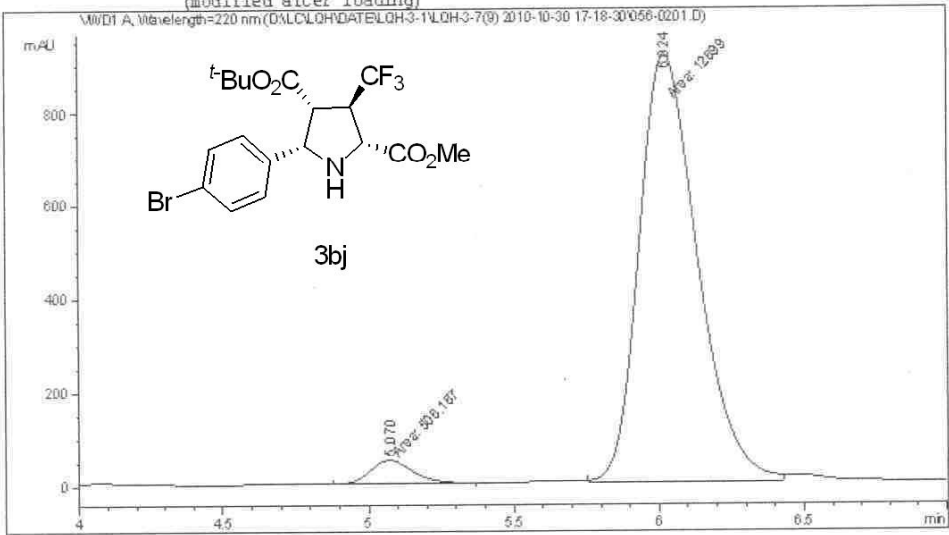

Area Percent Report

Sorted By : Signal  
Multiplier : 1.0000  
Dilution : 1.0000  
Use Multiplier & Dilution Factor with ISTDs

Signal 1: VMD1 A, Wavelength=220 nm

| Peak #   | RetTime [min] | Type | Width [min] | Area mAU  | Height [mAU] | Area %  |
|----------|---------------|------|-------------|-----------|--------------|---------|
| 1        | 5.070         | MM   | 0.1683      | 506.16711 | 50.11565     | 3.8331  |
| 2        | 6.024         | MF   | 0.2312      | 1.26990e4 | 915.46576    | 96.1669 |
| Totals : |               |      |             | 1.32052e4 | 965.58141    |         |

Data File D:\LC\LQH\DATE\LQH-3-1\LQH-3-12-17 2010-11-08 14:58-13\073-0501.D  
Sample Name: LQH-3-13A

```
=====
Acq. Operator   : DXQ                      Seq. Line :    5
Acq. Instrument : Instrument 1              Location  : Vial 73
Injection Date  : 11/8/2010 4:01:37 PM      Inj       :    1
                                           Inj Volume: 5 µl
Acq. Method     : D:\LC\LQH\DATE\LQH-3-1\LQH-3-12-17 2010-11-08 14:58-13\ASH-2-98-1ML-220NM.
M
Last changed    : 11/8/2010 4:13:06 PM by DXQ
                  (modified after loading)
Analysis Method : D:\LC\LQH\DATE\LQH-3-1\LQH-3-12-17 2010-11-08 14:58-13\073-0501.D\DA.M (
                  ASH-2-98-1ML-220NM.M)
Last changed    : 11/8/2010 5:33:08 PM by TMC
                  (modified after loading)
=====
```

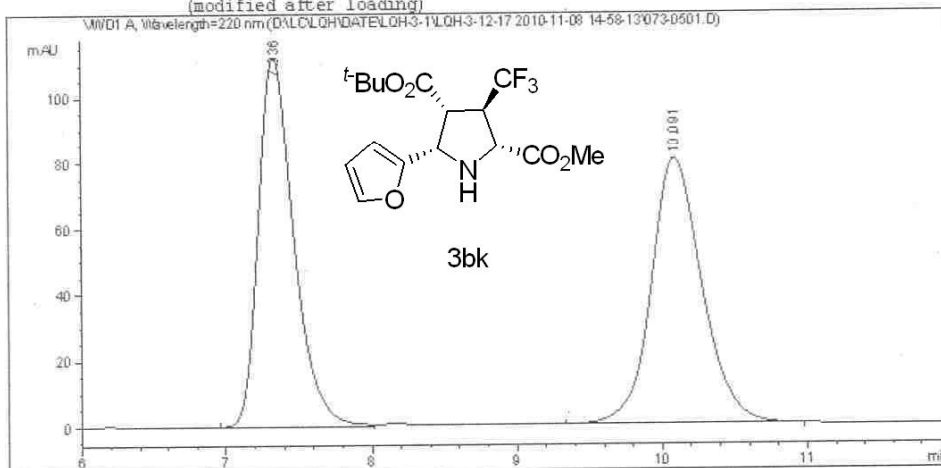

# Area Percent Report

```
Sorted By      : Signal
Multiplier     : 1.0000
Dilution       : 1.0000
Use Multiplier & Dilution Factor with ISTDs
```

Signal 1: WVD1 A, Wavelength=220 nm

| Peak # | RetTime [min] | Type | Width [min] | Area mAU   | Height [mAU] | Area %  |
|--------|---------------|------|-------------|------------|--------------|---------|
| 1      | 7.336         | EE   | 0.2566      | 1881.96692 | 112.34785    | 49.0302 |
| 2      | 10.091        | EE   | 0.3680      | 1956.41455 | 80.50997     | 50.9698 |

Totals : 3838.38147 192.85782

\*\*\* End of Report \*\*\*

Instrument 1 11/8/2010 5:33:12 PM TMC

Page 1 of 1







Data File D:\LC\LQH\DATE\LQH-3-1\LQH-3-12-17 2010-11-08 14-58-13\072-0401.D  
Sample Name: LQH-3-12B

```
=====
Acq. Operator   : DXQ                               Seq. Line :    4
Acq. Instrument : Instrument 1                       Location  : Vial 72
Injection Date  : 11/8/2010 3:46:36 PM              Inj       :    1
                                                    Inj Volume: 5 µl
Acq. Method     : D:\LC\LQH\DATE\LQH-3-1\LQH-3-12-17 2010-11-08 14-58-13\ASH-2-98-1ML-220NM.M
M
Last changed    : 11/8/2010 4:00:06 PM by DXQ
                  (modified after loading)
Analysis Method : D:\LC\LQH\DATE\LQH-3-1\LQH-3-12-17 2010-11-08 14-58-13\072-0401.D\DA.M (
                  ASH-2-98-1ML-220NM.M)
Last changed    : 11/8/2010 5:32:23 PM by TMC
                  (modified after loading)
=====
```

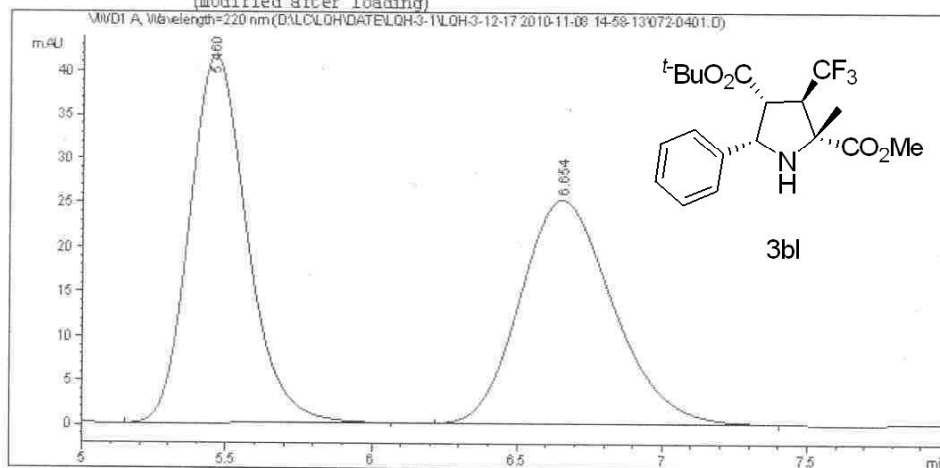

=====  
Area Percent Report  
=====

Sorted By : Signal  
Multiplier : 1.0000  
Dilution : 1.0000  
Use Multiplier & Dilution Factor with ISTDs

Signal I: WVD1 A, Wavelength=220 nm

| Peak # | RetTime [min] | Type | Width [min] | Area mAU  | Height [mAU] | Area %  |
|--------|---------------|------|-------------|-----------|--------------|---------|
| 1      | 5.460         | BB   | 0.2116      | 573.44189 | 41.63863     | 50.4344 |
| 2      | 6.654         | BB   | 0.3454      | 563.56415 | 25.19586     | 49.5656 |

Totals : 1137.00604 66.83449

=====  
\*\*\* End of Report \*\*\*

Instrument 1 11/8/2010 5:32:27 PM TMC

Page 1 of 1

ata File D:\LC\LQH\DATE\LQH-3-1\LQH-3-17C 2010-11-10 08-17-49\083-0201.D  
ample Name: LQH-3-17C

=====

|                 |                         |            |           |
|-----------------|-------------------------|------------|-----------|
| Acq. Operator   | : TMC                   | Seq. Line  | : 2       |
| Acq. Instrument | : Instrument 1          | Location   | : Vial 83 |
| Injection Date  | : 11/10/2010 8:30:11 AM | Inj        | : 1       |
|                 |                         | Inj Volume | : 5 µl    |

Acq. Method : D:\LC\LQH\DATE\LQH-3-1\LQH-3-17C 2010-11-10 08-17-49\ASH-2-98-1ML-22ONM-15MIN.M  
Last changed : 9/29/2010 2:43:57 PM by DXQ  
Analysis Method : D:\LC\LQH\DATE\LQH-3-1\LQH-3-17C 2010-11-10 08-17-49\083-0201.D\DA.M (ASH-2-98-1ML-22ONM-15MIN.M)  
Last changed : 11/10/2010 6:22:09 PM by THL  
(modified after loading)

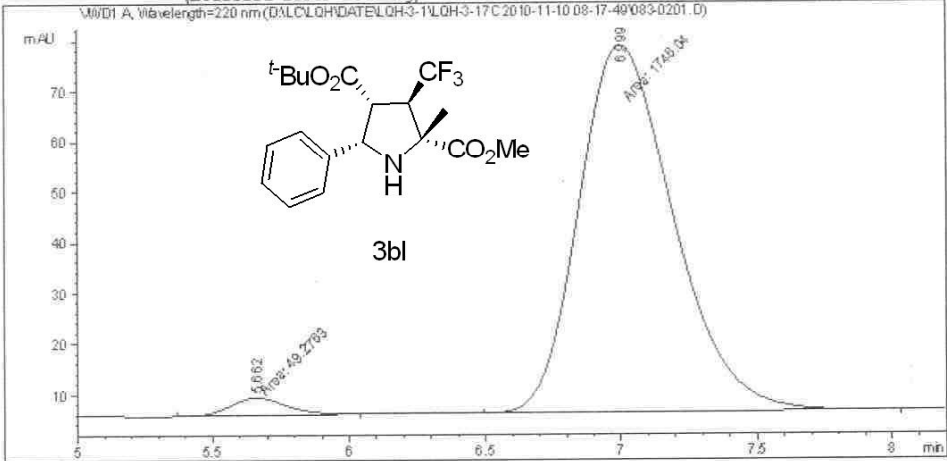

Area Percent Report

Sorted By : Signal  
Multiplier : 1.0000  
Dilution : 1.0000  
Use Multiplier & Dilution Factor with ISTDs

Signal 1: VMD1 A, Wavelength=220 nm

| Peak # | RetTime [min] | Type | Width [min] | Area mAU   | Height [mAU] | Area %  |
|--------|---------------|------|-------------|------------|--------------|---------|
| 1      | 5.652         | MM   | 0.2396      | 49.27632   | 3.42749      | 2.7447  |
| 2      | 6.999         | MM   | 0.4006      | 1746.03809 | 72.64720     | 97.2553 |

Totals : 1795.31441 76.07469

\*\*\* End of Report \*\*\*





Data File D:\LC\LQH\DATE\LQH-3-41\LQH-3-41 2010-12-01 08-47-06\012-0301.D  
Sample Name: LQH-3-41B

=====

|                 |                                                                                                |            |           |
|-----------------|------------------------------------------------------------------------------------------------|------------|-----------|
| Acq. Operator   | : dxq                                                                                          | Seq. Line  | : 3       |
| Acq. Instrument | : Instrument 1                                                                                 | Location   | : Vial 12 |
| Injection Date  | : 12/1/2010 9:32:10 AM                                                                         | Inj        | : 1       |
|                 |                                                                                                | Inj Volume | : 5 µl    |
| Acq. Method     | : D:\LC\LQH\DATE\LQH-3-41\LQH-3-41 2010-12-01 08-47-06\ASH-10-90-1ML-220NM.M                   |            |           |
| Last changed    | : 12/1/2010 10:03:10 AM by dxq<br>(modified after loading)                                     |            |           |
| Analysis Method | : D:\LC\LQH\DATE\LQH-3-41\LQH-3-41 2010-12-01 08-47-06\012-0301.D\DA.M (ASH-10-90-1ML-220NM.M) |            |           |
| Last changed    | : 1/20/2011 5:36:40 PM by THL-7-95-97<br>(modified after loading)                              |            |           |

=====

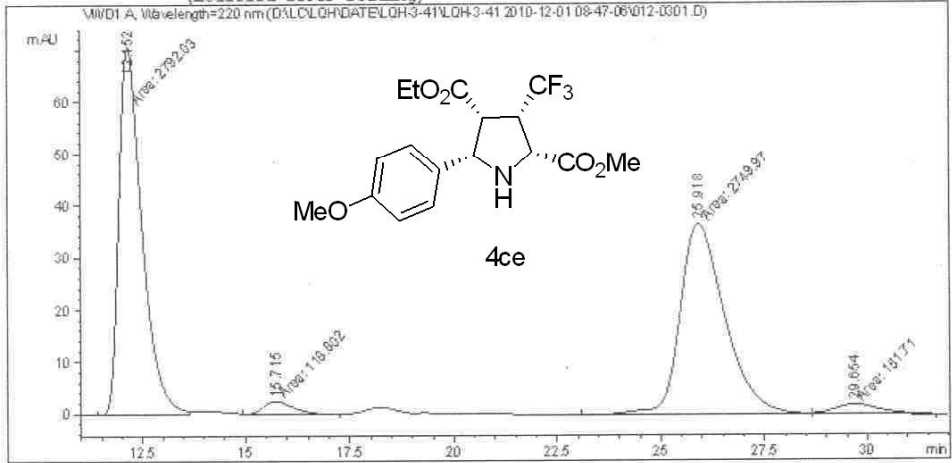

=====  
Area Percent Report  
=====

Sorted By : Signal  
Multiplier : 1.0000  
Dilution : 1.0000  
Use Multiplier & Dilution Factor with ISTDs

Signal 1: VWD1 A, Wavelength=220 nm

| Peak # | RetTime [min] | Type | Width [min] | Area mAU *s | Height [mAU] | Area %  |
|--------|---------------|------|-------------|-------------|--------------|---------|
| 1      | 12.152        | MF   | 0.6584      | 2792.02637  | 70.67298     | 48.0348 |
| 2      | 15.715        | MM   | 0.8053      | 118.80157   | 2.45881      | 2.0439  |
| 3      | 25.918        | MF   | 1.2493      | 2749.96582  | 36.68673     | 47.3112 |
| 4      | 29.654        | FM   | 1.3164      | 151.70990   | 1.92081      | 2.6101  |

Totals : 5812.50365 111.73933

=====  
\*\*\* End of Report \*\*\*





Data File D:\LC\DXQ\DATE\DXQ-9-48\DXQ-9-48AB-ENE 2010-11-30 20-18-33\003-0701.D  
Sample Name: LQH-3-37

=====

|                                         |                   |
|-----------------------------------------|-------------------|
| Acq. Operator : dxq                     | Seq. Line : 7     |
| Acq. Instrument : Instrument 1          | Location : Vial 3 |
| Injection Date : 11/30/2010 11:08:20 PM | Inj : 1           |
|                                         | Inj Volume : 5 µl |

Acq. Method : D:\LC\DXQ\DATE\DXQ-9-48\DXQ-9-48AB-ENE 2010-11-30 20-18-33\ASH-10-90-22ONM-1ML-40MIN.M  
Last changed : 8/31/2010 11:21:45 AM by LTL  
Analysis Method : D:\LC\DXQ\DATE\DXQ-9-48\DXQ-9-48AB-ENE 2010-11-30 20-18-33\003-0701.D\DA.M (ASH-10-90-22ONM-1ML-40MIN.M)  
Last changed : 12/1/2010 11:53:38 AM by dxq  
(modified after loading)

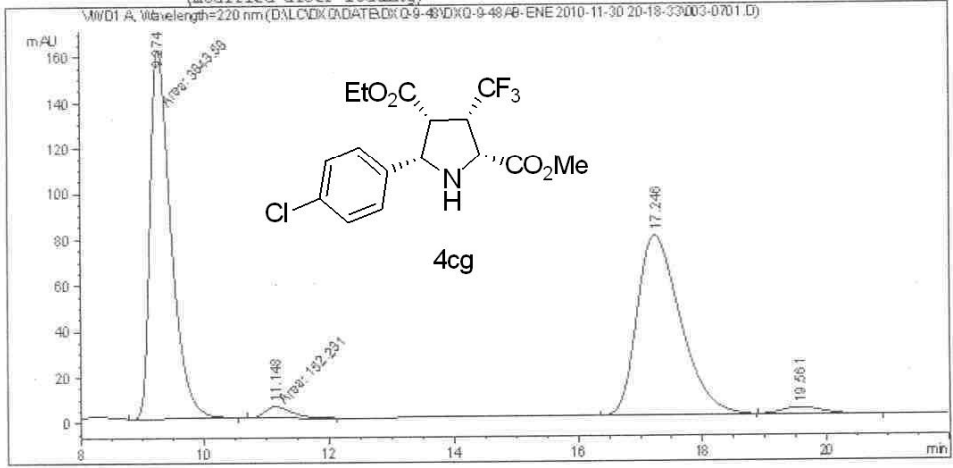

Area Percent Report

Sorted By : Signal  
Multiplier : 1.0000  
Dilution : 1.0000  
Use Multiplier & Dilution Factor with ISTDs

Signal 1: VMD1 A, Wavelength=220 nm

| Peak # | RetTime [min] | Type | Width [min] | Area mAU   | Height [mAU] | Area %  |
|--------|---------------|------|-------------|------------|--------------|---------|
| 1      | 9.274         | MM   | 0.3967      | 3843.58301 | 161.48431    | 48.1590 |
| 2      | 11.148        | MM   | 0.5021      | 152.23082  | 5.05339      | 1.9074  |
| 3      | 17.246        | BB   | 0.7537      | 3827.99316 | 78.51288     | 47.9636 |
| 4      | 19.561        | BB   | 0.7067      | 157.22655  | 3.25235      | 1.9700  |

Totals : 7981.03354 248.30293

\*\*\* End of Report \*\*\*

Data File D:\LC\DXQ\DATE\DXQ-9-48\DXQ-9-48AB-ENE 2010-11-30 20-18-33\004-0801.D  
Sample Name: LQH-3-39

=====

|                                         |                   |
|-----------------------------------------|-------------------|
| Acq. Operator : dxq                     | Seq. Line : 8     |
| Acq. Instrument : Instrument 1          | Location : Vial 4 |
| Injection Date : 11/30/2010 11:49:52 PM | Inj : 1           |
|                                         | Inj Volume : 5 µl |

Acq. Method : D:\LC\DXQ\DATE\DXQ-9-48\DXQ-9-48AB-ENE 2010-11-30 20-18-33\ASH-10-90-220NM-1ML-40MIN.M

Last changed : 8/31/2010 11:21:45 AM by LTL

Analysis Method : D:\LC\DXQ\DATE\DXQ-9-48\DXQ-9-48AB-ENE 2010-11-30 20-18-33\004-0801.D\DA.M (ASH-10-90-220NM-1ML-40MIN.M)

Last changed : 12/1/2010 11:57:02 AM by dxq  
(modified after loading)

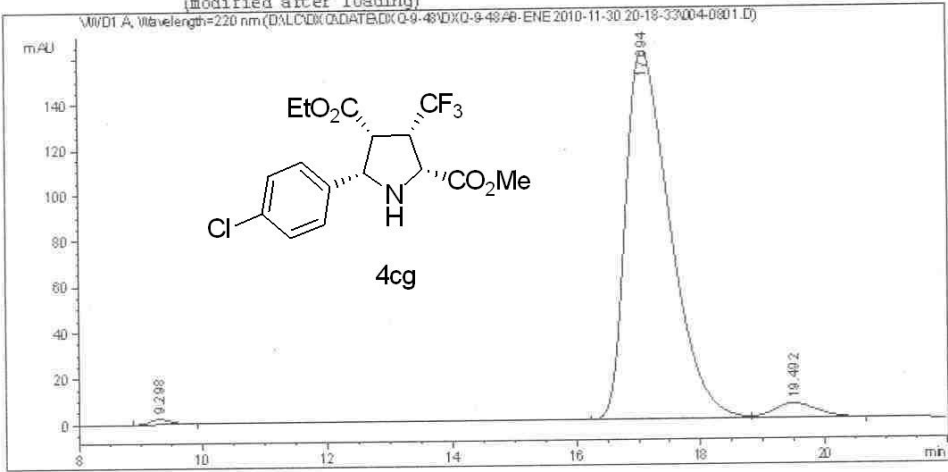

Area Percent Report

Sorted By : Signal  
Multiplier : 1.0000  
Dilution : 1.0000  
Use Multiplier & Dilution Factor with ISTDs

Signal 1: VMD1 A, Wavelength=220 nm

| Peak # | RetTime [min] | Type | Width [min] | Area mAU*s | Height [mAU] | Area %  |
|--------|---------------|------|-------------|------------|--------------|---------|
| 1      | 9.298         | EB   | 0.3579      | 56.63172   | 2.36617      | 0.6772  |
| 2      | 17.094        | EB   | 0.7624      | 7990.20801 | 161.40883    | 95.5413 |
| 3      | 19.492        | EB   | 0.7361      | 316.25586  | 6.45516      | 3.7816  |

Totals : 8363.09559 170.23015

\*\*\* End of Report \*\*\*



Data File D:\LC\LQH\DATE\LQH-3-43\LQH-3-43-1 2010-12-03 15-31-42\015-0201.D  
Sample Name: LQH-3-43-1

=====

|                 |                                                                                                 |            |           |
|-----------------|-------------------------------------------------------------------------------------------------|------------|-----------|
| Acq. Operator   | : dxq                                                                                           | Seq. Line  | : 2       |
| Acq. Instrument | : Instrument 1                                                                                  | Location   | : Vial 15 |
| Injection Date  | : 12/3/2010 3:44:08 PM                                                                          | Inj        | : 1       |
|                 |                                                                                                 | Inj Volume | : 5 µl    |
| Acq. Method     | : D:\LC\LQH\DATE\LQH-3-43\LQH-3-43-1 2010-12-03 15-31-42\ASH-2-98-IML-220NM.M                   |            |           |
|                 | M                                                                                               |            |           |
| Last changed    | : 11/1/2010 2:36:30 PM by DXQ                                                                   |            |           |
| Analysis Method | : D:\LC\LQH\DATE\LQH-3-43\LQH-3-43-1 2010-12-03 15-31-42\015-0201.D\DA.M (ASH-2-98-IML-220NM.M) |            |           |
| Last changed    | : 12/4/2010 8:57:22 PM by THL                                                                   |            |           |
|                 | (modified after loading)                                                                        |            |           |

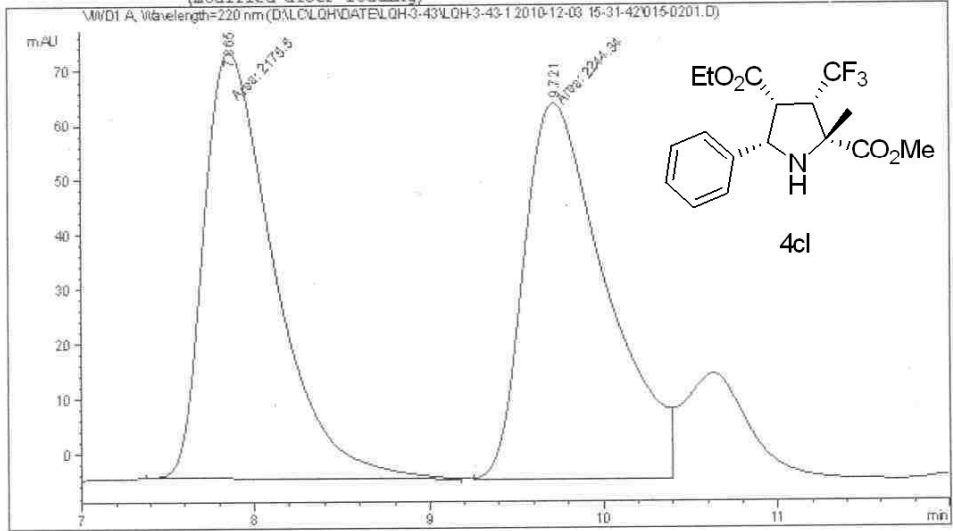

=====  
Area Percent Report  
=====

Sorted By : Signal  
Multiplier : 1.0000  
Dilution : 1.0000  
Use Multiplier & Dilution Factor with ISTDs

Signal 1: VWD1 A, Wavelength=220 nm

| Peak # | RetTime [min] | Type | Width [min] | Area mAU *s | Height [mAU] | Area %  |
|--------|---------------|------|-------------|-------------|--------------|---------|
| 1      | 7.865         | MM   | 0.4659      | 2175.50000  | 77.82289     | 49.2212 |
| 2      | 9.721         | MF   | 0.5453      | 2244.34399  | 68.59515     | 50.7788 |

Totals : 4419.84399 146.41805

Data File D:\LC\LQH\DATE\LQH-3-45-46\LQH-3-45-46 2010-12-04 20-28-43\082-0201.D  
Sample Name: lqh-3-46

=====

|                 |                                                                                                             |            |           |
|-----------------|-------------------------------------------------------------------------------------------------------------|------------|-----------|
| Acq. Operator   | : THL                                                                                                       | Seq. Line  | : 2       |
| Acq. Instrument | : Instrument 1                                                                                              | Location   | : Vial 82 |
| Injection Date  | : 12/4/2010 8:41:06 PM                                                                                      | Inj        | : 1       |
|                 |                                                                                                             | Inj Volume | : 5 µl    |
| Acq. Method     | : D:\LC\LQH\DATE\LQH-3-45-46\LQH-3-45-46 2010-12-04 20-28-43\ASH-2-98-10-220NM-20MIN.M                      |            |           |
| Last changed    | : 12/4/2010 8:55:36 PM by THL<br>(modified after loading)                                                   |            |           |
| Analysis Method | : D:\LC\LQH\DATE\LQH-3-45-46\LQH-3-45-46 2010-12-04 20-28-43\082-0201.D\DA.M<br>(ASH-2-98-10-220NM-20MIN.M) |            |           |
| Last changed    | : 12/4/2010 9:00:09 PM by THL<br>(modified after loading)                                                   |            |           |

=====

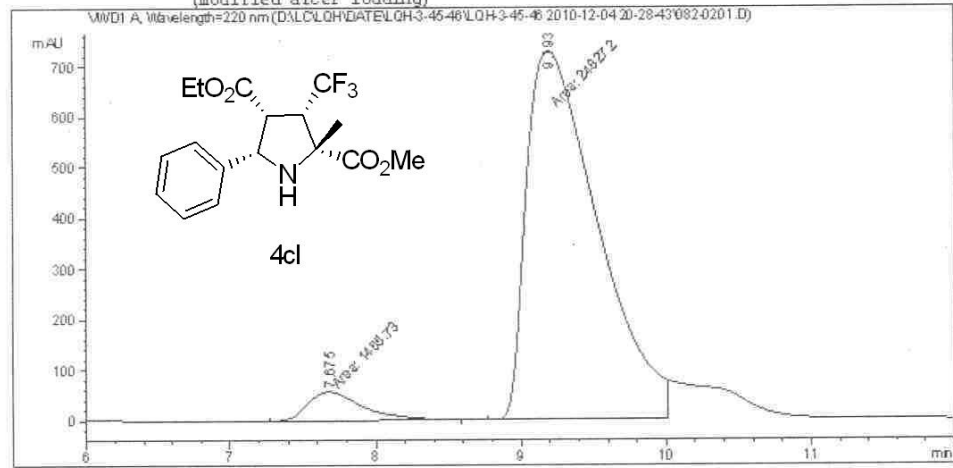

=====

Area Percent Report

=====

Sorted By : Signal  
Multiplier : 1.0000  
Dilution : 1.0000  
Use Multiplier & Dilution Factor with ISTDs

Signal 1: VWD1 A, Wavelength=220 nm

| Peak #   | RetTime [min] | Type | Width [min] | Area mAU   | Height [mAU] | Area %  |
|----------|---------------|------|-------------|------------|--------------|---------|
| 1        | 7.675         | MM   | 0.4328      | 1465.73108 | 56.44477     | 5.5746  |
| 2        | 9.193         | MF   | 0.5679      | 2.48272e4  | 728.68579    | 94.4254 |
| Totals : |               |      |             | 2.62929e4  | 785.13057    |         |

=====

\*\*\* End of Report \*\*\*

Data File D:\LC\LQH\DATE\LQH-4-41\LQH-4-41C2-AD 2011-05-06 19-25-49\012-0101.D  
Sample Name: LQH-4-41C2-AD

=====

|                 |                                                                                                   |            |           |
|-----------------|---------------------------------------------------------------------------------------------------|------------|-----------|
| Acq. Operator   | : TMC                                                                                             | Seq. Line  | : 1       |
| Acq. Instrument | : Instrument 1                                                                                    | Location   | : Vial 12 |
| Injection Date  | : 5/6/2011 7:27:36 PM                                                                             | Inj        | : 1       |
|                 |                                                                                                   | Inj Volume | : 5 µl    |
| Acq. Method     | : D:\LC\LQH\DATE\LQH-4-41\LQH-4-41C2-AD 2011-05-06 19-25-49\ADH-5-95-220NM-1M.M                   |            |           |
| Last changed    | : 1/18/2011 8:38:44 PM by LYY                                                                     |            |           |
| Analysis Method | : D:\LC\LQH\DATE\LQH-4-41\LQH-4-41C2-AD 2011-05-06 19-25-49\012-0101.D\DA.M (ADH-5-95-220NM-1M.M) |            |           |
| Last changed    | : 5/25/2011 6:11:28 PM by FX (modified after loading)                                             |            |           |

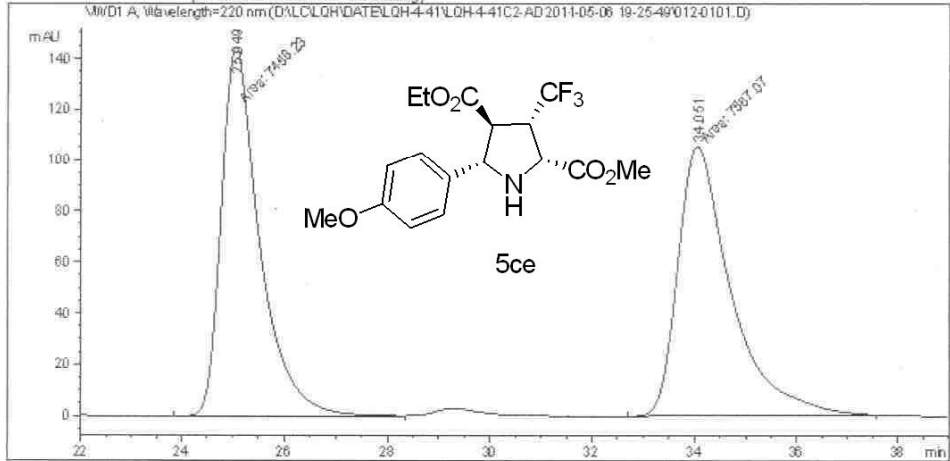

=====

Area Percent Report

=====

Sorted By : Signal

Multiplier : 1.0000

Dilution : 1.0000

Use Multiplier & Dilution Factor with ISTDs

Signal 1: VMD1 A, Wavelength=220 nm

| Peak #   | RetTime [min] | Type | Width [min] | Area mAU   | Height [mAU] | Area %  |
|----------|---------------|------|-------------|------------|--------------|---------|
| 1        | 25.049        | MM   | 0.8601      | 7458.23291 | 144.52231    | 49.6378 |
| 2        | 34.051        | MM   | 1.1973      | 7567.07422 | 105.33887    | 50.3622 |
| Totals : |               |      |             | 1.50253e4  | 249.86118    |         |

=====

\*\*\* End of Report \*\*\*



Data File D:\LC\LQH\DATE\LQH-3-97B\LQH-3-97B 2011-02-24 10-43-21\015-0201.D  
Sample Name: LQH-3-97B

=====

|                 |                                                                               |            |           |
|-----------------|-------------------------------------------------------------------------------|------------|-----------|
| Acq. Operator   | : LTL                                                                         | Seq. Line  | : 2       |
| Acq. Instrument | : Instrument 1                                                                | Location   | : Vial 15 |
| Injection Date  | : 2/24/2011 10:55:48 AM                                                       | Inj        | : 1       |
|                 |                                                                               | Inj Volume | : 5 µl    |
| Acq. Method     | : D:\LC\LQH\DATE\LQH-3-97B\LQH-3-97B 2011-02-24 10-43-21\ASH-5-95-1ML-220NM.M |            |           |
|                 | M                                                                             |            |           |
| Last changed    | : 8/30/2010 3:52:51 PM by tmc                                                 |            |           |
| Analysis Method | : D:\LC\LQH\DATE\LQH-3-97B\LQH-3-97B 2011-02-24 10-43-21\015-0201.D\DA.M (    |            |           |
|                 | ASH-5-95-1ML-220NM.M)                                                         |            |           |
| Last changed    | : 5/25/2011 5:00:10 PM by FX                                                  |            |           |
|                 | (modified after loading)                                                      |            |           |

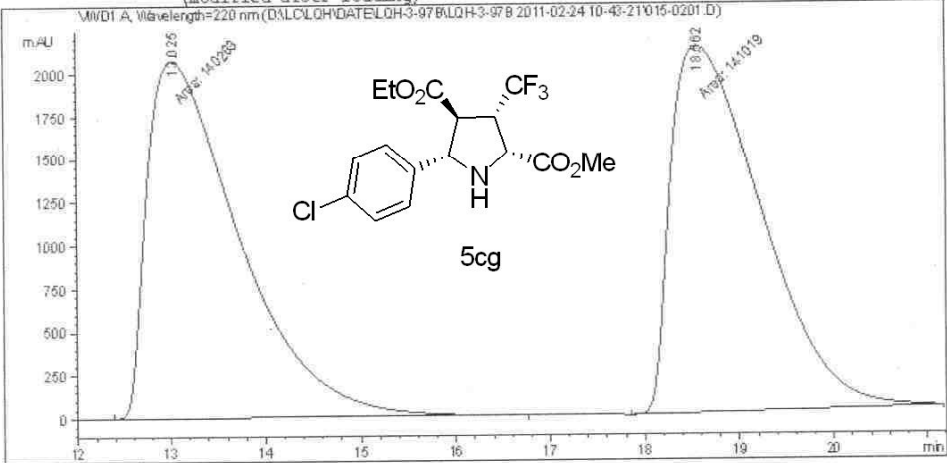

=====  
Area Percent Report  
=====

Sorted By : Signal  
Multiplier : 1.0000  
Dilution : 1.0000  
Use Multiplier & Dilution Factor with ISTDs

Signal 1: VMD1 A, Wavelength=220 nm

| Peak # | RetTime [min] | Type | Width [min] | Area mAU  | Height [mAU] | Area %  |
|--------|---------------|------|-------------|-----------|--------------|---------|
| 1      | 13.025        | MM   | 1.1316      | 1.40283e5 | 2066.08105   | 49.8692 |
| 2      | 18.562        | MM   | 1.1050      | 1.41019e5 | 2127.02661   | 50.1308 |

Totals : 2.81302e5 4193.10767

=====  
\*\*\* End of Report \*\*\*  
=====

Data File D:\LC\LQH\DATE\LQH-3-97B\LQH-3-94 2011-02-24 11-37-11\016-0201.D  
Sample Name: LQH-3-94

=====

|                 |                         |            |           |
|-----------------|-------------------------|------------|-----------|
| Acq. Operator   | : LTL                   | Seq. Line  | : 2       |
| Acq. Instrument | : Instrument 1          | Location   | : Vial 16 |
| Injection Date  | : 2/24/2011 11:49:34 AM | Inj        | : 1       |
|                 |                         | Inj Volume | : 5 µl    |

Acq. Method : D:\LC\LQH\DATE\LQH-3-97B\LQH-3-94 2011-02-24 11-37-11\ASH-5-95-1ML-220MM-30MIN.M

Last changed : 2/24/2011 11:36:08 AM by LTL

Analysis Method : D:\LC\LQH\DATE\LQH-3-97B\LQH-3-94 2011-02-24 11-37-11\016-0201.D\DA.M (ASH-5-95-1ML-220MM-30MIN.M)

Last changed : 5/25/2011 5:02:33 PM by FX  
(modified after loading)

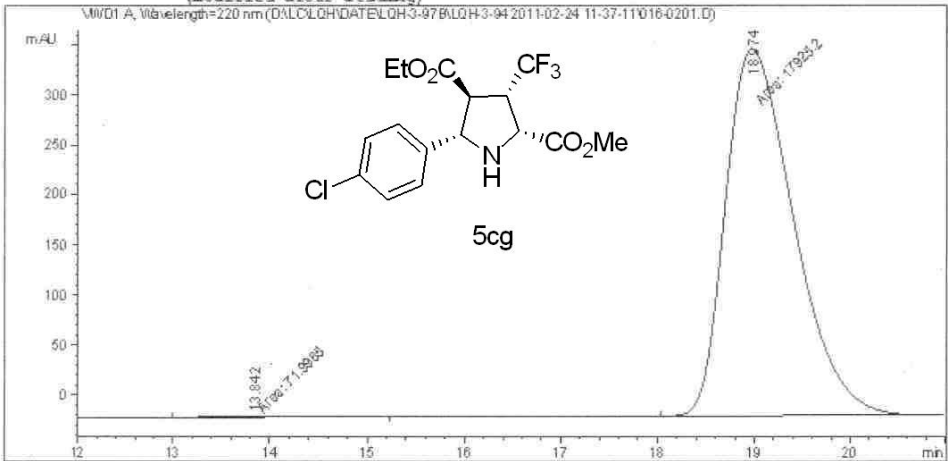

=====  
Area Percent Report  
=====

Sorted By : Signal  
Multiplier : 1.0000  
Dilution : 1.0000  
Use Multiplier & Dilution Factor with ISTDs

Signal 1: VWD1 A, Wavelength=220 nm

| Peak #   | RetTime [min] | Type | Width [min] | Area mAU *s | Height [mAU] | Area %  |
|----------|---------------|------|-------------|-------------|--------------|---------|
| 1        | 13.842        | MM   | 1.0234      | 71.99645    | 1.17246      | 0.4000  |
| 2        | 18.974        | MM   | 0.8132      | 1.79252e4   | 367.36295    | 99.6000 |
| Totals : |               |      |             | 1.79972e4   | 368.53541    |         |

=====  
\*\*\* End of Report \*\*\*









File D:\LC\LQH\DATE\LQH-3-106\LQH-3-106-RAC-3-20-80 2011-03-17 18-51-35\025-0201.D  
Sample Name: LQH-3-106-RAC-3

```
=====
Acq. Operator   : THL                      Seq. Line :    2
Acq. Instrument : Instrument 1              Location  : Vial 25
Injection Date  : 3/17/2011 7:04:08 PM      Inj       :    1
                                           Inj Volume: 5 µl

Acq. Method     : D:\LC\LQH\DATE\LQH-3-106\LQH-3-106-RAC-3-20-80 2011-03-17 18-51-35\ASH-80-
20-1ML-220NM.M
Last changed    : 3/17/2011 7:42:06 PM by THL
(modified after loading)
Analysis Method : D:\LC\LQH\DATE\LQH-3-106\LQH-3-106-RAC-3-20-80 2011-03-17 18-51-35\025-
0201.D\DA.M (ASH-80-20-1ML-220NM.M)
Last changed    : 5/29/2011 4:18:06 PM by LTL
(modified after loading)
=====
```

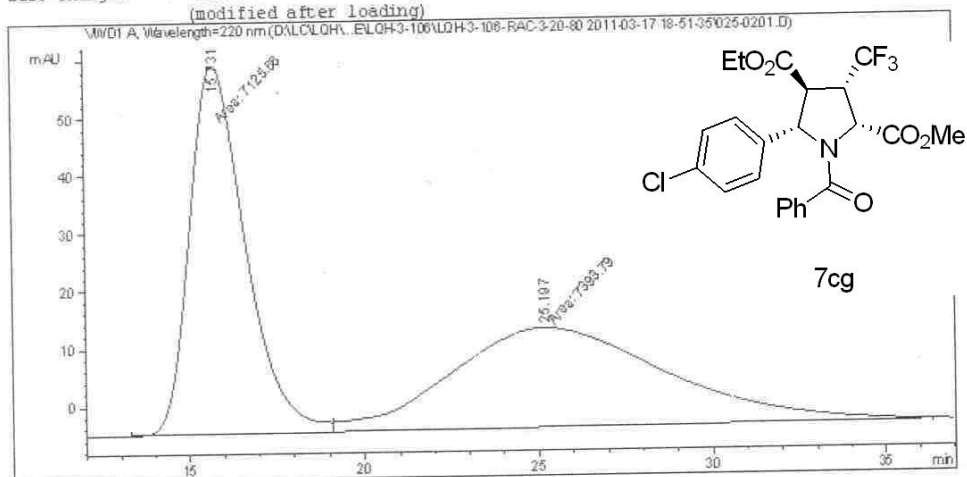

# Area Percent Report

```
Sorted By      : Signal
Multiplier     : 1.0000
Dilution       : 1.0000
Use Multiplier & Dilution Factor with ISTDs
```

Signal 1: VMD1 A, Wavelength=220 nm

| Peak # | RetTime [min] | Type | Width [min] | Area mAU *s | Height [mAU] | Area %  |
|--------|---------------|------|-------------|-------------|--------------|---------|
| 1      | 15.731        | MF   | 1.8589      | 7125.66357  | 63.88663     | 49.0767 |
| 2      | 25.197        | FM   | 7.1756      | 7393.79297  | 17.17337     | 50.9233 |

Totals : 1.45195e4 81.06001

\*\*\* End of Report \*\*\*

Instrument 1 5/29/2011 4:18:12 PM LTL

Page 1 of 1
